# Supplementary material for: Base-promoted ring-opening/recyclization of naphthoquinones to access benzo[5,6][1,4]thiazino[4,3-b]isoquinoline-7,12-diones at room temperature
Source: Royal Society of Chemistry journal article supplement (doi:10.1039/d4qo00782d), 2024-01-01

## Supporting information

### Base-Promoted Ring-pening/Recyclization of Naphthoquinones to Access Benzo[5,6][1,4]thiazino[4,3-*b*]isoquinoline-7,12-diones at Room Temperature

Bin Tan,<sup>‡a</sup> Zhuoqin Li,<sup>‡a</sup> Xinlin Zhou,<sup>a</sup> Chao Zhang,<sup>a</sup> Guo-Jun Deng<sup>\*a,b</sup> and Shanping Chen<sup>\*a</sup>

<sup>a</sup> Key Laboratory for Green Organic Synthesis and Application of Hunan Province, Key Laboratory of Environmentally Friendly Chemistry and Application of Ministry of Education, College of Chemistry, Xiangtan University, Xiangtan 411105, China. E-mail: spchen@xtu.edu.cn; gjdeng@xtu.edu.cn.

<sup>b</sup> School of Chemistry and Chemical Engineering, Henan Normal University Xinxiang, 453007, P. R. China.

#### Table of Contents

|                                                                                                    |     |
|----------------------------------------------------------------------------------------------------|-----|
| 1. General information .....                                                                       | S2  |
| 2. General procedure for synthesis of 2-(indol-3-yl)naphthoquinones .....                          | S2  |
| 3. General procedure for the synthesis of products 3 .....                                         | S2  |
| 4. Procedure for the gram-scale synthesis of <b>3aa</b> .....                                      | S3  |
| 5. Characterization data of products .....                                                         | S4  |
| 6. References .....                                                                                | S17 |
| 7. Crystal data and structure refinement for <b>3ia</b> .....                                      | S17 |
| 8. Copies of <sup>1</sup> H, <sup>13</sup> C and <sup>19</sup> F NMR spectra of all products ..... | S31 |

## 1. General information

Unless otherwise noted, all reagents were obtained from commercial suppliers and used without further purification. Column chromatography was performed using silica gel (200-300 mesh).  $^1\text{H}$  NMR,  $^{13}\text{C}$  NMR and  $^{19}\text{F}$  NMR spectra were recorded on Bruker-AV (400, 100 and 376 MHz, respectively) instrument internally referenced solvent signals. Mass spectra were measured on Agilent 5977 GC-MS instrument (EI). High-resolution mass spectra (HRMS) were performed on FTMS ICR MS BRUKER 7T or Agilent 6230 TOF LC/MS. Melting points were measured on BÜCHI B-545 melting point instrument and were uncorrected. X-ray crystal structure data was using collected on a SuperNova, Dual, Cu at zero, AtlasS2 diffractometer. The structures were solved by direct methods using Olex2 software. The structures of known compounds were further corroborated by comparing their NMR and MS data with those of literature.

## 2. General procedure for synthesis of 2-(indol-3-yl)naphthoquinones

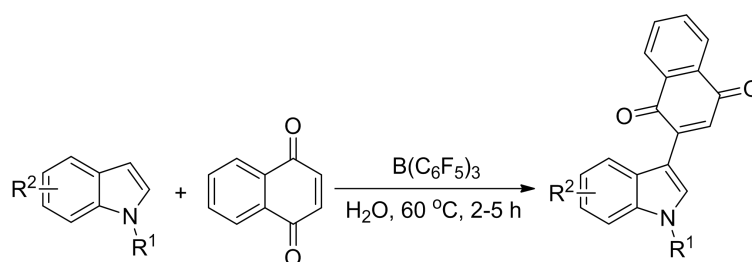

2-(indol-3-yl)naphthoquinones was prepared according to the previous literature.<sup>[1]</sup> indoles (0.4 mmol), naphthalene-1,4-dione (0.4 mmol, 1.0 equiv),  $\text{B}(\text{C}_6\text{F}_5)_3$  (5 mol %) and  $\text{H}_2\text{O}$  (2.0 mL) was added to a 20 mL oven-dried reaction vessel and stirred at 60 °C for 2-5 h. The volatiles were removed under reduced pressure. The residue was purified by column chromatography on silica gel to give 2-(indol-3-yl)naphthoquinones.

## 3. General procedure for the synthesis of products 3

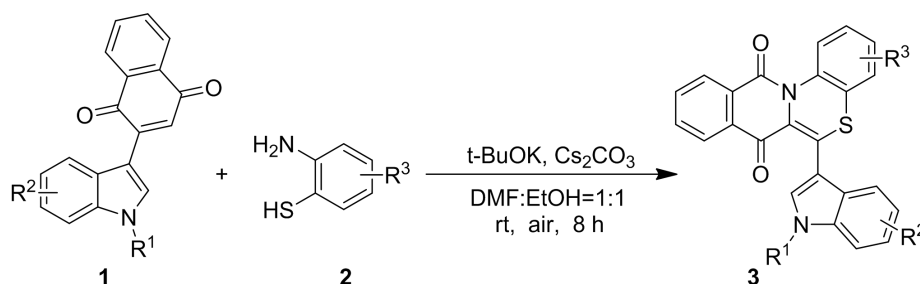

A 10 mL oven-dried reaction vessel was added with 2-(1-methyl-1*H*-indol-3-yl)naphthalene-1,4-

diones (**1**, 0.2 mmol), 2-aminobenzenethiol (**2**, 0.5 mmol, 2.5 equiv), *t*-BuOK (0.18 mmol, 0.9 equiv), Cs<sub>2</sub>CO<sub>3</sub> (0.12 mmol, 0.6 equiv), dry DMF (0.8 mL) and dry EtOH (0.8 mL). The sealed reaction vessel was stirred at room temperature for 8 hours under air atmosphere. The reaction mixture was diluted with ethyl acetate and filtered. The volatiles were removed under reduced pressure and the residue was purified by column chromatography on silica gel to give products **3**.

#### 4. Procedure for the gram-scale synthesis of **3aa**

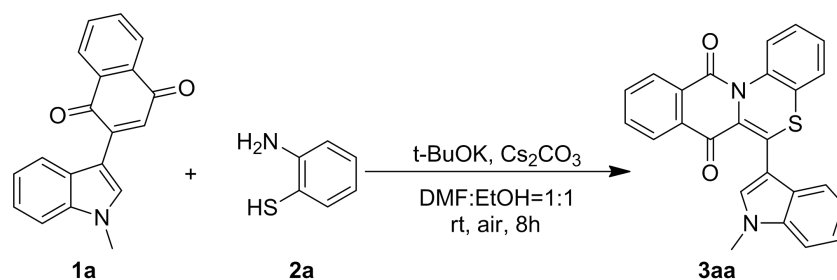

A 25 mL oven-dried reaction vessel was added with 2-(1-methyl-1H-indol-3-yl)naphthalene-1,4-dione (**1a**, 2.870 g, 10.0 mmol), 2-aminobenzenethiol (**2a**, 3.126 g, 25.0 mmol), *t*-BuOK (0.202 g, 1.8 mmol), Cs<sub>2</sub>CO<sub>3</sub> (0.391 g, 1.2 mmol), dry DMF (8.0 mL) and dry EtOH (8.0 mL). The sealed reaction vessel was stirred at room temperature for 8 hour under air atmosphere. The reaction mixture was diluted with ethyl acetate and filtered. The volatiles were removed under reduced pressure and the residue was purified by column chromatography on silica gel (petroleum ether/EtOAc = 5 : 1) to give the product **3aa** (2.244 g, 55% yield).

## 5. Characterization data of products

### 6-(1-Methyl-1*H*-indol-3-yl)benzo[5,6][1,4]thiazino[4,3-*b*]isoquinoline-7,12-dione (**3aa**)

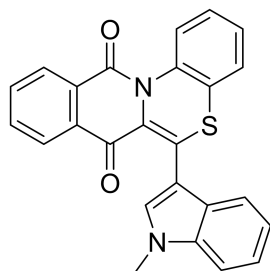

The reaction was conducted with 2-(1-methyl-1*H*-indol-3-yl)naphthalene-1,4-dione (57.4 mg, 0.2 mmol) and 2-aminobenzenethiol (62.5 mg, 0.5 mmol). The residue was purified by column chromatography on silica gel (petroleum ether/EtOAc = 5:1) to yield the desired product **3aa** as red solid (62.1mg, 76% yield). mp: 258-260 °C.

<sup>1</sup>H NMR (400 MHz, CDCl<sub>3</sub>) δ 8.49 (d, *J* = 8.0 Hz, 1H), 8.06 (d, *J* = 7.6 Hz, 1H), 7.87 (t, *J* = 7.0 Hz, 1H), 7.79 (t, *J* = 7.4 Hz, 1H), 7.70 (d, *J* = 8.4 Hz, 1H), 7.61 (s, 1H), 7.38–7.34 (m, 2H), 7.30–7.24 (m, 3H), 7.14 (d, *J* = 8.0 Hz, 1H), 7.08 (t, *J* = 7.6 Hz, 1H), 3.83 (s, 3H). <sup>13</sup>C NMR (100 MHz, CDCl<sub>3</sub>) δ 177.4, 159.9, 137.4, 136.2, 134.5, 134.3, 134.2, 133.3, 132.8, 131.2, 129.3, 129.2, 127.9, 127.3, 127.3, 127.0, 126.1, 125.7, 125.1, 122.8, 120.7, 120.5, 110.3, 109.1, 33.4. HRMS (ESI) *m/z*: [M+H]<sup>+</sup> calcd. for C<sub>25</sub>H<sub>17</sub>N<sub>2</sub>O<sub>2</sub>S 409.1005; found 409.1010.

### 2-Chloro-6-(1-methyl-1*H*-indol-3-yl)benzo[5,6][1,4]thiazino[4,3-*b*]isoquinoline-7,12-dione (**3ab**)

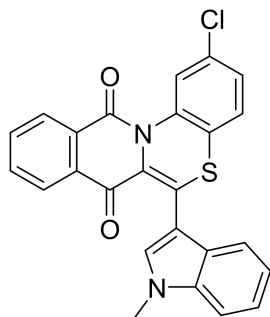

The reaction was conducted with 2-(1-methyl-1*H*-indol-3-yl)naphthalene-1,4-dione (57.4 mg, 0.2 mmol) and 2-amino-4-chlorobenzenethiol (79.5 mg, 0.5 mmol). The residue was purified by column chromatography on silica gel (petroleum ether/EtOAc = 5:1) to yield the desired product **3ab** as red solid (60.1 mg, 69% yield). mp: 272-274 °C.

<sup>1</sup>H NMR (400 MHz, CDCl<sub>3</sub>) δ 8.48 (d, *J* = 8.0 Hz, 1H), 8.05 (d, *J* = 8.0 Hz, 1H), 7.88 (t, *J* = 7.6 Hz,

1H), 7.80 (t,  $J = 7.4$  Hz, 1H), 7.73 (s, 1H), 7.60 (s, 1H), 7.35 (d,  $J = 8.4$  Hz, 1H), 7.28–7.23 (m, 2H), 7.19 (d,  $J = 8.4$  Hz, 1H), 7.12–7.06 (m, 2H), 3.84 (s, 3H).  $^{13}\text{C}$  NMR (100 MHz,  $\text{CDCl}_3$ )  $\delta$  177.2, 159.9, 137.5, 137.3, 134.5, 134.4, 134.3, 133.7, 133.6, 132.9, 130.9, 129.5, 128.9, 127.7, 127.6, 126.2, 125.9, 125.9, 125.1, 122.9, 120.7, 120.7, 110.4, 108.9, 33.4. HRMS (ESI)  $m/z$ :  $[\text{M}+\text{H}]^+$  calcd. for  $\text{C}_{25}\text{H}_{16}\text{ClN}_2\text{O}_2\text{S}$  443.0616; found 443.0596.

**2-Bromo-6-(1-methyl-1*H*-indol-3-yl)benzo[5,6][1,4]thiazino[4,3-*b*]isoquinoline-7,12-dione (3ac)**

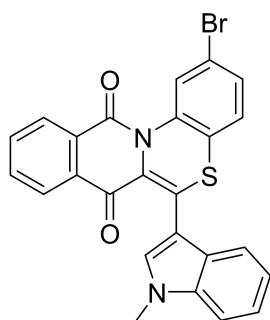

The reaction was conducted with 2-(1-methyl-1*H*-indol-3-yl)naphthalene-1,4-dione (57.4 mg, 0.2 mmol) and 2-amino-4-bromobenzenethiol (102.0 mg, 0.5 mmol). The residue was purified by column chromatography on silica gel (petroleum ether/EtOAc = 5:1) to yield the desired product **3ac** as red solid (58.3 mg, 60% yield). mp: 270-272 °C.

$^1\text{H}$  NMR (400 MHz,  $\text{CDCl}_3$ )  $\delta$  8.46 (d,  $J = 7.6$  Hz, 1H), 8.05 (d,  $J = 7.6$  Hz, 1H), 7.87 (t,  $J = 7.4$  Hz, 1H), 7.80 (t,  $J = 8.0$  Hz, 1H), 7.59–7.56 (m, 2H), 7.46–7.42 (m, 2H), 7.35 (d,  $J = 8.4$  Hz, 1H), 7.28–7.24 (m, 1H), 7.12–7.08 (m, 2H), 3.85 (s, 3H).  $^{13}\text{C}$  NMR (100 MHz,  $\text{CDCl}_3$ )  $\delta$  177.3, 159.9, 137.5, 135.3, 134.4, 134.4, 133.6, 133.5, 132.8, 131.0, 130.9, 129.6, 129.4, 129.4, 129.2, 127.0, 126.2, 125.1, 122.9, 120.7, 120.7, 120.3, 110.4, 108.8, 33.5. HRMS (ESI)  $m/z$ :  $[\text{M}+\text{H}]^+$  calcd. for  $\text{C}_{25}\text{H}_{16}\text{BrN}_2\text{O}_2\text{S}$  487.0110; found 487.0090.

**3-Methyl-6-(1-methyl-1*H*-indol-3-yl)benzo[5,6][1,4]thiazino[4,3-*b*]isoquinoline-7,12-dione (3ad)**

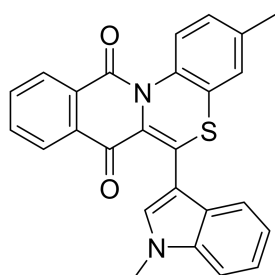

The reaction was conducted with 2-(1-methyl-1*H*-indol-3-yl)naphthalene-1,4-dione (57.4 mg, 0.2 mmol) and 2-amino-5-methylbenzenethiol (69.5 mg, 0.5 mmol). The residue was purified by column chromatography on silica gel (petroleum ether/EtOAc = 5:1) to yield the desired product **3ad** as orange solid (54.9 mg, 65% yield). mp: 263-265 °C.

<sup>1</sup>H NMR (400 MHz, CDCl<sub>3</sub>) δ 8.48 (d, *J* = 7.6 Hz, 1H), 8.05 (d, *J* = 7.6 Hz, 1H), 7.86 (t, *J* = 7.6 Hz, 1H), 7.78 (t, *J* = 7.4 Hz, 1H), 7.59–7.57 (m, 2H), 7.34 (d, *J* = 8.4 Hz, 1H), 7.27–7.24 (m, 1H), 7.16–7.13 (m, 2H), 7.09–7.06 (m, 2H), 3.83 (s, 3H), 2.37 (s, 3H). <sup>13</sup>C NMR (100 MHz, CDCl<sub>3</sub>) δ 177.5, 159.8, 137.4, 137.4, 134.5, 134.2, 133.5, 133.2, 132.6, 131.3, 129.5, 129.3, 128.7, 127.1, 127.0, 126.1, 125.4, 125.2, 122.8, 120.7, 120.5, 110.3, 109.2, 33.4, 21.0. HRMS (ESI) *m/z*: [M+H]<sup>+</sup> calcd. for C<sub>26</sub>H<sub>19</sub>N<sub>2</sub>O<sub>2</sub>S 423.1162; found 423.1164.

**3-Ethoxy-6-(1-methyl-1*H*-indol-3-yl)benzo[5,6][1,4]thiazino[4,3-*b*]isoquinoline-7,12-dione (3ae)**

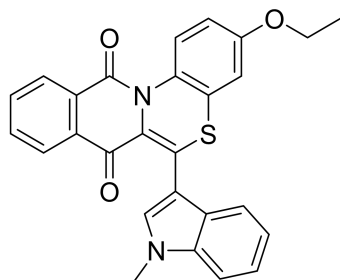

The reaction was conducted with 2-(1-methyl-1*H*-indol-3-yl)naphthalene-1,4-dione (57.4 mg, 0.2 mmol) and 2-amino-5-ethoxybenzenethiol (84.5 mg, 0.5 mmol). The residue was purified by column chromatography on silica gel (petroleum ether/EtOAc = 5:1) to yield the desired product **3ae** as red solid (65.1 mg, 72% yield). mp: 251-253 °C.

<sup>1</sup>H NMR (400 MHz, CDCl<sub>3</sub>) δ 8.46 (d, *J* = 7.6 Hz, 1H), 8.02 (d, *J* = 7.6 Hz, 1H), 7.84 (t, *J* = 7.6 Hz, 1H), 7.75 (t, *J* = 7.6 Hz, 1H), 7.61–7.58 (m, 2H), 7.33 (d, *J* = 8.4 Hz, 1H), 7.25–7.22 (m, 1H), 7.15 (d, *J* = 8.0 Hz, 1H), 7.06 (t, *J* = 7.4 Hz, 1H), 6.89-6.86 (m, 1H), 6.76 (s, 1H), 4.04 (q, *J* = 6.9 Hz, 2H), 3.82 (s, 3H), 1.42 (t, *J* = 6.8 Hz, 3H). <sup>13</sup>C NMR (100 MHz, CDCl<sub>3</sub>) δ 177.6, 159.7, 157.7, 137.4, 134.4, 134.2, 133.6, 133.1, 132.7, 131.3, 129.7, 129.3, 128.5, 128.3, 126.6, 126.1, 125.3, 122.8, 120.7, 120.5, 114.5, 111.9, 110.3, 109.1, 64.1, 33.4, 14.9. HRMS (ESI) *m/z*: [M+Na]<sup>+</sup> calcd. for C<sub>27</sub>H<sub>20</sub>N<sub>2</sub>NaO<sub>3</sub>S 475.1087; found 475.1083.

**3-Fluoro-6-(1-methyl-1*H*-indol-3-yl)benzo[5,6][1,4]thiazino[4,3-*b*]isoquinoline-7,12-dione**

**(3af)**

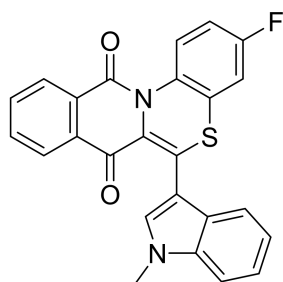

The reaction was conducted with 2-(1-methyl-1*H*-indol-3-yl)naphthalene-1,4-dione (57.4 mg, 0.2 mmol) and 2-amino-5-fluorobenzenethiol (71.5 mg, 0.5 mmol). The residue was purified by column chromatography on silica gel (petroleum ether/EtOAc = 5:1) to yield the desired product **3af** as red solid (62.2 mg, 73% yield). mp: 212-214 °C.

<sup>1</sup>H NMR (400 MHz, CDCl<sub>3</sub>) δ 8.47 (d, *J* = 7.2 Hz, 1H), 8.05 (d, *J* = 7.6 Hz, 1H), 7.87 (t, *J* = 7.4 Hz, 1H), 7.79 (t, *J* = 7.4 Hz, 1H), 7.69–7.66 (m, 1H), 7.61 (s, 1H), 7.35 (d, *J* = 8.4 Hz, 1H), 7.26 (t, *J* = 7.4 Hz, 1H), 7.13 (d, *J* = 7.6 Hz, 1H), 7.09 (d, *J* = 6.8 Hz, 1H), 7.06-7.03 (m, 1H), 7.02-6.99 (m, 1H), 3.84 (s, 3H). <sup>13</sup>C NMR (100 MHz, CDCl<sub>3</sub>) δ 177.5, 160.8 (d, *J* = 248.0 Hz), 159.9, 137.5, 134.4, 134.3, 133.4, 133.3, 132.9, 132.0 (d, *J* = 3.2 Hz), 131.1, 129.4, 127.2 (d, *J* = 8.7 Hz), 126.1, 125.1, 122.9, 120.7 (d, *J* = 3.8 Hz), 115.0 (d, *J* = 22.9 Hz), 113.6 (d, *J* = 24.8 Hz), 110.4, 108.7, 33.4. <sup>19</sup>F NMR (376 MHz, CDCl<sub>3</sub>) δ -114.1. HRMS (ESI) *m/z*: [M+Na]<sup>+</sup> calcd. for C<sub>25</sub>H<sub>15</sub>FN<sub>2</sub>NaO<sub>2</sub>S 449.0730; found 449.0721.

**3-Chloro-6-(1-methyl-1*H*-indol-3-yl)benzo[5,6][1,4]thiazino[4,3-*b*]isoquinoline-7,12-dione**  
**(3ag)**

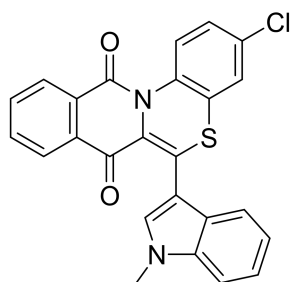

The reaction was conducted with 2-(1-methyl-1*H*-indol-3-yl)naphthalene-1,4-dione (57.4 mg, 0.2 mmol) and 2-amino-5-chlorobenzenethiol (79.5 mg, 0.5 mmol). The residue was purified by column chromatography on silica gel (petroleum ether/EtOAc = 5:1) to yield the desired product **3ag** as red solid (73.4 mg, 83% yield). mp: 278-280 °C.

<sup>1</sup>H NMR (400 MHz, CDCl<sub>3</sub>) δ 8.47 (d, *J* = 7.6 Hz, 1H), 8.05 (d, *J* = 7.6 Hz, 1H), 7.87 (t, *J* = 7.6 Hz,

1H), 7.79 (t,  $J = 7.4$  Hz, 1H), 7.63 (d,  $J = 8.4$  Hz, 1H), 7.59 (s, 1H), 7.36–7.26 (m, 4H), 7.12–7.06 (m, 2H), 3.85 (s, 3H).  $^{13}\text{C}$  NMR (100 MHz,  $\text{CDCl}_3$ )  $\delta$  177.3, 159.9, 137.5, 134.8, 134.4, 134.4, 133.5, 133.5, 132.8, 132.6, 131.0, 129.4, 129.2, 129.2, 128.0, 126.8, 126.6, 126.2, 125.1, 123.0, 120.7, 120.7, 110.4, 108.8, 33.5. HRMS (ESI)  $m/z$ :  $[\text{M}+\text{Na}]^+$  calcd. for  $\text{C}_{25}\text{H}_{15}\text{ClN}_2\text{NaO}_2\text{S}$  465.0435; found 465.0436.

**3-Bromo-6-(1-methyl-1H-indol-3-yl)benzo[5,6][1,4]thiazino[4,3-b]isoquinoline-7,12-dione (3ah)**

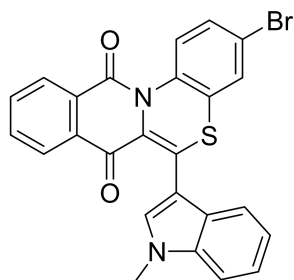

The reaction was conducted with 2-(1-methyl-1H-indol-3-yl)naphthalene-1,4-dione (57.4 mg, 0.2 mmol) and 2-amino-5-bromobenzenethiol (102.0 mg, 0.5 mmol). The residue was purified by column chromatography on silica gel (petroleum ether/EtOAc = 5:1) to yield the desired product **3ah** as red solid (72.9 mg, 75% yield). mp: 274-276 °C.

$^1\text{H}$  NMR (400 MHz,  $\text{CDCl}_3$ )  $\delta$  8.47 (d,  $J = 8.0$  Hz, 1H), 8.05 (d,  $J = 6.8$  Hz, 1H), 7.87 (t,  $J = 7.4$  Hz, 1H), 7.80 (t,  $J = 7.0$  Hz, 1H), 7.59 ((s, 1H),) 7.57 (d,  $J = 8.8$  Hz, 1H), 7.46–7.42 (m, 2H), 7.35 (d,  $J = 8.4$  Hz, 1H), 7.28-7.25 (m, 1H), 7.12–7.06 (m, 2H), 3.84 (s, 3H).  $^{13}\text{C}$  NMR (100 MHz,  $\text{CDCl}_3$ )  $\delta$  177.3, 159.9, 137.5, 135.3, 134.4, 134.4, 133.6, 133.5, 132.8, 131.0, 130.9, 129.6, 129.4, 129.4, 127.0, 126.2, 125.1, 125.1, 122.9, 120.7, 120.7, 120.2, 110.4, 108.8, 33.5. HRMS (ESI)  $m/z$ :  $[\text{M}+\text{Na}]^+$  calcd. for  $\text{C}_{25}\text{H}_{15}\text{BrN}_2\text{NaO}_2\text{S}$  508.9930; found 508.9933.

**6-(1-Ethyl-1H-indol-3-yl)benzo[5,6][1,4]thiazino[4,3-b]isoquinoline-7,12-dione (3ba)**

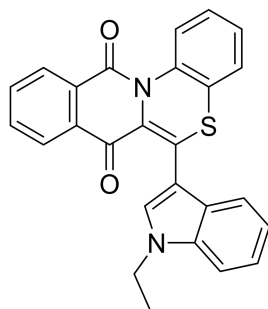

The reaction was conducted with 2-(1-ethyl-1H-indol-3-yl)naphthalene-1,4-dione (60.2 mg, 0.2



mmol) and 2-aminobenzenethiol (62.5 mg, 0.5 mmol). The residue was purified by column chromatography on silica gel (petroleum ether/EtOAc = 5:1) to yield the desired product **3ba** as orange solid (56.5 mg, 67% yield). mp: 275-277 °C.

<sup>1</sup>H NMR (400 MHz, CDCl<sub>3</sub>) δ 8.49 (d, *J* = 8.0 Hz, 1H), 8.07 (d, *J* = 7.6 Hz, 1H), 7.87 (t, *J* = 7.6 Hz, 1H), 7.79 (t, *J* = 7.4 Hz, 1H), 7.72–7.69 (m, 2H), 7.39–7.34 (m, 2H), 7.31–7.23 (m, 3H), 7.15 (d, *J* = 7.6 Hz, 1H), 7.08 (t, *J* = 7.6 Hz, 1H), 4.21 (q, *J* = 7.3 Hz, 2H), 1.54 (t, *J* = 7.2 Hz, 3H). <sup>13</sup>C NMR (100 MHz, CDCl<sub>3</sub>) δ 177.4, 159.9, 136.6, 136.3, 134.5, 134.5, 134.2, 133.3, 131.2, 131.2, 129.3, 129.1, 127.8, 127.4, 127.2, 127.0, 126.1, 125.7, 125.3, 122.7, 120.9, 120.5, 110.4, 109.2, 41.5, 15.3. HRMS (ESI) *m/z*: [M+Na]<sup>+</sup> calcd. for C<sub>26</sub>H<sub>18</sub>N<sub>2</sub>NaO<sub>2</sub>S 445.0981; found 445.0975.

### 6-(1-Octyl-1*H*-indol-3-yl)benzo[5,6][1,4]thiazino[4,3-*b*]isoquinoline-7,12-dione (**3ca**)

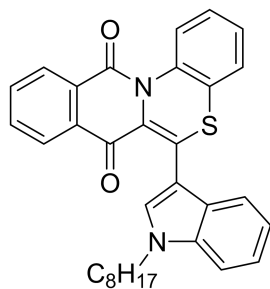

The reaction was conducted with 2-(1-octyl-1*H*-indol-3-yl)naphthalene-1,4-dione (77.0 mg, 0.2 mmol) and 2-aminobenzenethiol (62.5 mg, 0.5 mmol). The residue was purified by column chromatography on silica gel (petroleum ether/EtOAc = 5:1) to yield the desired product **3ca** as orange solid (77.9 mg, 77% yield). mp: 194-196 °C.

<sup>1</sup>H NMR (400 MHz, CDCl<sub>3</sub>) δ 8.49 (d, *J* = 8.0 Hz, 1H), 8.06 (d, *J* = 7.6 Hz, 1H), 7.87 (t, *J* = 7.0 Hz, 1H), 7.79 (t, *J* = 7.4 Hz, 1H), 7.70 (d, *J* = 7.6 Hz, 1H), 7.66 (s, 1H), 7.38–7.33 (m, 2H), 7.31–7.28 (m, 2H), 7.23 (d, *J* = 8.0 Hz, 1H), 7.16 (d, *J* = 8.0 Hz, 1H), 7.07 (t, *J* = 7.6 Hz, 1H), 4.14 (t, *J* = 7.2 Hz, 2H), 1.93-1.86 (m, 2H), 1.41–1.25 (m, 10H), 0.92–0.86 (m, 3H). <sup>13</sup>C NMR (100 MHz, CDCl<sub>3</sub>) δ 177.3, 159.9, 136.8, 136.3, 134.6, 134.5, 134.2, 133.3, 131.9, 131.2, 129.4, 129.2, 127.8, 127.5, 127.3, 127.1, 126.1, 125.8, 125.3, 122.6, 120.9, 120.5, 110.5, 109.0, 47.0, 31.9, 30.1, 29.3, 29.3, 27.1, 22.7, 14.2. HRMS (ESI) *m/z*: [M+H]<sup>+</sup> calcd. for C<sub>32</sub>H<sub>31</sub>N<sub>3</sub>O<sub>2</sub>S 507.2101; found 507.2097.

### 6-(1,2-Dimethyl-1*H*-indol-3-yl)benzo[5,6][1,4]thiazino[4,3-*b*]isoquinoline-7,12-dione (**3ea**)

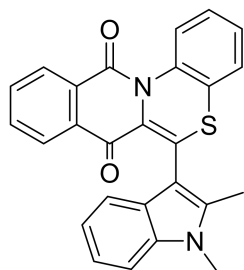

The reaction was conducted with 2-(1,2-dimethyl-1*H*-indol-3-yl)naphthalene-1,4-dione (73.0 mg, 0.2 mmol) and 2-aminobenzenethiol (62.5 mg, 0.5 mmol). The residue was purified by column chromatography on silica gel (petroleum ether/EtOAc = 5:1) to yield the desired product **3ea** as red solid (46.4 mg, 55% yield). mp: 262-264 °C.

<sup>1</sup>H NMR (400 MHz, CDCl<sub>3</sub>) δ 8.48 (d, *J* = 7.6 Hz, 1H), 8.00 (d, *J* = 7.6 Hz, 1H), 7.85 (t, *J* = 7.2 Hz, 1H), 7.75 (d, *J* = 7.2 Hz, 1H), 7.71 (d, *J* = 8.8 Hz, 1H), 7.39–7.35 (m, 2H), 7.32–7.28 (m, 3H), 7.18 (t, *J* = 7.4 Hz, 1H), 7.05 (t, *J* = 7.4 Hz, 1H), 3.70 (s, 3H), 2.38 (s, 3H). <sup>13</sup>C NMR (100 MHz, CDCl<sub>3</sub>) δ 176.7, 159.7, 138.0, 137.0, 135.4, 134.4, 134.2, 133.3, 132.3, 131.1, 129.3, 127.8, 127.7, 127.5, 127.2, 126.3, 126.2, 126.0, 121.7, 120.3, 119.1, 109.4, 106.1, 30.0, 12.3. HRMS (ESI) *m/z*: [M+H]<sup>+</sup> calcd. for C<sub>26</sub>H<sub>19</sub>N<sub>2</sub>O<sub>2</sub>S 423.1162; found 423.1152.

**6-(1-Methyl-2-phenyl-1*H*-indol-3-yl)benzo[5,6][1,4]thiazino[4,3-*b*]isoquinoline-7,12-dione (3fa)**

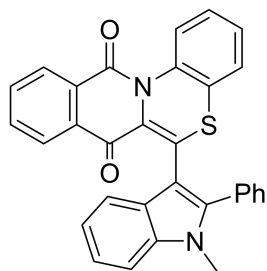

The reaction was conducted with 2-(1-methyl-2-phenyl-1*H*-indol-3-yl)naphthalene-1,4-dione (72.6 mg, 0.2 mmol) and 2-aminobenzenethiol (62.5 mg, 0.5 mmol). The residue was purified by column chromatography on silica gel (petroleum ether/EtOAc = 5:1) to yield the desired product **3fa** as red solid (62.9 mg, 65% yield). mp: 280-282 °C.

<sup>1</sup>H NMR (400 MHz, CDCl<sub>3</sub>) δ 8.28 (d, *J* = 7.6 Hz, 1H), 7.74-7.56 (m, 5H), 7.40 (d, *J* = 8.4 Hz, 1H), 7.34–7.30 (m, 4H), 7.28–7.17 (m, 3H), 7.13 (t, *J* = 7.8 Hz, 2H), 6.96 (t, *J* = 7.4 Hz, 1H), 3.70 (s, 3H). <sup>13</sup>C NMR (100 MHz, CDCl<sub>3</sub>) δ 177.5, 159.5, 140.1, 137.9, 135.5, 134.8, 133.8, 133.6, 132.5, 131.7, 130.8, 130.3, 130.1, 128.7, 128.6, 128.1, 127.8, 127.4, 127.3, 127.1, 126.7, 126.4, 125.7, 122.7, 120.9,

119.9, 110.3, 106.5, 31.5. HRMS (ESI)  $m/z$ :  $[M+H]^+$  calcd. for  $C_{31}H_{21}N_2O_2S$  485.1318; found 485.1316.

**6-(1,4-Dimethyl-1*H*-indol-3-yl)benzo[5,6][1,4]thiazino[4,3-*b*]isoquinoline-7,12-dione (3ga)**

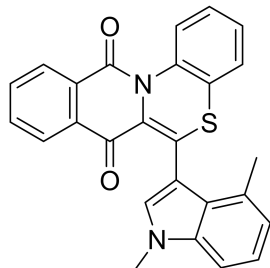

The reaction was conducted with 2-(1,4-dimethyl-1*H*-indol-3-yl)naphthalene-1,4-dione (60.3 mg, 0.2 mmol) and 2-aminobenzenethiol (62.5 mg, 0.5 mmol). The residue was purified by column chromatography on silica gel (petroleum ether/EtOAc = 5:1) to yield the desired product **3ga** as red solid (40.5 mg, 48% yield). mp: 215-217 °C.

$^1H$  NMR (400 MHz,  $CDCl_3$ )  $\delta$  8.46 (d,  $J$  = 7.2 Hz, 1H), 7.99 (d,  $J$  = 7.2 Hz, 1H), 7.83 (t,  $J$  = 7.0 Hz, 1H), 7.73 (d,  $J$  = 7.2 Hz, 2H), 7.69 (d,  $J$  = 8.4 Hz, 1H), 7.35 (t,  $J$  = 7.6 Hz, 1H), 7.28–7.22 (m, 1H), 7.19–7.13 (m, 2H), 7.06 (s, 1H), 6.86 (d,  $J$  = 6.4 Hz, 1H), 3.77 (s, 3H), 2.36 (s, 3H).  $^{13}C$  NMR (100 MHz,  $CDCl_3$ )  $\delta$  176.4, 159.8, 137.3, 135.6, 134.8, 134.3, 133.3, 132.2, 131.1, 131.0, 129.4, 128.7, 127.8, 127.6, 127.5, 126.8, 126.3, 126.0, 122.7, 121.9, 108.8, 107.7, 33.3, 19.4. HRMS (ESI)  $m/z$ :  $[M+H]^+$  calcd. for  $C_{26}H_{19}N_2O_2S$  423.1162; found 423.1155.

**6-(4-Chloro-1-methyl-1*H*-indol-3-yl)benzo[5,6][1,4]thiazino[4,3-*b*]isoquinoline-7,12-dione (3ha)**

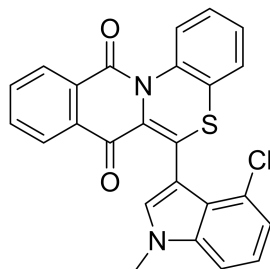

The reaction was conducted with 2-(4-chloro-1-methyl-1*H*-indol-3-yl)naphthalene-1,4-dione (64.4 mg, 0.2 mmol) and 2-aminobenzenethiol (62.5 mg, 0.5 mmol). The residue was purified by column chromatography on silica gel (petroleum ether/EtOAc = 5:1) to yield the desired product **3ha** as red solid (56.6 mg, 64% yield). mp: 254-256 °C.

$^1H$  NMR (400 MHz,  $CDCl_3$ )  $\delta$  8.48 (d,  $J$  = 7.6 Hz, 1H), 8.08 (d,  $J$  = 7.6 Hz, 1H), 7.88 (t,  $J$  = 7.4 Hz,

1H), 7.81 (t,  $J = 7.4$  Hz, 1H), 7.71 (d,  $J = 8.4$  Hz, 1H), 7.57 (s, 1H), 7.38–7.34 (m, 1H), 7.29–7.23 (m, 3H), 7.19 (d,  $J = 8.8$  Hz, 1H), 7.11 (d,  $J = 1.6$  Hz, 1H), 3.80 (s, 3H).  $^{13}\text{C}$  NMR (100 MHz,  $\text{CDCl}_3$ )  $\delta$  177.9, 159.8, 136.1, 135.8, 134.5, 134.4, 133.6, 133.4, 133.2, 131.2, 129.6, 129.4, 128.0, 127.3, 127.1, 127.0, 126.6, 126.1, 126.1, 125.8, 123.1, 120.4, 111.3, 108.7, 33.5. HRMS (ESI)  $m/z$ :  $[\text{M}+\text{Na}]^+$  calcd. for  $\text{C}_{25}\text{H}_{15}\text{ClN}_2\text{NaO}_2\text{S}$  465.0435; found 465.0435.

**6-(5-Fluoro-1-methyl-1*H*-indol-3-yl)benzo[5,6][1,4]thiazino[4,3-*b*]isoquinoline-7,12-dione (3ia)**

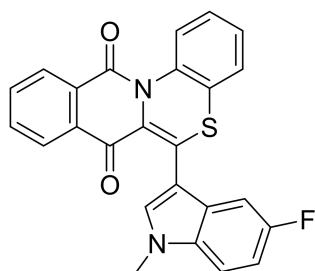

The reaction was conducted with 2-(5-fluoro-1-methyl-1*H*-indol-3-yl)naphthalene-1,4-dione (61.1mg, 0.2 mmol) and 2-aminobenzenethiol (62.5 mg, 0.5 mmol). The residue was purified by column chromatography on silica gel (petroleum ether/EtOAc = 5:1) to yield the desired product **3ia** as red solid (55.4mg, 65% yield). mp: 280-282 °C.

$^1\text{H}$  NMR (400 MHz,  $\text{CDCl}_3$ )  $\delta$  8.49 (d,  $J = 8.0$  Hz, 1H), 8.08 (d,  $J = 7.6$  Hz, 1H), 7.88 (t,  $J = 7.6$  Hz, 1H), 7.80 (t,  $J = 7.6$  Hz, 1H), 7.70 (d,  $J = 8.4$  Hz, 1H), 7.60 (s, 1H), 7.38–7.34 (m, 1H), 7.29–7.24 (m, 3H), 7.02-6.97 (m, 1H), 6.81-6.78 (m, 1H), 3.82 (s, 3H).  $^{13}\text{C}$  NMR (100 MHz,  $\text{CDCl}_3$ )  $\delta$  177.6, 159.9, 158.4 (d,  $J = 245.3$  Hz), 136.2, 134.4, 134.4, 134.0, 134.0, 133.8, 133.5, 131.2, 129.4, 128.0, 127.3, 127.2, 127.1, 126.1, 125.8, 111.4, 111.1 (d,  $J = 2.3$  Hz), 111.0, 109.1 (d,  $J = 4.7$  Hz), 106.1 (d,  $J = 24.7$  Hz), 33.7.  $^{19}\text{F}$  NMR (376 MHz,  $\text{CDCl}_3$ )  $\delta$  -122.9. HRMS (ESI)  $m/z$ :  $[\text{M}+\text{H}]^+$  calcd. for  $\text{C}_{25}\text{H}_{16}\text{FN}_2\text{O}_2\text{S}$  427.0911; found 427.0903.

**6-(5-Chloro-1-methyl-1*H*-indol-3-yl)benzo[5,6][1,4]thiazino[4,3-*b*]isoquinoline-7,12-dione (3ja)**

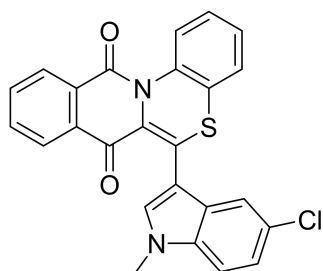

The reaction was conducted with 2-(5-chloro-1-methyl-1*H*-indol-3-yl)naphthalene-1,4-dione (64.4 mg, 0.2 mmol) and 2-aminobenzenethiol (62.5 mg, 0.5 mmol). The residue was purified by column chromatography on silica gel (petroleum ether/EtOAc = 5:1) to yield the desired product **3ja** as red solid (48.6 mg, 55% yield). mp: 238-240 °C.

<sup>1</sup>H NMR (400 MHz, CDCl<sub>3</sub>) δ 8.49 (d, *J* = 7.6 Hz, 1H), 8.08 (d, *J* = 7.6 Hz, 1H), 7.89 (t, *J* = 7.4 Hz, 1H), 7.82 (t, *J* = 8.2 Hz, 1H), 7.71 (d, *J* = 8.0 Hz, 1H), 7.56 (s, 1H), 7.38–7.34 (m, 1H), 7.28–7.23 (m, 3H), 7.21–7.18 (m, 1H), 7.11 (s, 1H), 3.80 (s, 3H). <sup>13</sup>C NMR (100 MHz, CDCl<sub>3</sub>) δ 177.9, 159.8, 136.1, 135.9, 134.5, 134.4, 133.6, 133.5, 133.3, 131.2, 129.6, 129.4, 128.0, 127.4, 127.1, 126.6, 126.2, 126.1, 125.8, 123.2, 120.4, 111.3, 108.7, 33.6. HRMS (ESI) *m/z*: [M+Na]<sup>+</sup> calcd. for C<sub>25</sub>H<sub>15</sub>ClN<sub>2</sub>NaO<sub>2</sub>S 465.0435; found 465.0432.

**6-(5-Bromo-1-methyl-1*H*-indol-3-yl)benzo[5,6][1,4]thiazino[4,3-*b*]isoquinoline-7,12-dione (3ka)**

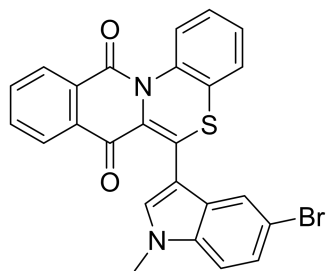

The reaction was conducted with 2-(5-bromo-1-methyl-1*H*-indol-3-yl)naphthalene-1,4-dione (73.2 mg, 0.2 mmol) and 2-aminobenzenethiol (62.5 mg, 0.5 mmol). The residue was purified by column chromatography on silica gel (petroleum ether/EtOAc = 5:1) to yield the desired product **3ka** as red solid (41.8 mg, 43% yield). mp: 250-252 °C.

<sup>1</sup>H NMR (400 MHz, CDCl<sub>3</sub>) δ 8.48 (d, *J* = 8.0 Hz, 1H), 8.08 (d, *J* = 7.6 Hz, 1H), 7.88 (t, *J* = 7.4 Hz, 1H), 7.82 (t, *J* = 7.6 Hz, 1H), 7.71 (d, *J* = 8.0 Hz, 1H), 7.55 (s, 1H), 7.38–7.31 (m, 2H), 7.28–7.25 (m, 3H), 7.20 (d, *J* = 8.8 Hz, 1H), 3.81 (s, 3H). <sup>13</sup>C NMR (100 MHz, CDCl<sub>3</sub>) δ 178.0, 159.8, 136.2, 136.1, 134.5, 134.5, 133.5, 133.0, 131.2, 129.7, 129.4, 128.0, 127.4, 127.1, 126.6, 126.2, 125.9, 125.7, 123.5, 114.2, 111.8, 108.7, 33.6. HRMS (ESI) *m/z*: [M+Na]<sup>+</sup> calcd. for C<sub>25</sub>H<sub>15</sub>BrN<sub>2</sub>NaO<sub>2</sub>S 508.9930; found 508.9920.

**6-(5-Methoxy-1-methyl-1*H*-indol-3-yl)benzo[5,6][1,4]thiazino[4,3-*b*]isoquinoline-7,12-dione (3la)**

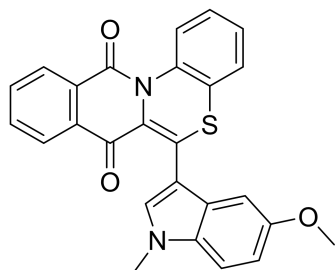

The reaction was conducted with 2-(5-methoxy-1-methyl-1*H*-indol-3-yl)naphthalene-1,4-dione (63.4 mg, 0.2 mmol) and 2-aminobenzenethiol (62.5 mg, 0.5 mmol). The residue was purified by column chromatography on silica gel (petroleum ether/EtOAc = 5:1) to yield the desired product **3la** as red solid (40.3 mg, 46% yield). mp: 208-210 °C.

<sup>1</sup>H NMR (400 MHz, CDCl<sub>3</sub>) δ 8.49 (d, *J* = 7.6 Hz, 1H), 8.10 (d, *J* = 7.6 Hz, 1H), 7.86 (t, *J* = 7.4 Hz, 1H), 7.78 (t, *J* = 7.6 Hz, 1H), 7.69 (d, *J* = 8.0 Hz, 1H), 7.56 (s, 1H), 7.35 (t, *J* = 7.6 Hz, 1H), 7.30–7.25 (m, 2H), 7.22 (d, *J* = 9.2 Hz, 1H), 6.89 (d, *J* = 8.8 Hz, 1H), 6.46 (s, 1H), 3.80 (s, 3H), 3.51 (s, 3H). <sup>13</sup>C NMR (100 MHz, CDCl<sub>3</sub>) δ 177.4, 160.0, 155.0, 136.4, 134.9, 134.4, 134.3, 133.1, 133.0, 132.6, 131.3, 129.5, 128.7, 127.9, 127.3, 127.0, 126.2, 125.7, 125.6, 113.4, 111.2, 108.8, 102.2, 55.5, 33.6. HRMS (ESI) *m/z*: [M+Na]<sup>+</sup> calcd. for C<sub>26</sub>H<sub>18</sub>N<sub>2</sub>NaO<sub>3</sub>S 461.0930; found 461.0932.

### 6-(1,6-Dimethyl-1*H*-indol-3-yl)benzo[5,6][1,4]thiazino[4,3-*b*]isoquinoline-7,12-dione (**3ma**)

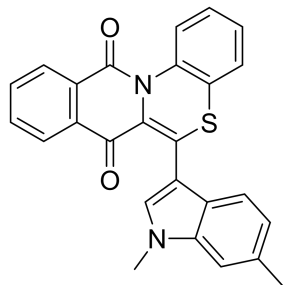

The reaction was conducted with 2-(1,6-dimethyl-1*H*-indol-3-yl)naphthalene-1,4-dione (60.2 mg, 0.2 mmol) and 2-aminobenzenethiol (62.5 mg, 0.5 mmol). The residue was purified by column chromatography on silica gel (petroleum ether/EtOAc = 5:1) to yield the desired product **3ma** as red solid (44.7 mg, 53% yield). mp: 268-270 °C.

<sup>1</sup>H NMR (400 MHz, CDCl<sub>3</sub>) δ 8.48 (d, *J* = 7.6 Hz, 1H), 8.03 (d, *J* = 7.6 Hz, 1H), 7.86 (t, *J* = 7.6 Hz, 1H), 7.77 (t, *J* = 7.6 Hz, 1H), 7.69 (d, *J* = 8.0 Hz, 1H), 7.46 (s, 1H), 7.37–7.33 (m, 1H), 7.28–7.23 (m, 2H), 6.97–6.89 (m, 3H), 4.09 (s, 3H), 2.75 (s, 3H). <sup>13</sup>C NMR (100 MHz, CDCl<sub>3</sub>) δ 177.4, 159.9, 136.2, 136.1, 134.5, 134.2, 134.1, 133.3, 131.2, 129.3, 127.8, 127.5, 127.3, 127.0, 126.3, 126.2, 125.8, 125.6, 122.3, 120.7, 118.8, 108.8, 37.5, 19.8. HRMS (ESI) *m/z*: [M+H]<sup>+</sup> calcd. for C<sub>26</sub>H<sub>19</sub>N<sub>2</sub>O<sub>2</sub>S 423.1162;

found 423.1161.

**6-(6-Methoxy-1-methyl-1*H*-indol-3-yl)benzo[5,6][1,4]thiazino[4,3-*b*]isoquinoline-7,12-dione (3na)**

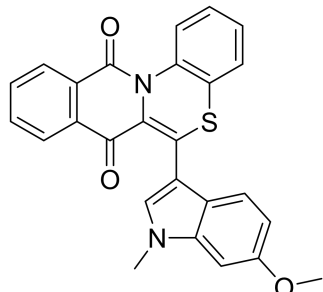

The reaction was conducted with 2-(6-methoxy-1-methyl-1*H*-indol-3-yl)naphthalene-1,4-dione (63.4 mg, 0.2 mmol) and 2-aminobenzenethiol (62.5 mg, 0.5 mmol). The residue was purified by column chromatography on silica gel (petroleum ether/EtOAc = 5:1) to yield the desired product **3na** as orange solid (56.9 mg, 65% yield). mp: 235-237 °C.

<sup>1</sup>H NMR (400 MHz, CDCl<sub>3</sub>) δ 8.48 (d, *J* = 7.6 Hz, 1H), 8.06 (d, *J* = 7.6 Hz, 1H), 7.86 (t, *J* = 7.6 Hz, 1H), 7.79 (t, *J* = 7.4 Hz, 1H), 7.69 (d, *J* = 8.0 Hz, 1H), 7.51 (s, 1H), 7.35 (t, *J* = 7.4 Hz, 1H), 7.29–7.24 (m, 2H), 6.98 (d, *J* = 8.8 Hz, 1H), 6.78 (s, 1H), 6.73 (d, *J* = 8.8 Hz, 1H), 3.86 (s, 3H), 3.78 (s, 3H). <sup>13</sup>C NMR (100 MHz, CDCl<sub>3</sub>) δ 177.4, 160.0, 157.0, 138.4, 136.4, 134.6, 134.5, 134.2, 133.3, 131.9, 131.3, 129.4, 129.0, 127.9, 127.4, 127.2, 127.0, 126.1, 125.8, 121.5, 119.3, 110.3, 109.3, 93.9, 55.9, 33.4. HRMS (ESI) *m/z*: [M+H]<sup>+</sup> calcd. for C<sub>26</sub>H<sub>19</sub>N<sub>2</sub>O<sub>3</sub>S 439.1111; found 439.1117

**6-(1,7-Dimethyl-1*H*-indol-3-yl)benzo[5,6][1,4]thiazino[4,3-*b*]isoquinoline-7,12-dione (3pa)**

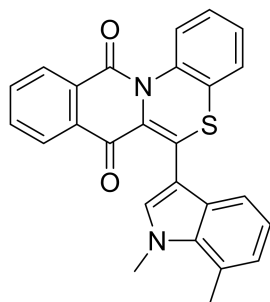

The reaction was conducted with 2-(1,7-dimethyl-1*H*-indol-3-yl)naphthalene-1,4-dione (60.2mg, 0.2 mmol) and 2-aminobenzenethiol (62.5 mg, 0.5 mmol). The residue was purified by column chromatography on silica gel (petroleum ether/EtOAc = 5:1) to yield the desired product **3pa** as red solid (54.9 mg, 65% yield). mp: 244-246 °C.

$^1\text{H}$  NMR (400 MHz,  $\text{CDCl}_3$ )  $\delta$  8.48 (d,  $J = 7.2$  Hz, 1H), 8.04 (d,  $J = 7.6$  Hz, 1H), 7.86 (t,  $J = 8.0$  Hz, 1H), 7.78 (t,  $J = 8.0$  Hz, 1H), 7.69 (d,  $J = 8.0$  Hz, 1H), 7.46 (s, 1H), 7.35 (t,  $J = 7.4$  Hz, 1H), 7.28–7.23 (m, 2H), 6.96–6.89 (m, 3H), 4.09 (s, 3H), 2.76 (s, 3H).  $^{13}\text{C}$  NMR (100 MHz,  $\text{CDCl}_3$ )  $\delta$  177.4, 159.9, 136.2, 136.1, 134.5, 134.2, 134.1, 133.3, 131.2, 129.4, 127.9, 127.5, 127.3, 127.0, 126.3, 126.2, 125.8, 125.6, 122.3, 120.7, 118.8, 108.8, 37.5, 19.8. HRMS (ESI)  $m/z$ :  $[\text{M}+\text{H}]^+$  calcd. for  $\text{C}_{26}\text{H}_{19}\text{N}_2\text{O}_2\text{S}$  423.1162; found 423.1165.

**6-(7-Fluoro-1-methyl-1*H*-indol-3-yl)benzo[5,6][1,4]thiazino[4,3-*b*]isoquinoline-7,12-dione (3qa)**

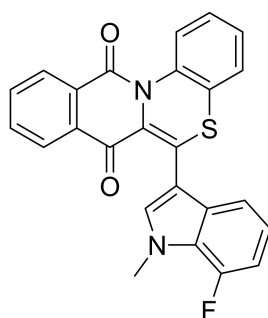

The reaction was conducted with 2-(7-fluoro-1-methyl-1*H*-indol-3-yl)naphthalene-1,4-dione (61.0 mg, 0.2 mmol) and 2-aminobenzenethiol (62.5 mg, 0.5 mmol). The residue was purified by column chromatography on silica gel (petroleum ether/EtOAc = 5:1) to yield the desired product **3qa** as red solid (59.6 mg, 70% yield). mp: 274–276 °C.

$^1\text{H}$  NMR (400 MHz,  $\text{CDCl}_3$ )  $\delta$  8.48 (d,  $J = 7.6$  Hz, 1H), 8.03 (d,  $J = 7.6$  Hz, 1H), 7.87 (t,  $J = 7.6$  Hz, 1H), 7.78 (t,  $J = 7.4$  Hz, 1H), 7.69 (d,  $J = 8.0$  Hz, 1H), 7.49 (s, 1H), 7.38–7.34 (m, 1H), 7.29–7.27 (m, 2H), 6.94–6.86 (m, 3H), 4.03 (s, 3H).  $^{13}\text{C}$  NMR (100 MHz,  $\text{CDCl}_3$ )  $\delta$  177.4, 159.9, 150.7 (d,  $J = 243.4$  Hz), 136.0, 134.4, 134.3, 133.8, 133.4, 133.4, 131.2, 129.9, 129.4, 129.2 (d,  $J = 4.8$  Hz), 128.0, 127.4, 127.2, 127.1, 126.2, 125.8, 125.4 (d,  $J = 10.3$  Hz), 120.9 (d,  $J = 6.6$  Hz), 116.4 (d,  $J = 3.6$  Hz), 109.8, 108.4 (d,  $J = 17.5$  Hz), 36.4.  $^{19}\text{F}$  NMR (376 MHz,  $\text{CDCl}_3$ )  $\delta$  -122.9. HRMS (ESI)  $m/z$ :  $[\text{M}+\text{H}]^+$  calcd. for  $\text{C}_{25}\text{H}_{16}\text{FN}_2\text{O}_2\text{S}$  427.0911; found 427.0901.

**6-(7-Chloro-1-methyl-1*H*-indol-3-yl)benzo[5,6][1,4]thiazino[4,3-*b*]isoquinoline-7,12-dione (3ra)**



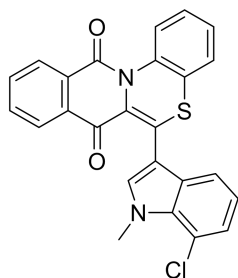

The reaction was conducted with 2-(7-chloro-1-methyl-1*H*-indol-3-yl)naphthalene-1,4-dione (31.5 mg, 0.2 mmol) and 2-aminobenzenethiol (62.5 mg, 0.5 mmol). The residue was purified by column chromatography on silica gel (petroleum ether/EtOAc = 5:1) to yield the desired product **3ra** as red solid (48.6 mg, 55% yield). mp: 285-288°C.

<sup>1</sup>H NMR (400 MHz, CDCl<sub>3</sub>) δ 8.47 (d, *J* = 8.0 Hz, 1H), 8.01 (d, *J* = 8.0 Hz, 1H), 7.86 (t, *J* = 7.6 Hz, 1H), 7.77 (t, *J* = 7.6 Hz, 1H), 7.67 (d, *J* = 8.4 Hz, 1H), 7.46 (s, 1H), 7.37–7.33 (m, 1H), 7.28-7.25 (m, 2H), 7.15 (d, *J* = 8.0 Hz, 1H), 7.02 (d, *J* = 8.0 Hz, 1H), 6.91 (t, *J* = 7.8 Hz, 1H), 4.18 (s, 3H). <sup>13</sup>C NMR (100 MHz, CDCl<sub>3</sub>) δ 177.4, 159.9, 135.9, 134.7, 134.4, 134.3, 133.4, 133.1, 132.7, 131.2, 130.1, 129.4, 128.3, 128.0, 127.4, 127.2, 127.1, 126.2, 125.8, 124.4, 121.2, 119.3, 118.0, 109.2, 37.6. HRMS (ESI) *m/z*: [M+H]<sup>+</sup> calcd. for C<sub>25</sub>H<sub>16</sub>ClN<sub>2</sub>O<sub>2</sub>S 443.0616; found 443.0605.

## 6. References

[1] Dong, Y.; Zhang, H.; Yang, J.; He, S.; Shi, Z.-C.; Zhang, X.-M.; Wang, J.-Y. B(C<sub>6</sub>F<sub>5</sub>)<sub>3</sub>-Catalyzed C–C Coupling of 1,4-Naphthoquinones with the C-3 Position of Indole Derivatives in Water. *ACS Omega* **2019**, *4*, 21567–2157.

## 7. Crystal data and structure refinement for **3ia**

The product **3ia** (20.0 mg) were complete dissolved in DCM (0.5 mL) in a test tube. Then *n*-hexane (2.0 mL) were added dropwise, slow volatilized at room temperature. A few days later, the crystal was grown at room temperature.

A suitable crystal was collected, on a SuperNova, Dual, Cu at zero, AtlasS2 diffractometer. The data were collected and processed using CrysAlisPro. The structures were solved by direct methods using Olex2 software. The crystal was kept at 150.0(10) K during data collection.

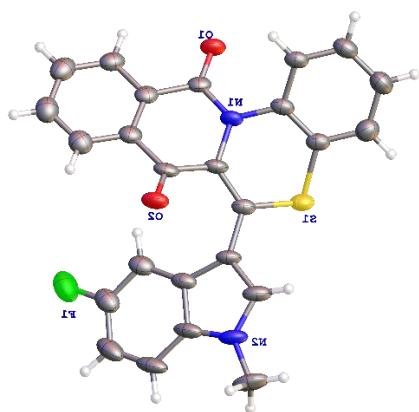

CCDC number: 2194045

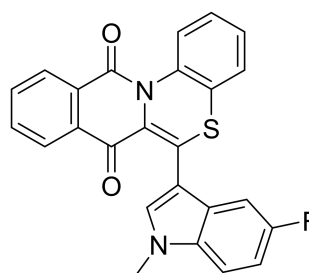

**3ia**

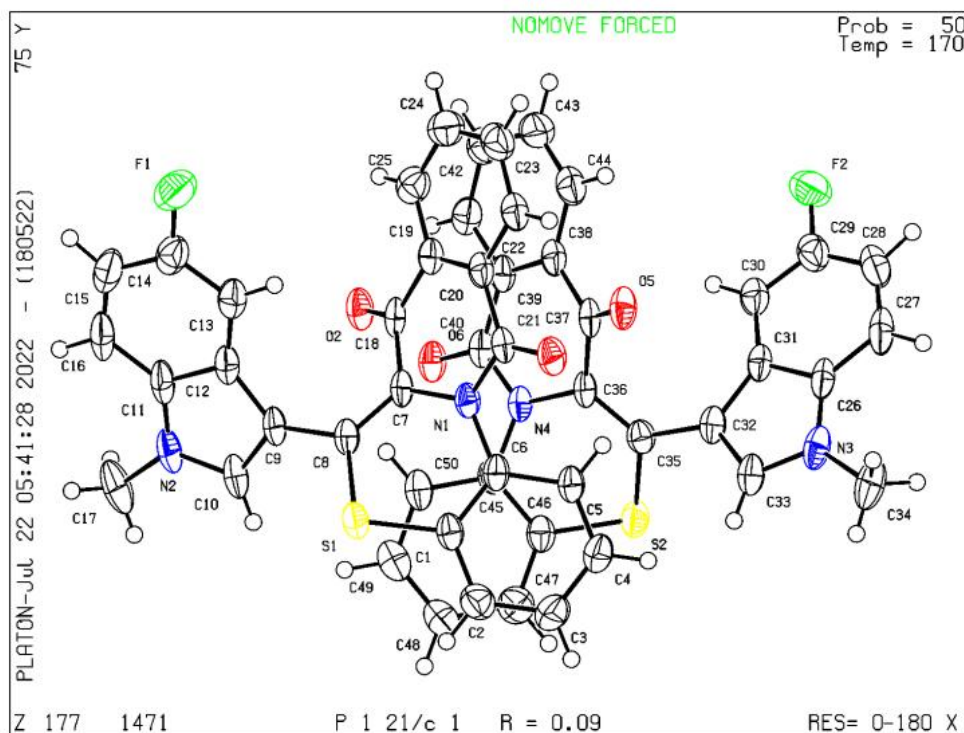

**Figure S1.** Ellipsoid plot of **3ia** ( shown at 50% probability levels)

**Table S1.** Crystal data and structure refinement for **3ia**.

|                                        |                                                                  |
|----------------------------------------|------------------------------------------------------------------|
| Identification code                    | <b>3ia</b>                                                       |
| Empirical formula                      | C <sub>25</sub> H <sub>15</sub> FN <sub>2</sub> O <sub>2</sub> S |
| Formula weight                         | 426.45                                                           |
| Temperature/K                          | 170.00(10)                                                       |
| Crystal system                         | monoclinic                                                       |
| Space group                            | P21/c                                                            |
| a/Å                                    | 7.8743(5)                                                        |
| b/Å                                    | 20.4362(15)                                                      |
| c/Å                                    | 24.2525(11)                                                      |
| $\alpha$ /°                            | 90                                                               |
| $\beta$ /°                             | 93.218(4)                                                        |
| $\gamma$ /°                            | 90                                                               |
| Volume/Å <sup>3</sup>                  | 3896.6(4)                                                        |
| Z                                      | 8                                                                |
| $\rho_{\text{calc}}/\text{cm}^3$       | 1.454                                                            |
| $\mu/\text{mm}^{-1}$                   | 1.782                                                            |
| F(000)                                 | 1760.0                                                           |
| Crystal size/mm <sup>3</sup>           | 0.15 × 0.13 × 0.1                                                |
| Radiation                              | Cu K $\alpha$ ( $\lambda$ = 1.54184)                             |
| 2 $\theta$ range for data collection/° | 5.658 to 149.362                                                 |
| Index ranges                           | -9 ≤ h ≤ 6, -23 ≤ k ≤ 25, -28 ≤ l ≤ 30                           |
| Reflections collected                  | 15433                                                            |
| Independent reflections                | 7670 [R <sub>int</sub> = 0.0545, R <sub>sigma</sub> = 0.0609]    |
| Data/restraints/parameters             | 7670/0/561                                                       |
| Goodness-of-fit on F <sup>2</sup>      | 1.065                                                            |
| Final R indexes [I ≥ 2 $\sigma$ (I)]   | R <sub>1</sub> = 0.0865, wR <sub>2</sub> = 0.2183                |
| Final R indexes [all data]             | R <sub>1</sub> = 0.1154, wR <sub>2</sub> = 0.2396                |

Crystal structure determination of **3ia**

Crystal Data for C<sub>25</sub>H<sub>15</sub>FN<sub>2</sub>O<sub>2</sub>S (M = 426.45 g/mol): monoclinic, space group P21/c (no. 14), a = 7.8743(5) Å, b = 20.4362(15) Å, c = 24.2525(11) Å,  $\beta$  = 93.218(4)°, V = 3896.6(4) Å<sup>3</sup>, Z = 8, T = 170.00(10) K,  $\mu$ (Cu K $\alpha$ ) = 1.782 mm<sup>-1</sup>, D<sub>calc</sub> = 1.454 g/cm<sup>3</sup>, 15433 reflections measured (5.658° ≤ 2 $\theta$  ≤ 149.362°), 7670 unique (R<sub>int</sub> = 0.0545, R<sub>sigma</sub> = 0.0609) which were used in all

calculations. The final R1 was 0.0865 ( $I > 2\sigma(I)$ ) and wR2 was 0.2396 (all data).

**Table S2.** Fractional Atomic Coordinates ( $\times 10^4$ ) and Equivalent Isotropic Displacement Parameters ( $\text{\AA}^2 \times 10^3$ ) for **3ia**.  $U_{\text{eq}}$  is defined as 1/3 of the trace of the orthogonalised  $U_{ij}$  tensor.

| Atom | x          | y          | z          | U(eq)    |
|------|------------|------------|------------|----------|
| S1   | 8638.4(15) | 6294.7(6)  | 6911.6(4)  | 38.9(3)  |
| O1   | 8747(4)    | 7691.3(17) | 5263.5(12) | 41.2(8)  |
| O2   | 5456(4)    | 8197.5(18) | 7082.2(12) | 42.7(8)  |
| F1   | 10037(5)   | 9348.2(17) | 8104.5(15) | 67.9(10) |
| N1   | 7645(5)    | 7328.0(19) | 6056.7(13) | 32.0(8)  |
| N2   | 7083(5)    | 7002(2)    | 8516.8(14) | 44.0(10) |
| C1   | 7917(5)    | 6153(2)    | 6223.2(16) | 34.2(9)  |
| C2   | 7788(7)    | 5509(3)    | 6039(2)    | 46.0(12) |
| C3   | 7230(7)    | 5379(3)    | 5495(2)    | 49.4(12) |
| C4   | 6725(6)    | 5893(3)    | 5150.4(19) | 42.6(11) |
| C5   | 6803(5)    | 6528(2)    | 5333.5(16) | 34.4(10) |
| C6   | 7470(5)    | 6666(2)    | 5870.2(16) | 32.9(9)  |
| C7   | 7238(5)    | 7463(2)    | 6616.4(15) | 31.7(9)  |
| C8   | 7674(5)    | 7050(2)    | 7036.4(16) | 31.9(9)  |
| C9   | 7556(6)    | 7179(2)    | 7622.2(16) | 34.8(10) |
| C10  | 6986(6)    | 6743(3)    | 8002.8(17) | 42.1(11) |
| C11  | 7759(6)    | 7625(3)    | 8485.3(17) | 44.5(12) |
| C12  | 8089(6)    | 7753(2)    | 7931.2(16) | 36.8(10) |
| C13  | 8850(6)    | 8347(3)    | 7795.8(19) | 42.4(11) |
| C14  | 9260(7)    | 8766(3)    | 8224(2)    | 48.8(13) |
| C15  | 8935(8)    | 8651(3)    | 8774(2)    | 58.7(16) |
| C16  | 8203(7)    | 8065(3)    | 8910.3(19) | 54.3(15) |
| C17  | 6460(7)    | 6699(4)    | 9009(2)    | 61.8(17) |
| C18  | 6433(5)    | 8108(2)    | 6715.5(15) | 34.1(10) |
| C19  | 6993(6)    | 8643(2)    | 6354.0(17) | 35.5(10) |
| C20  | 7829(6)    | 8497(2)    | 5881.6(17) | 34.8(10) |
| C21  | 8144(5)    | 7812(2)    | 5705.8(16) | 32.8(9)  |
| C22  | 8329(6)    | 9007(2)    | 5542.7(18) | 39.3(10) |
| C23  | 8012(7)    | 9647(3)    | 5685(2)    | 49.5(13) |

|     |            |            |            |          |
|-----|------------|------------|------------|----------|
| C24 | 7195(7)    | 9789(3)    | 6165(2)    | 49.2(12) |
| C25 | 6677(6)    | 9291(3)    | 6498(2)    | 44.5(11) |
| S2  | 1567.5(15) | 6184.5(6)  | 5307.9(4)  | 39.9(3)  |
| F2  | 86(4)      | 9085.3(16) | 3907.5(14) | 62.3(9)  |
| O5  | 4674(4)    | 8091.0(18) | 5041.4(12) | 43.7(8)  |
| O6  | 1465(4)    | 7690.8(17) | 6883.1(11) | 40.1(8)  |
| N3  | 3257(5)    | 6749(2)    | 3669.8(15) | 44.6(10) |
| N4  | 2539(5)    | 7271.8(19) | 6098.7(13) | 32.9(8)  |
| C26 | 2563(6)    | 7369(3)    | 3656.7(17) | 40.3(11) |
| C27 | 2190(7)    | 7771(3)    | 3203.4(18) | 51.8(14) |
| C28 | 1406(7)    | 8359(3)    | 3298(2)    | 52.7(14) |
| C29 | 963(7)     | 8508(3)    | 3832(2)    | 47.5(12) |
| C30 | 1329(6)    | 8135(2)    | 4286.5(18) | 39.3(10) |
| C31 | 2158(5)    | 7538(2)    | 4195.1(16) | 33.7(10) |
| C32 | 2687(6)    | 7000(2)    | 4548.2(16) | 35.5(10) |
| C33 | 3320(6)    | 6535(3)    | 4202.9(17) | 41.2(11) |
| C34 | 3881(7)    | 6399(3)    | 3199(2)    | 58.1(16) |
| C35 | 2529(5)    | 6924(2)    | 5142.5(17) | 33.4(9)  |
| C36 | 2930(5)    | 7376(2)    | 5536.3(15) | 32.5(9)  |
| C37 | 3683(6)    | 8018(2)    | 5403.8(16) | 35.5(10) |
| C38 | 3074(6)    | 8575(2)    | 5724.7(17) | 35.9(10) |
| C39 | 2263(5)    | 8455(2)    | 6213.3(17) | 34.5(10) |
| C40 | 2040(5)    | 7786(2)    | 6431.6(16) | 33.4(9)  |
| C41 | 1740(6)    | 8988(3)    | 6525.6(19) | 41.7(11) |
| C42 | 1977(7)    | 9616(3)    | 6342(2)    | 48.6(12) |
| C43 | 2712(7)    | 9732(3)    | 5844(2)    | 51.2(13) |
| C44 | 3285(7)    | 9215(3)    | 5540(2)    | 44.9(12) |
| C45 | 2788(6)    | 6630(2)    | 6324.1(17) | 35.8(10) |
| C46 | 2356(6)    | 6091(2)    | 5998.3(17) | 35.3(10) |
| C47 | 2567(7)    | 5460(3)    | 6207(2)    | 49.5(12) |
| C48 | 3184(7)    | 5368(3)    | 6751(2)    | 51.2(13) |
| C49 | 3656(7)    | 5913(3)    | 7069(2)    | 48.0(12) |
| C50 | 3493(6)    | 6540(3)    | 6858.3(17) | 38.9(10) |

**Table S3.** Anisotropic Displacement Parameters ( $\text{\AA}^2 \times 10^3$ ) for **3ia** The Anisotropic displacement factor exponent takes the form:  $-2\pi^2[h^2a^{*2}U_{11}+2hka^*b^*U_{12}+\dots]$ .

| Atom | U <sub>11</sub> | U <sub>22</sub> | U <sub>33</sub> | U <sub>23</sub> | U <sub>13</sub> | U <sub>12</sub> |
|------|-----------------|-----------------|-----------------|-----------------|-----------------|-----------------|
| S1   | 43.6(6)         | 48.7(7)         | 24.1(5)         | 3.2(4)          | -2.2(4)         | 3.6(5)          |
| O1   | 48.0(19)        | 53(2)           | 23.6(15)        | 2.1(13)         | 8.4(13)         | 2.0(16)         |
| O2   | 42.8(19)        | 63(2)           | 22.9(14)        | -1.4(14)        | 4.0(12)         | 12.3(16)        |
| F1   | 71(2)           | 56(2)           | 75(2)           | -18.7(17)       | -13.6(18)       | 0.8(17)         |
| N1   | 33.6(19)        | 44(2)           | 18.8(16)        | -0.1(14)        | 6.1(13)         | 3.8(16)         |
| N2   | 44(2)           | 70(3)           | 18.4(17)        | 7.6(17)         | 3.8(15)         | 10(2)           |
| C1   | 30(2)           | 49(3)           | 23.7(19)        | 1.5(17)         | 3.5(15)         | 3.8(19)         |
| C2   | 51(3)           | 46(3)           | 41(3)           | 5(2)            | 5(2)            | 2(2)            |
| C3   | 62(3)           | 45(3)           | 41(3)           | -9(2)           | 6(2)            | 0(2)            |
| C4   | 45(3)           | 52(3)           | 31(2)           | -9(2)           | 1.2(18)         | 2(2)            |
| C5   | 33(2)           | 48(3)           | 22.7(19)        | -1.1(17)        | 3.4(16)         | 2.1(19)         |
| C6   | 28(2)           | 48(3)           | 22.6(19)        | -2.7(17)        | 3.4(15)         | 2.6(18)         |
| C7   | 30(2)           | 49(3)           | 16.3(17)        | -0.7(16)        | 1.7(14)         | -2.3(18)        |
| C8   | 28(2)           | 47(3)           | 20.7(19)        | 0.0(16)         | 2.4(15)         | -1.2(18)        |
| C9   | 34(2)           | 54(3)           | 16.7(18)        | 1.8(17)         | 2.4(15)         | 3(2)            |
| C10  | 36(2)           | 70(3)           | 20(2)           | 7(2)            | 1.2(16)         | 1(2)            |
| C11  | 45(3)           | 70(4)           | 18(2)           | -3(2)           | -0.3(17)        | 22(3)           |
| C12  | 34(2)           | 55(3)           | 21(2)           | -2.2(18)        | -0.9(16)        | 11(2)           |
| C13  | 37(3)           | 57(3)           | 32(2)           | -5(2)           | -4.8(18)        | 6(2)            |
| C14  | 45(3)           | 54(3)           | 46(3)           | -12(2)          | -11(2)          | 11(2)           |
| C15  | 64(4)           | 68(4)           | 41(3)           | -22(3)          | -19(2)          | 25(3)           |
| C16  | 54(3)           | 86(4)           | 21(2)           | -9(2)           | -6(2)           | 30(3)           |
| C17  | 52(3)           | 106(5)          | 29(2)           | 24(3)           | 13(2)           | 14(3)           |
| C18  | 30(2)           | 56(3)           | 16.2(18)        | -4.7(17)        | -3.4(15)        | 2.1(19)         |
| C19  | 33(2)           | 47(3)           | 26(2)           | -1.4(18)        | -6.4(16)        | 0.1(19)         |
| C20  | 32(2)           | 45(3)           | 26(2)           | 1.5(17)         | -7.8(16)        | -2.3(19)        |
| C21  | 30(2)           | 46(3)           | 21.1(19)        | 2.7(17)         | -4.7(15)        | 0.9(18)         |
| C22  | 36(2)           | 52(3)           | 29(2)           | 4.9(19)         | -4.3(17)        | -5(2)           |
| C23  | 48(3)           | 51(3)           | 48(3)           | 9(2)            | -13(2)          | -7(2)           |
| C24  | 45(3)           | 45(3)           | 56(3)           | -2(2)           | -9(2)           | 1(2)            |
| C25  | 38(3)           | 49(3)           | 46(3)           | -5(2)           | -5(2)           | 1(2)            |

|     |          |          |          |          |           |           |
|-----|----------|----------|----------|----------|-----------|-----------|
| S2  | 46.4(7)  | 47.5(7)  | 25.9(5)  | -3.0(4)  | 1.0(4)    | -3.1(5)   |
| F2  | 64(2)    | 47.3(19) | 73(2)    | 13.0(16) | -15.8(16) | -3.2(16)  |
| O5  | 43.5(19) | 66(2)    | 21.8(14) | 0.0(14)  | 4.3(13)   | -10.8(17) |
| O6  | 40.1(18) | 59(2)    | 21.7(14) | -3.0(13) | 7.8(12)   | 1.7(15)   |
| N3  | 44(2)    | 67(3)    | 22.9(18) | -9.8(18) | 7.2(15)   | -11(2)    |
| N4  | 34(2)    | 45(2)    | 19.2(16) | -0.8(14) | 0.7(13)   | -1.2(16)  |
| C26 | 43(3)    | 59(3)    | 19.1(19) | -3.0(19) | -0.9(17)  | -16(2)    |
| C27 | 52(3)    | 81(4)    | 21(2)    | 2(2)     | -2.5(19)  | -26(3)    |
| C28 | 54(3)    | 65(4)    | 37(3)    | 18(2)    | -12(2)    | -21(3)    |
| C29 | 48(3)    | 51(3)    | 42(3)    | 8(2)     | -10(2)    | -13(2)    |
| C30 | 36(2)    | 51(3)    | 31(2)    | 0.9(19)  | -3.9(17)  | -6(2)     |
| C31 | 29(2)    | 49(3)    | 22.4(19) | -2.4(17) | -2.5(15)  | -7.9(19)  |
| C32 | 33(2)    | 50(3)    | 23(2)    | -3.5(18) | 3.0(16)   | -1(2)     |
| C33 | 38(3)    | 61(3)    | 24(2)    | -5.1(19) | 2.8(17)   | 0(2)      |
| C34 | 52(3)    | 93(5)    | 30(2)    | -20(3)   | 12(2)     | -10(3)    |
| C35 | 32(2)    | 41(3)    | 27(2)    | 0.8(17)  | 4.1(16)   | 2.5(18)   |
| C36 | 34(2)    | 47(3)    | 16.6(18) | -0.2(16) | 1.7(15)   | 0.8(19)   |
| C37 | 32(2)    | 55(3)    | 18.1(18) | 0.6(17)  | -5.9(15)  | -1(2)     |
| C38 | 33(2)    | 48(3)    | 25(2)    | 1.7(18)  | -7.0(16)  | -3.0(19)  |
| C39 | 26(2)    | 49(3)    | 27(2)    | -1.0(18) | -6.5(15)  | 2.0(19)   |
| C40 | 27(2)    | 51(3)    | 22.1(19) | -1.5(17) | 1.0(15)   | -0.3(19)  |
| C41 | 41(3)    | 50(3)    | 34(2)    | -5(2)    | -3.5(18)  | 2(2)      |
| C42 | 47(3)    | 50(3)    | 47(3)    | -4(2)    | -11(2)    | 5(2)      |
| C43 | 55(3)    | 44(3)    | 52(3)    | 3(2)     | -12(2)    | -1(2)     |
| C44 | 45(3)    | 54(3)    | 35(2)    | 6(2)     | -7.0(19)  | -2(2)     |
| C45 | 37(2)    | 45(3)    | 26(2)    | 2.8(18)  | 9.2(17)   | -2(2)     |
| C46 | 30(2)    | 48(3)    | 27(2)    | 0.7(18)  | 3.8(16)   | -3.9(19)  |
| C47 | 53(3)    | 50(3)    | 46(3)    | 1(2)     | 5(2)      | -4(2)     |
| C48 | 54(3)    | 53(3)    | 47(3)    | 15(2)    | -1(2)     | 1(3)      |
| C49 | 44(3)    | 59(3)    | 40(3)    | 12(2)    | -1(2)     | 0(2)      |
| C50 | 31(2)    | 59(3)    | 26(2)    | 2.4(19)  | 2.0(16)   | 0(2)      |

**Table S4.** Bond Lengths for **3ia**.

| Atom | Atom | Length/Å | Atom | Atom | Length/Å |
|------|------|----------|------|------|----------|
| S1   | C1   | 1.757(4) | S2   | C35  | 1.747(5) |
| S1   | C8   | 1.754(5) | S2   | C46  | 1.763(4) |
| O1   | C21  | 1.222(5) | F2   | C29  | 1.384(7) |
| O2   | C18  | 1.222(5) | O5   | C37  | 1.217(5) |
| F1   | C14  | 1.377(7) | O6   | C40  | 1.224(5) |
| N1   | C6   | 1.431(6) | N3   | C26  | 1.380(7) |
| N1   | C7   | 1.439(5) | N3   | C33  | 1.363(6) |
| N1   | C21  | 1.377(6) | N3   | C34  | 1.456(6) |
| N2   | C10  | 1.353(6) | N4   | C36  | 1.431(5) |
| N2   | C11  | 1.383(7) | N4   | C40  | 1.395(6) |
| N2   | C17  | 1.455(6) | N4   | C45  | 1.430(6) |
| C1   | C2   | 1.392(7) | C26  | C27  | 1.391(7) |
| C1   | C6   | 1.386(6) | C26  | C31  | 1.404(6) |
| C2   | C3   | 1.392(7) | C27  | C28  | 1.375(8) |
| C3   | C4   | 1.386(7) | C28  | C29  | 1.395(8) |
| C4   | C5   | 1.372(7) | C29  | C30  | 1.358(7) |
| C5   | C6   | 1.404(6) | C30  | C31  | 1.408(7) |
| C7   | C8   | 1.353(6) | C31  | C32  | 1.441(6) |
| C7   | C18  | 1.487(6) | C32  | C33  | 1.378(6) |
| C8   | C9   | 1.453(5) | C32  | C35  | 1.462(5) |
| C9   | C10  | 1.377(6) | C35  | C36  | 1.354(6) |
| C9   | C12  | 1.441(7) | C36  | C37  | 1.482(7) |
| C11  | C12  | 1.408(6) | C37  | C38  | 1.474(6) |
| C11  | C16  | 1.398(7) | C38  | C39  | 1.399(6) |
| C12  | C13  | 1.401(7) | C38  | C44  | 1.395(7) |
| C13  | C14  | 1.370(7) | C39  | C40  | 1.481(7) |
| C14  | C15  | 1.391(8) | C39  | C41  | 1.402(6) |
| C15  | C16  | 1.377(9) | C41  | C42  | 1.374(7) |
| C18  | C19  | 1.485(6) | C42  | C43  | 1.389(8) |
| C19  | C20  | 1.385(6) | C43  | C44  | 1.379(8) |
| C19  | C25  | 1.395(7) | C45  | C46  | 1.386(6) |
| C20  | C21  | 1.489(6) | C45  | C50  | 1.393(6) |



|     |     |          |     |     |          |
|-----|-----|----------|-----|-----|----------|
| C20 | C22 | 1.397(6) | C46 | C47 | 1.393(7) |
| C22 | C23 | 1.378(7) | C47 | C48 | 1.394(7) |
| C23 | C24 | 1.393(8) | C48 | C49 | 1.393(8) |
| C24 | C25 | 1.375(7) | C49 | C50 | 1.383(7) |

**Table S5.** Bond Angles for **3ia**.

| Atom | Atom | Atom | Angle/°  | Atom | Atom | Atom | Angle/°  |
|------|------|------|----------|------|------|------|----------|
| C8   | S1   | C1   | 100.9(2) | C35  | S2   | C46  | 100.2(2) |
| C6   | N1   | C7   | 117.2(4) | C26  | N3   | C34  | 125.7(4) |
| C21  | N1   | C6   | 120.7(3) | C33  | N3   | C26  | 108.1(4) |
| C21  | N1   | C7   | 122.1(4) | C33  | N3   | C34  | 126.1(5) |
| C10  | N2   | C11  | 108.2(4) | C40  | N4   | C36  | 121.5(4) |
| C10  | N2   | C17  | 125.8(5) | C40  | N4   | C45  | 120.4(3) |
| C11  | N2   | C17  | 125.9(5) | C45  | N4   | C36  | 118.0(4) |
| C2   | C1   | S1   | 118.3(4) | N3   | C26  | C27  | 128.8(5) |
| C6   | C1   | S1   | 121.3(4) | N3   | C26  | C31  | 108.3(4) |
| C6   | C1   | C2   | 120.3(4) | C27  | C26  | C31  | 122.8(5) |
| C1   | C2   | C3   | 119.9(5) | C28  | C27  | C26  | 117.5(5) |
| C4   | C3   | C2   | 119.4(5) | C27  | C28  | C29  | 118.9(5) |
| C5   | C4   | C3   | 121.0(4) | F2   | C29  | C28  | 117.5(5) |
| C4   | C5   | C6   | 119.8(4) | C30  | C29  | F2   | 117.1(5) |
| C1   | C6   | N1   | 120.2(4) | C30  | C29  | C28  | 125.4(6) |
| C1   | C6   | C5   | 119.3(4) | C29  | C30  | C31  | 116.0(5) |
| C5   | C6   | N1   | 120.5(4) | C26  | C31  | C30  | 119.4(4) |
| N1   | C7   | C18  | 116.2(4) | C26  | C31  | C32  | 107.0(4) |
| C8   | C7   | N1   | 122.0(4) | C30  | C31  | C32  | 133.6(4) |
| C8   | C7   | C18  | 121.6(4) | C31  | C32  | C35  | 129.0(4) |
| C7   | C8   | S1   | 120.9(3) | C33  | C32  | C31  | 105.5(4) |
| C7   | C8   | C9   | 126.5(4) | C33  | C32  | C35  | 125.4(4) |
| C9   | C8   | S1   | 112.4(3) | N3   | C33  | C32  | 111.1(5) |
| C10  | C9   | C8   | 125.3(5) | C32  | C35  | S2   | 112.4(3) |
| C10  | C9   | C12  | 106.0(4) | C36  | C35  | S2   | 121.0(3) |
| C12  | C9   | C8   | 128.6(4) | C36  | C35  | C32  | 126.4(4) |
| N2   | C10  | C9   | 111.1(5) | N4   | C36  | C37  | 116.7(4) |

|     |     |     |          |     |     |     |          |
|-----|-----|-----|----------|-----|-----|-----|----------|
| N2  | C11 | C12 | 108.5(4) | C35 | C36 | N4  | 121.1(4) |
| N2  | C11 | C16 | 129.2(5) | C35 | C36 | C37 | 122.1(4) |
| C16 | C11 | C12 | 122.1(6) | O5  | C37 | C36 | 123.1(4) |
| C11 | C12 | C9  | 106.3(4) | O5  | C37 | C38 | 121.8(4) |
| C13 | C12 | C9  | 134.4(4) | C38 | C37 | C36 | 115.1(4) |
| C13 | C12 | C11 | 119.3(4) | C39 | C38 | C37 | 119.3(4) |
| C14 | C13 | C12 | 116.6(5) | C44 | C38 | C37 | 120.4(4) |
| F1  | C14 | C15 | 117.1(5) | C44 | C38 | C39 | 120.3(5) |
| C13 | C14 | F1  | 117.9(5) | C38 | C39 | C40 | 122.3(4) |
| C13 | C14 | C15 | 125.0(6) | C38 | C39 | C41 | 118.9(5) |
| C16 | C15 | C14 | 118.6(5) | C41 | C39 | C40 | 118.7(4) |
| C15 | C16 | C11 | 118.3(5) | O6  | C40 | N4  | 121.9(4) |
| O2  | C18 | C7  | 122.8(4) | O6  | C40 | C39 | 121.6(4) |
| O2  | C18 | C19 | 122.7(4) | N4  | C40 | C39 | 116.5(4) |
| C19 | C18 | C7  | 114.4(4) | C42 | C41 | C39 | 120.1(5) |
| C20 | C19 | C18 | 120.0(4) | C41 | C42 | C43 | 120.8(5) |
| C20 | C19 | C25 | 120.8(5) | C44 | C43 | C42 | 119.9(5) |
| C25 | C19 | C18 | 119.2(4) | C43 | C44 | C38 | 119.8(5) |
| C19 | C20 | C21 | 122.3(4) | C46 | C45 | N4  | 119.1(4) |
| C19 | C20 | C22 | 119.3(5) | C46 | C45 | C50 | 119.9(4) |
| C22 | C20 | C21 | 118.4(4) | C50 | C45 | N4  | 121.0(4) |
| O1  | C21 | N1  | 122.4(4) | C45 | C46 | S2  | 121.2(4) |
| O1  | C21 | C20 | 121.4(4) | C45 | C46 | C47 | 120.6(4) |
| N1  | C21 | C20 | 116.2(4) | C47 | C46 | S2  | 118.2(4) |
| C23 | C22 | C20 | 119.9(5) | C48 | C47 | C46 | 119.8(5) |
| C22 | C23 | C24 | 120.4(5) | C49 | C48 | C47 | 119.0(5) |
| C25 | C24 | C23 | 120.2(5) | C50 | C49 | C48 | 121.3(5) |
| C24 | C25 | C19 | 119.5(5) | C49 | C50 | C45 | 119.3(5) |

**Table S6.** Torsion Angles for **3ia**.

| <b>A</b> | <b>B</b> | <b>C</b> | <b>D</b> | <b>Angle/°</b> | <b>A</b> | <b>B</b> | <b>C</b> | <b>D</b> | <b>Angle/°</b> |
|----------|----------|----------|----------|----------------|----------|----------|----------|----------|----------------|
| S1       | C1       | C2       | C3       | -179.7(4)      | S2       | C35      | C36      | N4       | -1.7(6)        |
| S1       | C1       | C6       | N1       | 2.2(6)         | S2       | C35      | C36      | C37      | -177.5(3)      |
| S1       | C1       | C6       | C5       | -176.2(3)      | S2       | C46      | C47      | C48      | -179.9(4)      |
| S1       | C8       | C9       | C10      | -47.0(6)       | F2       | C29      | C30      | C31      | 177.4(4)       |
| S1       | C8       | C9       | C12      | 128.7(4)       | O5       | C37      | C38      | C39      | -165.4(4)      |
| O2       | C18      | C19      | C20      | -167.6(4)      | O5       | C37      | C38      | C44      | 15.5(6)        |
| O2       | C18      | C19      | C25      | 12.8(6)        | N3       | C26      | C27      | C28      | 176.3(5)       |
| F1       | C14      | C15      | C16      | -178.2(5)      | N3       | C26      | C31      | C30      | -176.0(4)      |
| N1       | C7       | C8       | S1       | -4.4(6)        | N3       | C26      | C31      | C32      | 1.9(5)         |
| N1       | C7       | C8       | C9       | 170.3(4)       | N4       | C36      | C37      | O5       | 149.1(4)       |
| N1       | C7       | C18      | O2       | 150.9(4)       | N4       | C36      | C37      | C38      | -33.9(5)       |
| N1       | C7       | C18      | C19      | -32.6(5)       | N4       | C45      | C46      | S2       | 1.9(6)         |
| N2       | C11      | C12      | C9       | 0.8(5)         | N4       | C45      | C46      | C47      | -179.4(4)      |
| N2       | C11      | C12      | C13      | -177.4(4)      | N4       | C45      | C50      | C49      | 177.6(4)       |
| N2       | C11      | C16      | C15      | 177.0(5)       | C26      | N3       | C33      | C32      | -0.2(6)        |
| C1       | S1       | C8       | C7       | -24.9(4)       | C26      | C27      | C28      | C29      | -2.7(7)        |
| C1       | S1       | C8       | C9       | 159.8(3)       | C26      | C31      | C32      | C33      | -1.9(5)        |
| C1       | C2       | C3       | C4       | -3.3(8)        | C26      | C31      | C32      | C35      | -178.9(4)      |
| C2       | C1       | C6       | N1       | -178.4(4)      | C27      | C26      | C31      | C30      | 0.4(7)         |
| C2       | C1       | C6       | C5       | 3.2(7)         | C27      | C26      | C31      | C32      | 178.3(4)       |
| C2       | C3       | C4       | C5       | 1.5(8)         | C27      | C28      | C29      | F2       | -176.3(4)      |
| C3       | C4       | C5       | C6       | 2.7(7)         | C27      | C28      | C29      | C30      | 4.1(8)         |
| C4       | C5       | C6       | N1       | 176.6(4)       | C28      | C29      | C30      | C31      | -2.9(8)        |
| C4       | C5       | C6       | C1       | -5.0(7)        | C29      | C30      | C31      | C26      | 0.6(6)         |
| C6       | N1       | C7       | C8       | 39.8(6)        | C29      | C30      | C31      | C32      | -176.6(5)      |
| C6       | N1       | C7       | C18      | -144.8(4)      | C30      | C31      | C32      | C33      | 175.5(5)       |
| C6       | N1       | C21      | O1       | -13.5(6)       | C30      | C31      | C32      | C35      | -1.4(8)        |
| C6       | N1       | C21      | C20      | 163.5(4)       | C31      | C26      | C27      | C28      | 0.7(7)         |
| C6       | C1       | C2       | C3       | 0.9(7)         | C31      | C32      | C33      | N3       | 1.3(5)         |
| C7       | N1       | C6       | C1       | -38.1(6)       | C31      | C32      | C35      | S2       | 128.0(4)       |
| C7       | N1       | C6       | C5       | 140.3(4)       | C31      | C32      | C35      | C36      | -46.9(7)       |
| C7       | N1       | C21      | O1       | 168.1(4)       | C32      | C35      | C36      | N4       | 172.8(4)       |

|     |     |     |     |           |     |     |     |     |           |
|-----|-----|-----|-----|-----------|-----|-----|-----|-----|-----------|
| C7  | N1  | C21 | C20 | -14.9(6)  | C32 | C35 | C36 | C37 | -3.0(7)   |
| C7  | C8  | C9  | C10 | 138.0(5)  | C33 | N3  | C26 | C27 | -177.3(5) |
| C7  | C8  | C9  | C12 | -46.3(7)  | C33 | N3  | C26 | C31 | -1.1(5)   |
| C7  | C18 | C19 | C20 | 15.9(5)   | C33 | C32 | C35 | S2  | -48.4(6)  |
| C7  | C18 | C19 | C25 | -163.7(4) | C33 | C32 | C35 | C36 | 136.7(5)  |
| C8  | S1  | C1  | C2  | -153.4(4) | C34 | N3  | C26 | C27 | 5.2(8)    |
| C8  | S1  | C1  | C6  | 25.9(4)   | C34 | N3  | C26 | C31 | -178.6(4) |
| C8  | C7  | C18 | O2  | -33.7(7)  | C34 | N3  | C33 | C32 | 177.3(4)  |
| C8  | C7  | C18 | C19 | 142.7(4)  | C35 | S2  | C46 | C45 | 28.0(4)   |
| C8  | C9  | C10 | N2  | 177.9(4)  | C35 | S2  | C46 | C47 | -150.8(4) |
| C8  | C9  | C12 | C11 | -177.7(4) | C35 | C32 | C33 | N3  | 178.4(4)  |
| C8  | C9  | C12 | C13 | 0.1(9)    | C35 | C36 | C37 | O5  | -34.9(7)  |
| C9  | C12 | C13 | C14 | -176.2(5) | C35 | C36 | C37 | C38 | 142.0(4)  |
| C10 | N2  | C11 | C12 | 0.1(5)    | C36 | N4  | C40 | O6  | 169.1(4)  |
| C10 | N2  | C11 | C16 | -175.3(5) | C36 | N4  | C40 | C39 | -11.7(6)  |
| C10 | C9  | C12 | C11 | -1.4(5)   | C36 | N4  | C45 | C46 | -39.7(6)  |
| C10 | C9  | C12 | C13 | 176.4(5)  | C36 | N4  | C45 | C50 | 138.7(4)  |
| C11 | N2  | C10 | C9  | -1.0(6)   | C36 | C37 | C38 | C39 | 17.6(5)   |
| C11 | C12 | C13 | C14 | 1.3(7)    | C36 | C37 | C38 | C44 | -161.5(4) |
| C12 | C9  | C10 | N2  | 1.5(5)    | C37 | C38 | C39 | C40 | 2.0(6)    |
| C12 | C11 | C16 | C15 | 2.2(7)    | C37 | C38 | C39 | C41 | 177.9(4)  |
| C12 | C13 | C14 | F1  | 178.9(4)  | C37 | C38 | C44 | C43 | -179.9(4) |
| C12 | C13 | C14 | C15 | -1.9(8)   | C38 | C39 | C40 | O6  | 173.4(4)  |
| C13 | C14 | C15 | C16 | 2.6(8)    | C38 | C39 | C40 | N4  | -5.8(6)   |
| C14 | C15 | C16 | C11 | -2.6(8)   | C38 | C39 | C41 | C42 | 2.1(7)    |
| C16 | C11 | C12 | C9  | 176.6(4)  | C39 | C38 | C44 | C43 | 0.9(7)    |
| C16 | C11 | C12 | C13 | -1.6(7)   | C39 | C41 | C42 | C43 | 0.9(7)    |
| C17 | N2  | C10 | C9  | 174.6(4)  | C40 | N4  | C36 | C35 | -144.0(4) |
| C17 | N2  | C11 | C12 | -175.5(4) | C40 | N4  | C36 | C37 | 32.0(6)   |
| C17 | N2  | C11 | C16 | 9.1(8)    | C40 | N4  | C45 | C46 | 144.5(4)  |
| C18 | C7  | C8  | S1  | -179.5(3) | C40 | N4  | C45 | C50 | -37.1(6)  |
| C18 | C7  | C8  | C9  | -4.9(7)   | C40 | C39 | C41 | C42 | 178.1(4)  |
| C18 | C19 | C20 | C21 | 2.2(6)    | C41 | C39 | C40 | O6  | -2.4(6)   |
| C18 | C19 | C20 | C22 | 179.2(4)  | C41 | C39 | C40 | N4  | 178.4(4)  |
| C18 | C19 | C25 | C24 | 179.9(4)  | C41 | C42 | C43 | C44 | -3.0(8)   |

|     |     |     |     |           |     |     |     |     |           |
|-----|-----|-----|-----|-----------|-----|-----|-----|-----|-----------|
| C19 | C20 | C21 | O1  | 173.4(4)  | C42 | C43 | C44 | C38 | 2.1(8)    |
| C19 | C20 | C21 | N1  | -3.6(6)   | C44 | C38 | C39 | C40 | -178.8(4) |
| C19 | C20 | C22 | C23 | 1.0(6)    | C44 | C38 | C39 | C41 | -3.0(6)   |
| C20 | C19 | C25 | C24 | 0.4(7)    | C45 | N4  | C36 | C35 | 40.3(6)   |
| C20 | C22 | C23 | C24 | 0.0(7)    | C45 | N4  | C36 | C37 | -143.7(4) |
| C21 | N1  | C6  | C1  | 143.4(4)  | C45 | N4  | C40 | O6  | -15.3(6)  |
| C21 | N1  | C6  | C5  | -38.2(6)  | C45 | N4  | C40 | C39 | 163.9(4)  |
| C21 | N1  | C7  | C8  | -141.7(4) | C45 | C46 | C47 | C48 | 1.3(8)    |
| C21 | N1  | C7  | C18 | 33.7(6)   | C46 | S2  | C35 | C32 | 156.6(3)  |
| C21 | C20 | C22 | C23 | 178.1(4)  | C46 | S2  | C35 | C36 | -28.2(4)  |
| C22 | C20 | C21 | O1  | -3.6(6)   | C46 | C45 | C50 | C49 | -4.0(7)   |
| C22 | C20 | C21 | N1  | 179.3(4)  | C46 | C47 | C48 | C49 | -3.0(8)   |
| C22 | C23 | C24 | C25 | -0.8(8)   | C47 | C48 | C49 | C50 | 1.2(8)    |
| C23 | C24 | C25 | C19 | 0.6(7)    | C48 | C49 | C50 | C45 | 2.3(8)    |
| C25 | C19 | C20 | C21 | -178.2(4) | C50 | C45 | C46 | S2  | -176.5(3) |
| C25 | C19 | C20 | C22 | -1.2(6)   | C50 | C45 | C46 | C47 | 2.2(7)    |

**Table S7.** Hydrogen Atom Coordinates ( $\text{\AA}\times 10^4$ ) and Isotropic Displacement Parameters ( $\text{\AA}^2\times 10^3$ ) for **3ia**.

| Atom | x       | y       | z       | U(eq) |
|------|---------|---------|---------|-------|
| H2   | 8074.1  | 5166.35 | 6278.67 | 55    |
| H3   | 7195.46 | 4950.89 | 5364.22 | 59    |
| H4   | 6327.1  | 5805.49 | 4789.59 | 51    |
| H5   | 6416.2  | 6866.17 | 5102.77 | 41    |
| H10  | 6586.77 | 6324.29 | 7917.74 | 51    |
| H13  | 9065.13 | 8452.52 | 7433.25 | 51    |
| H15  | 9206.52 | 8963.24 | 9043.64 | 70    |
| H16  | 8009.95 | 7964.74 | 9275.52 | 65    |
| H17A | 7358.87 | 6684.52 | 9293.29 | 93    |
| H17B | 6082.43 | 6262.17 | 8923.67 | 93    |
| H17C | 5527.99 | 6950.26 | 9135.71 | 93    |
| H22  | 8875.05 | 8914.67 | 5221.46 | 47    |

| <b>Atom</b> | <b>x</b> | <b>y</b> | <b>z</b> | <b>U(eq)</b> |
|-------------|----------|----------|----------|--------------|
| H23         | 8345.94  | 9985.25  | 5458.82  | 59           |
| H24         | 6998.04  | 10221.91 | 6260.79  | 59           |
| H25         | 6120.86  | 9385.24  | 6817.07  | 53           |
| H27         | 2460.26  | 7647.66  | 2849.87  | 62           |
| H28         | 1174.64  | 8652.17  | 3009.92  | 63           |
| H30         | 1048.46  | 8266.02  | 4637.13  | 47           |
| H33         | 3735.31  | 6128.47  | 4318.31  | 49           |
| H34A        | 3018.24  | 6396.54  | 2903.16  | 87           |
| H34B        | 4154.05  | 5957.15  | 3304.88  | 87           |
| H34C        | 4880.88  | 6612.62  | 3078.86  | 87           |
| H41         | 1232.54  | 8917.17  | 6857.45  | 50           |
| H42         | 1641.23  | 9967.29  | 6553.89  | 58           |
| H43         | 2817.19  | 10157.96 | 5715.59  | 61           |
| H44         | 3810.44  | 9292.15  | 5212.04  | 54           |
| H47         | 2296.65  | 5100.45  | 5983.24  | 59           |
| H48         | 3280.25  | 4949.31  | 6899.61  | 61           |
| H49         | 4088.96  | 5853.88  | 7430.39  | 58           |
| H50         | 3851.57  | 6898.31  | 7071     | 47           |

## 8. Copies of $^1\text{H}$ , $^{13}\text{C}$ and $^{19}\text{F}$ NMR spectra of all products

$^1\text{H}$  NMR (400 MHz) and  $^{13}\text{C}$  NMR (100 MHz) spectra of **3aa** ( $\text{CDCl}_3$ )

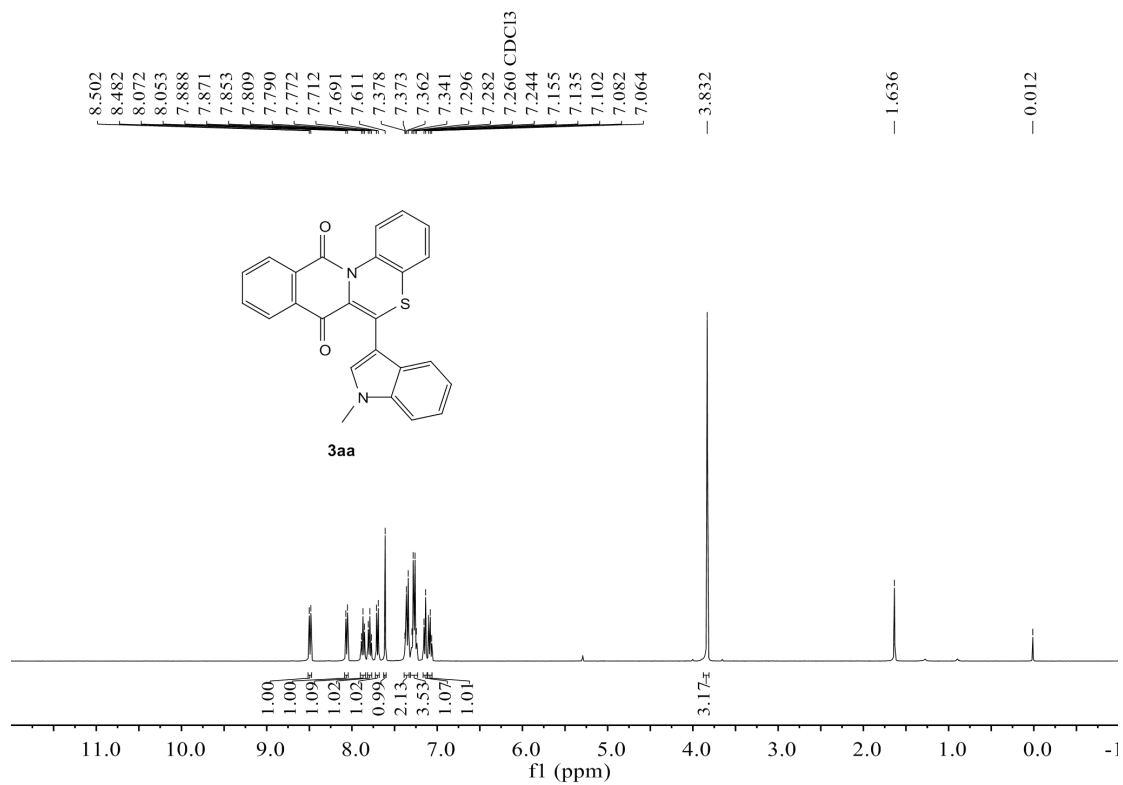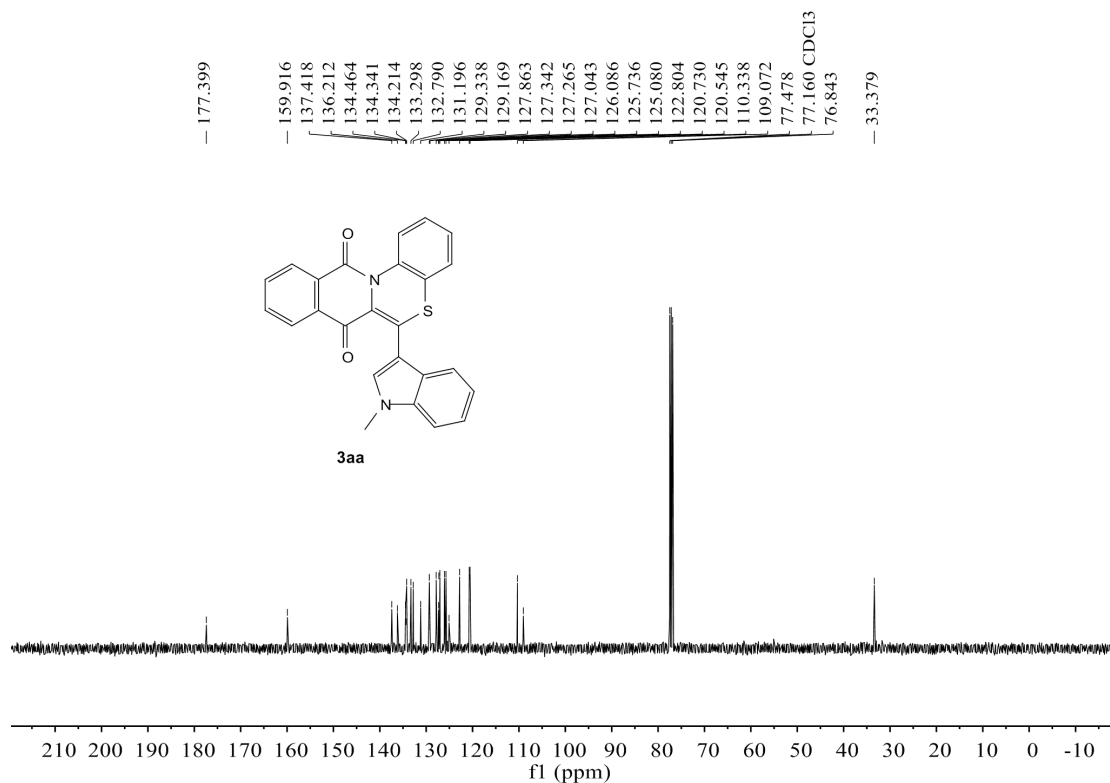

$^1\text{H}$  NMR (400 MHz) and  $^{13}\text{C}$  NMR (100 MHz) spectra of **3ab** ( $\text{CDCl}_3$ )

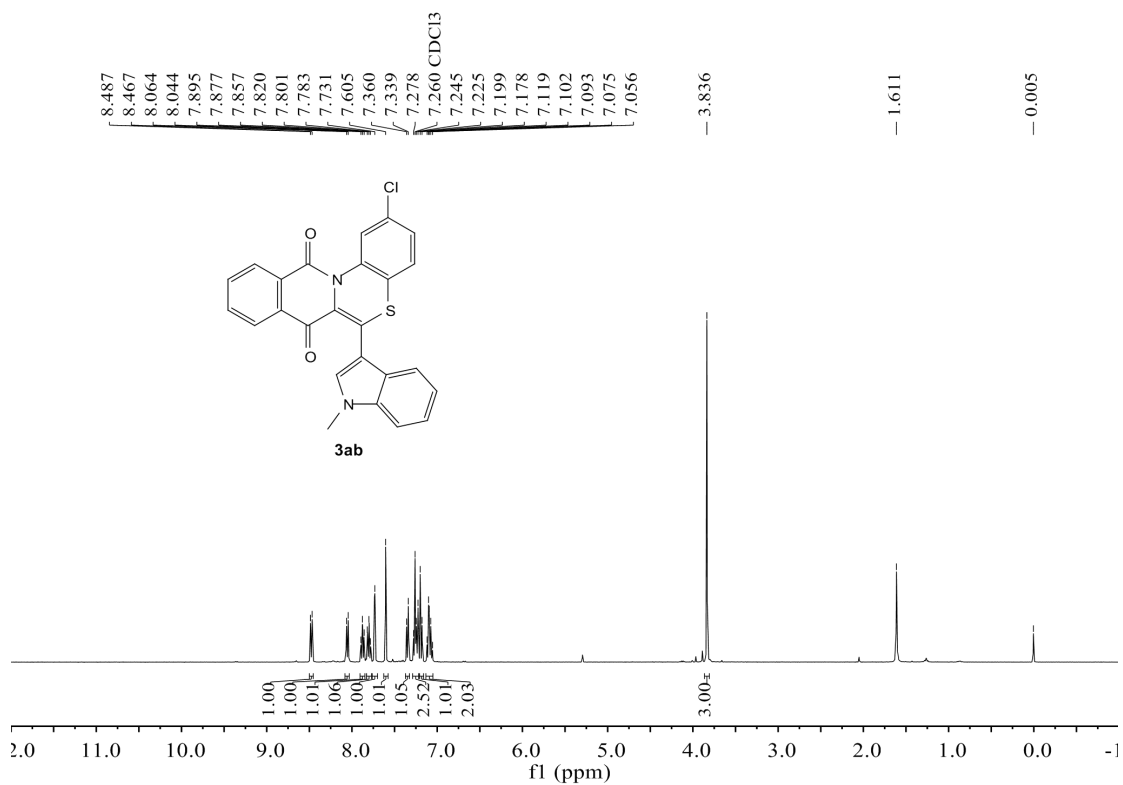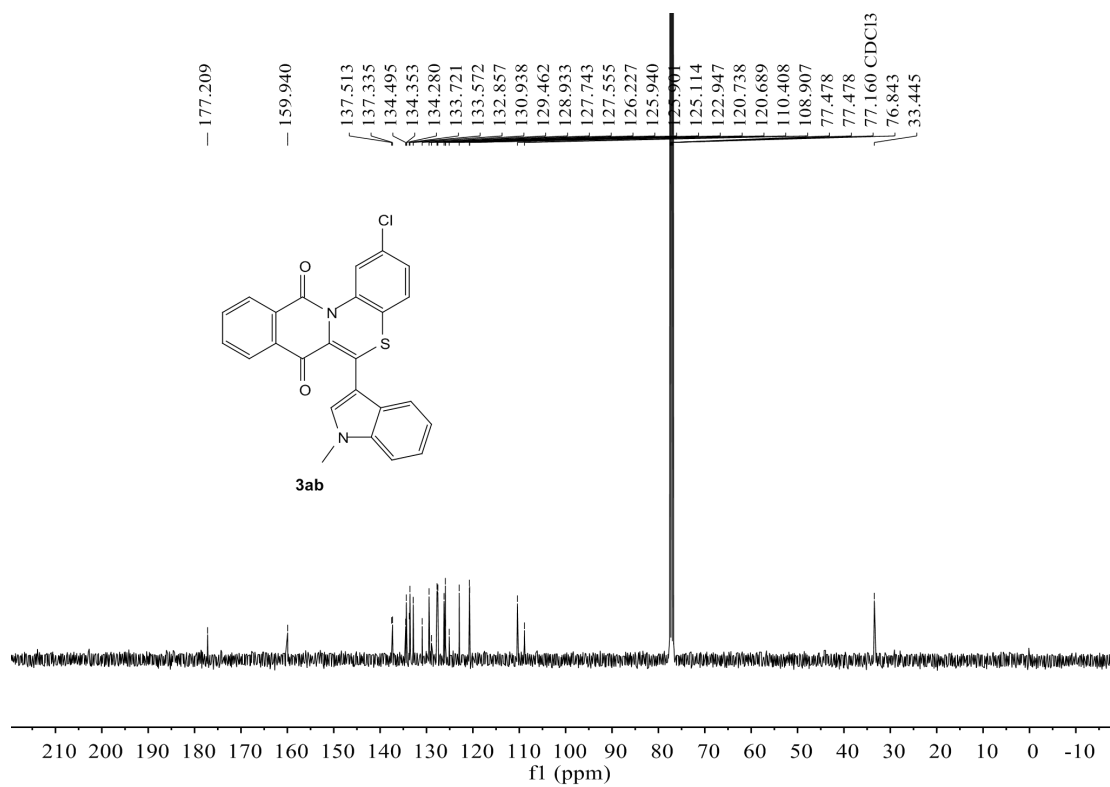



<sup>1</sup>H NMR (400 MHz) and <sup>13</sup>C NMR (100 MHz) spectra of **3ac** (CDCl<sub>3</sub>)

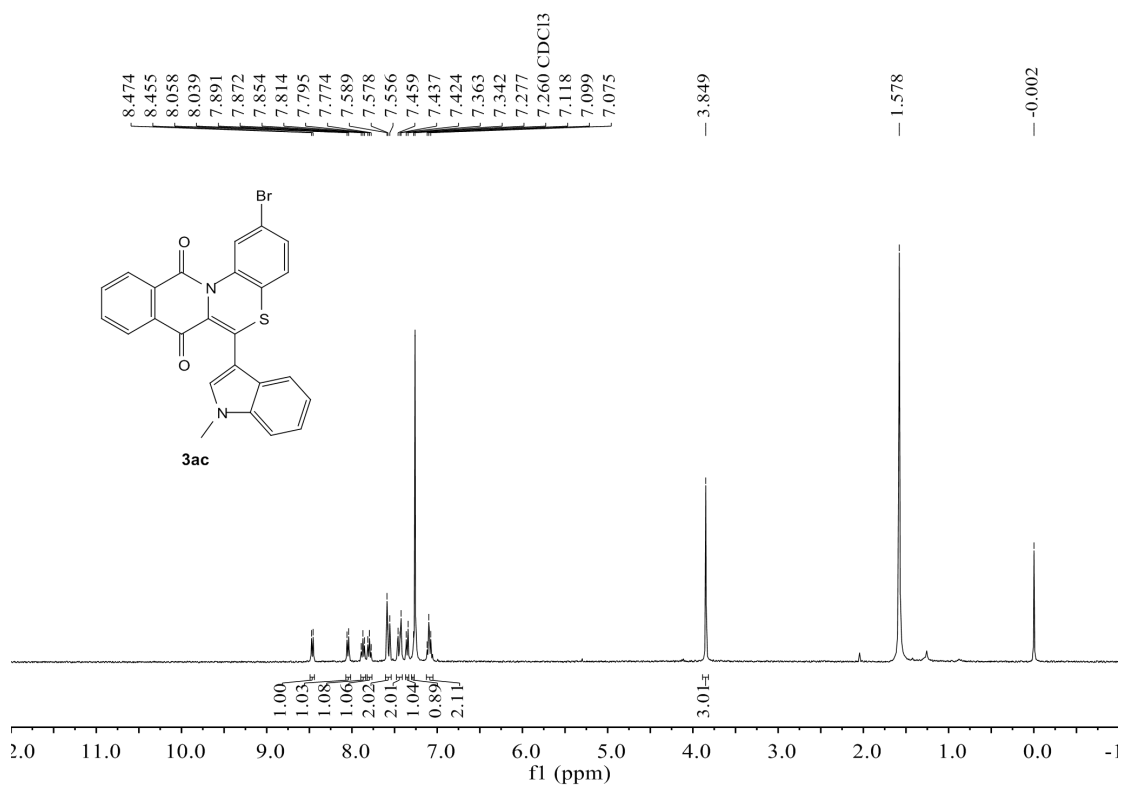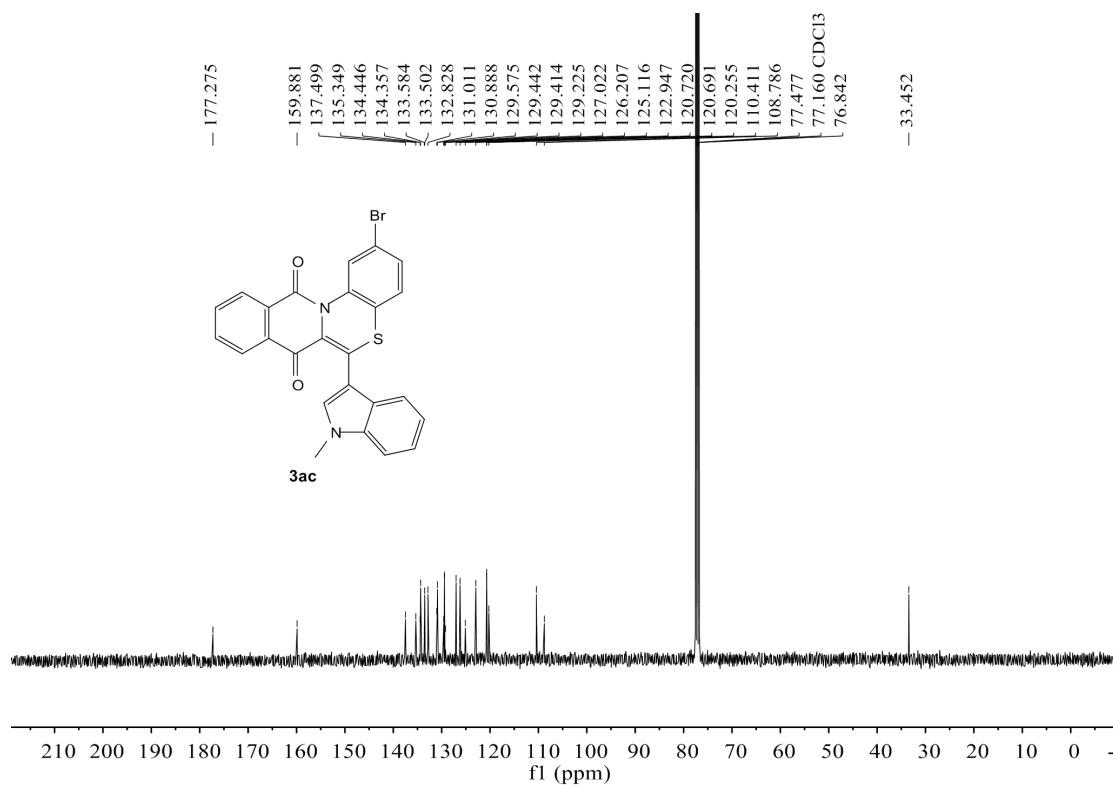

<sup>1</sup>H NMR (400 MHz) and <sup>13</sup>C NMR (100 MHz) spectra of **3ad** (CDCl<sub>3</sub>)

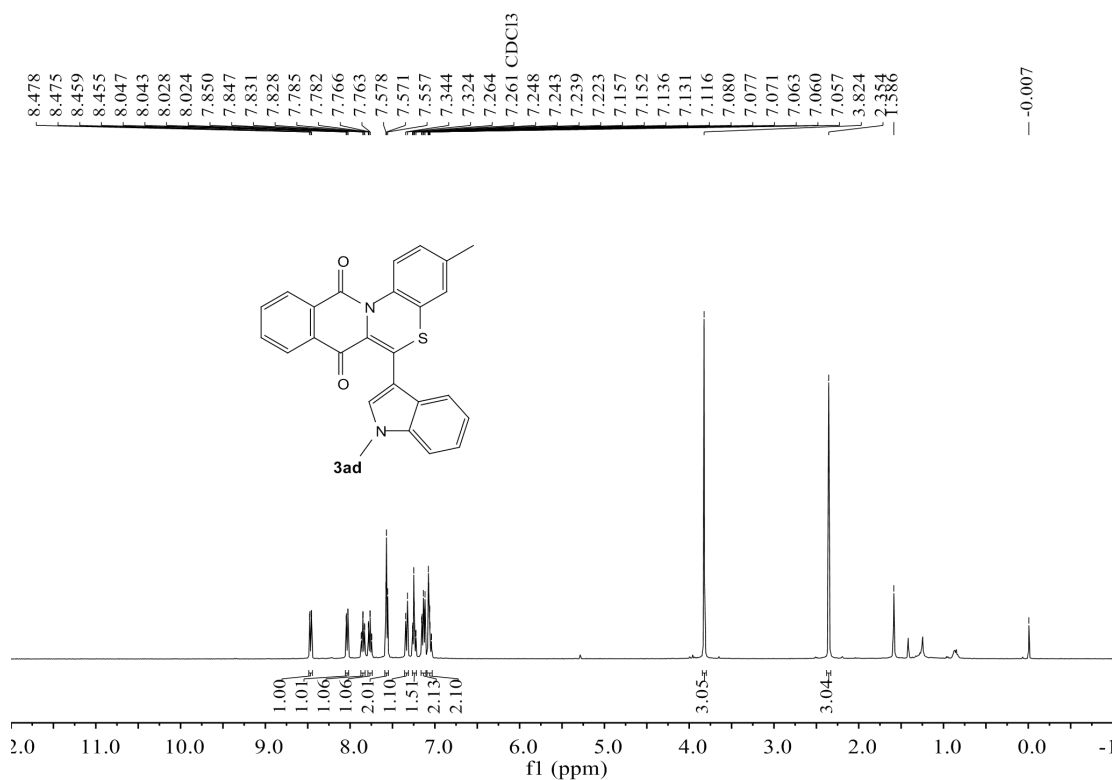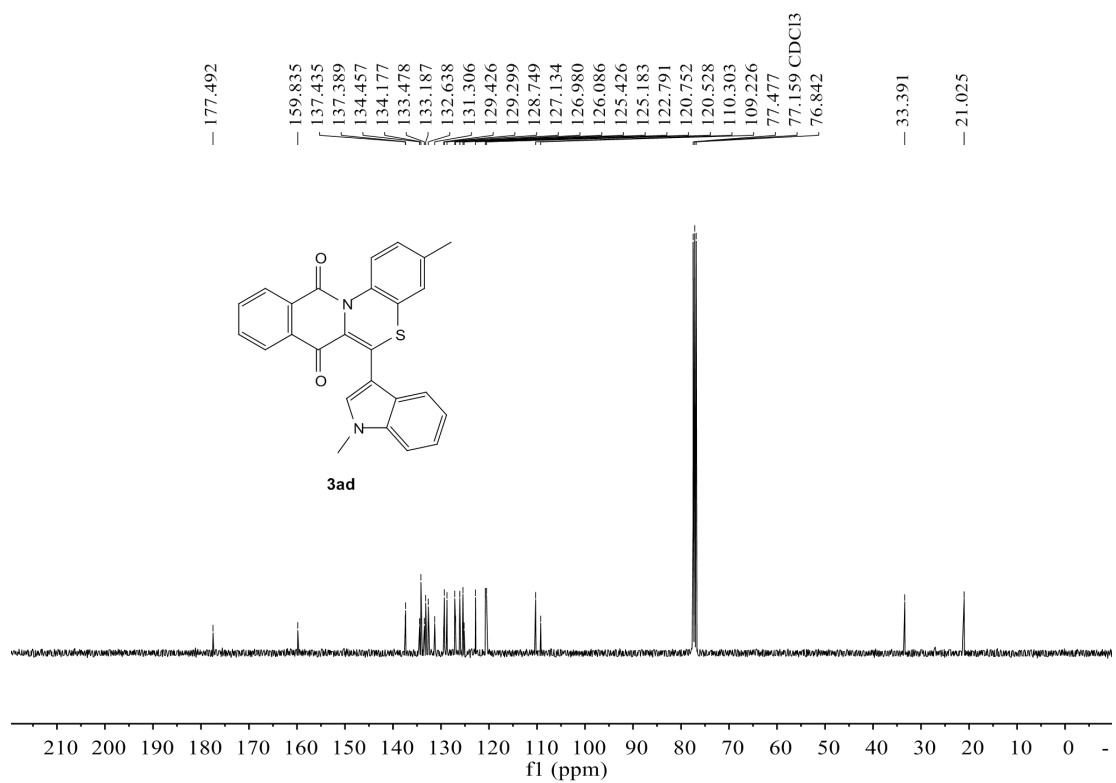

<sup>1</sup>H NMR (400 MHz) and <sup>13</sup>C NMR (100 MHz) spectra of **3ae** (CDCl<sub>3</sub>)

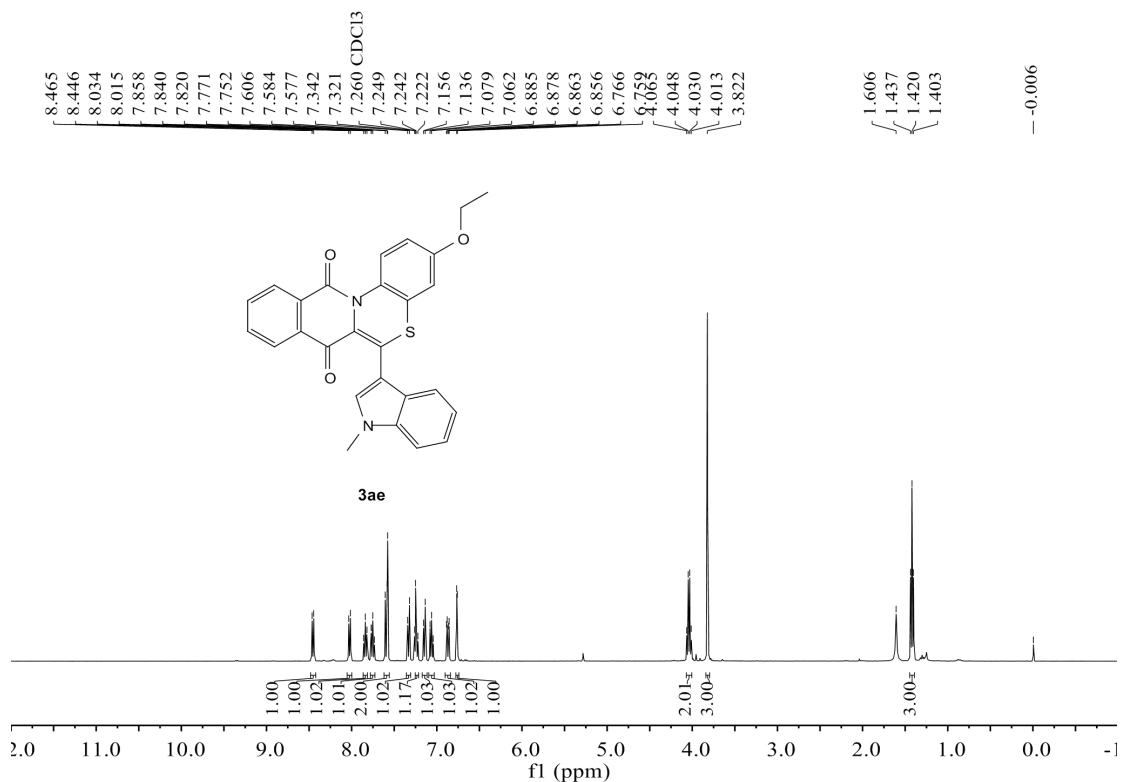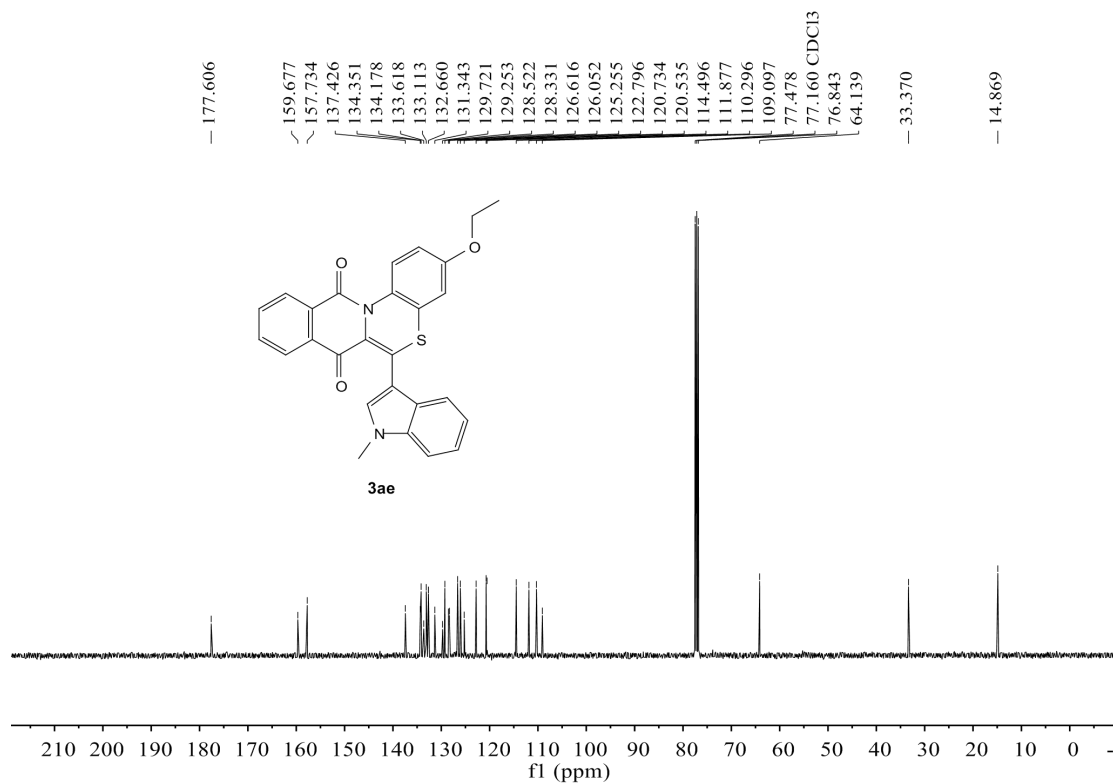

<sup>1</sup>H NMR (400 MHz) and <sup>13</sup>C NMR (100 MHz) spectra of **3af** (CDCl<sub>3</sub>)

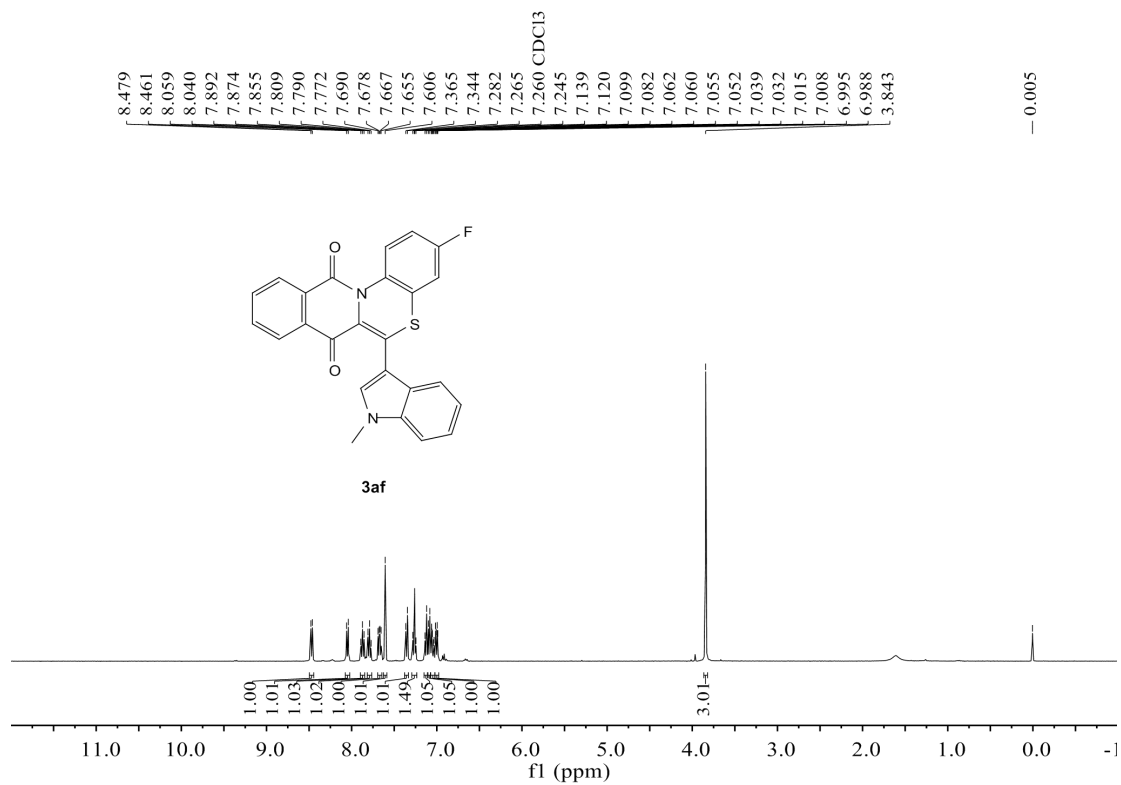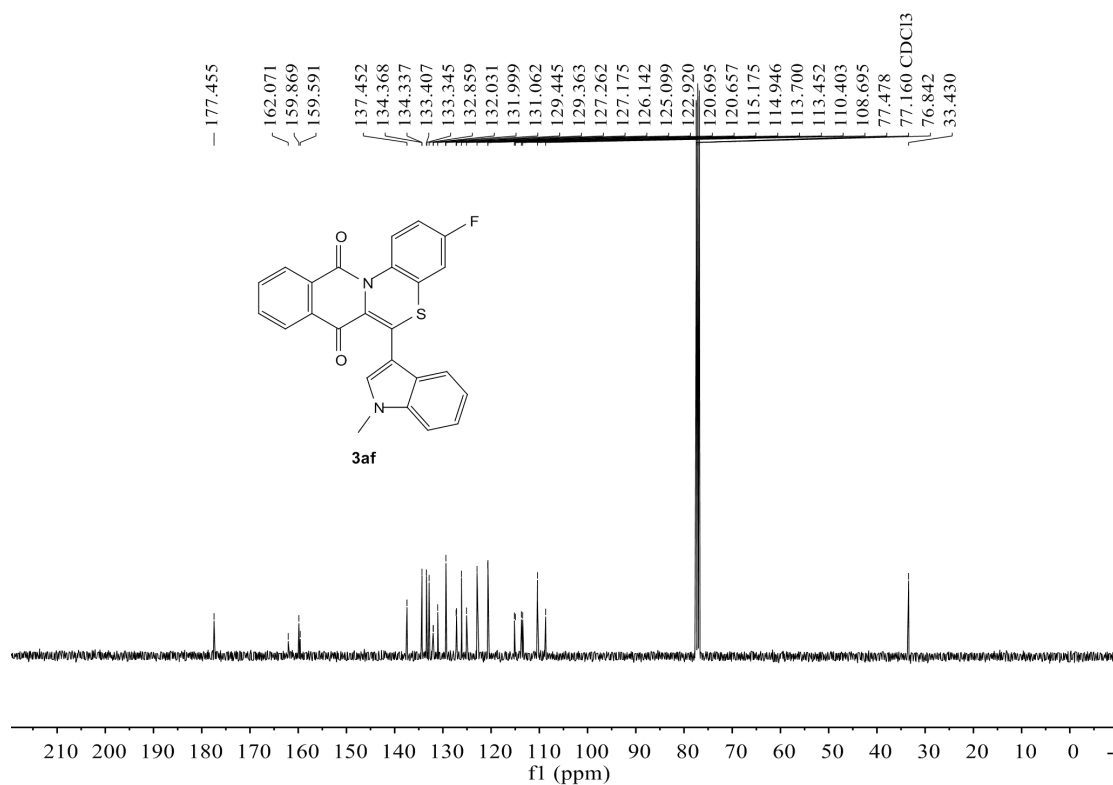

--114.080

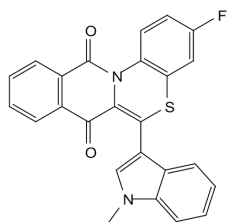

3af

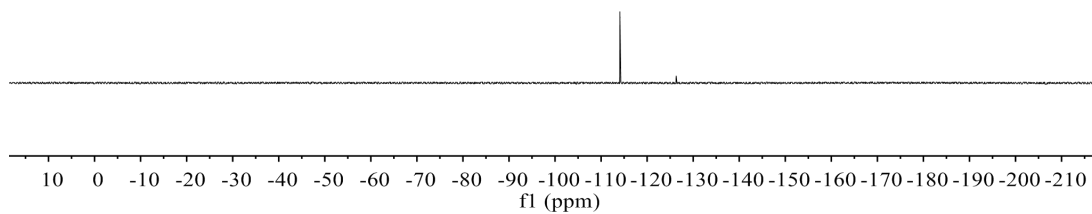

$^1\text{H}$  NMR (400 MHz) and  $^{13}\text{C}$  NMR (100 MHz) spectra of **3ag** ( $\text{CDCl}_3$ )

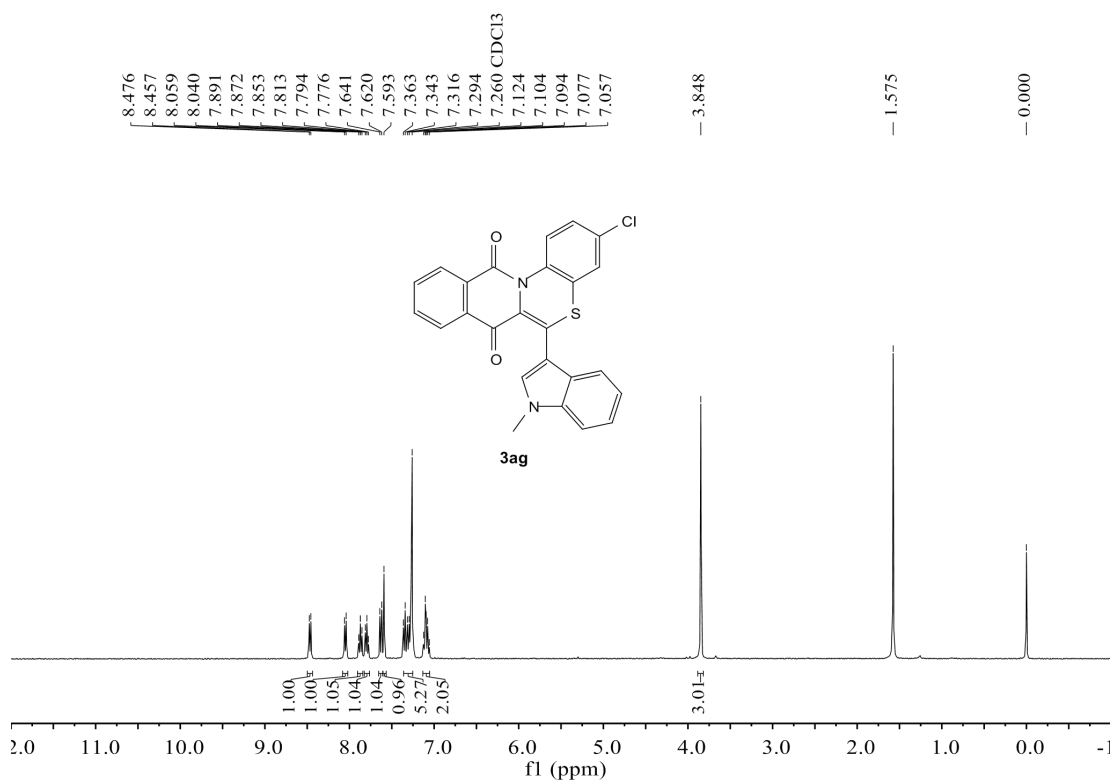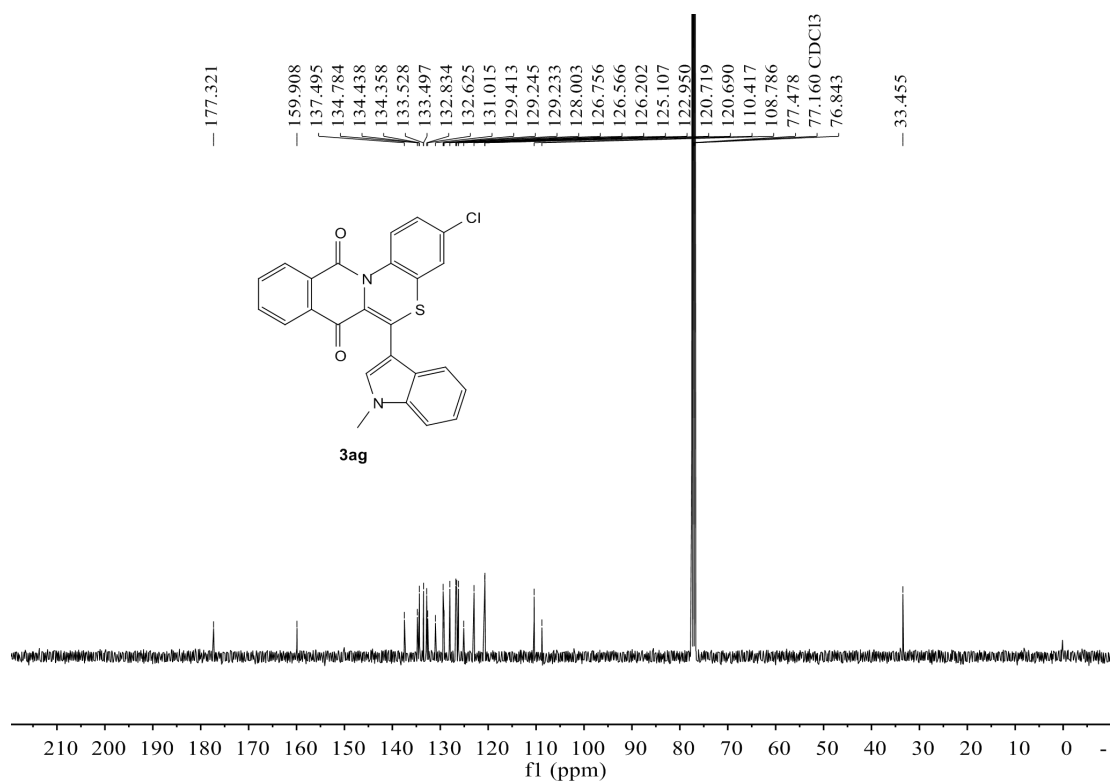

$^1\text{H}$  NMR (400 MHz) and  $^{13}\text{C}$  NMR (100 MHz) spectra of **3ah** ( $\text{CDCl}_3$ )

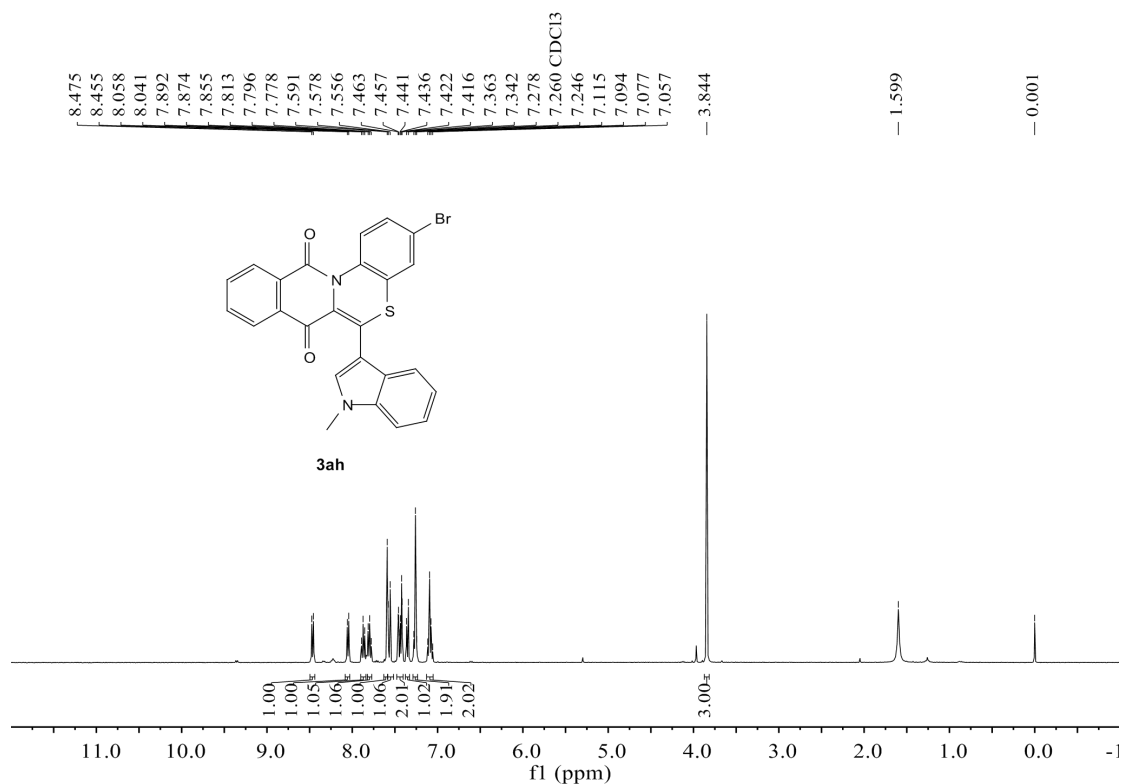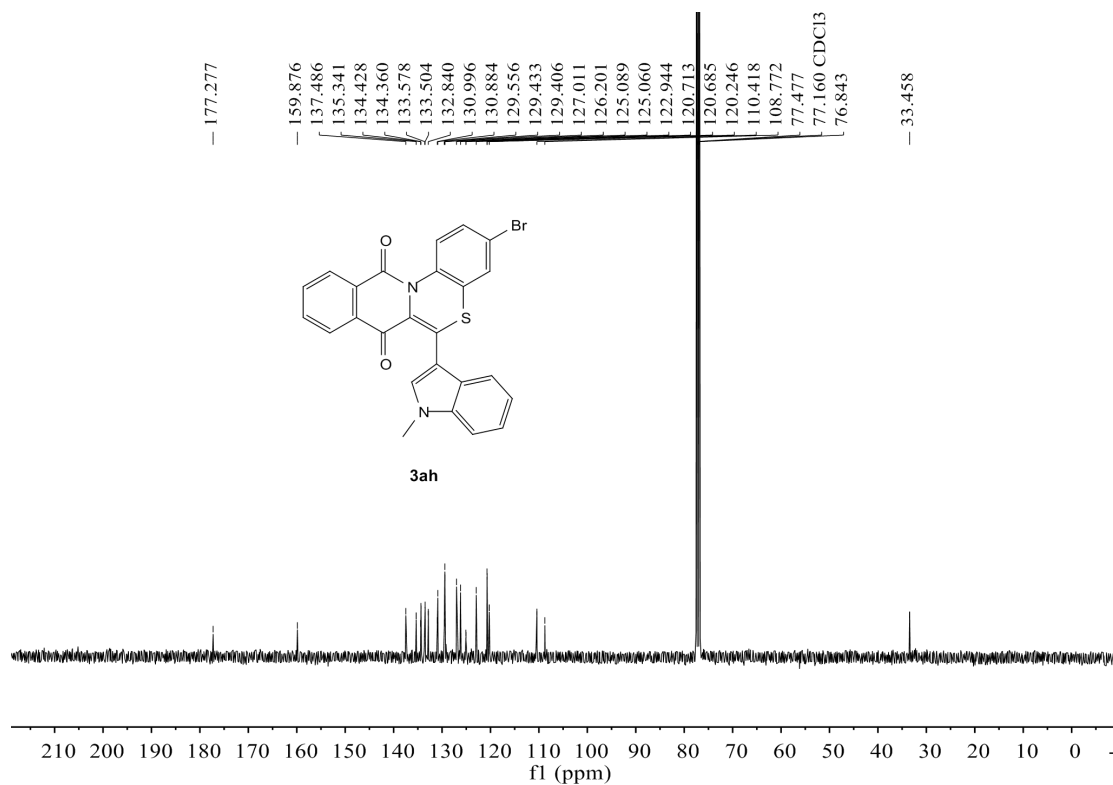

$^1\text{H}$  NMR (400 MHz) and  $^{13}\text{C}$  NMR (100 MHz) spectra of **3ba** ( $\text{CDCl}_3$ )

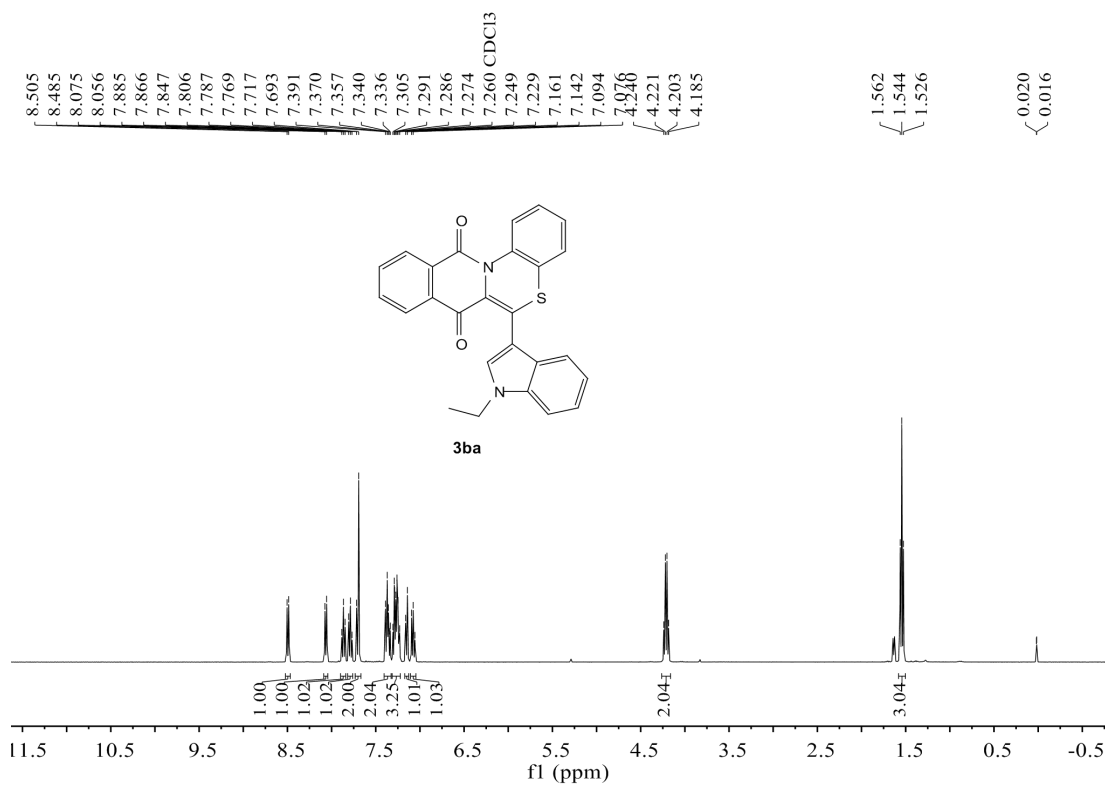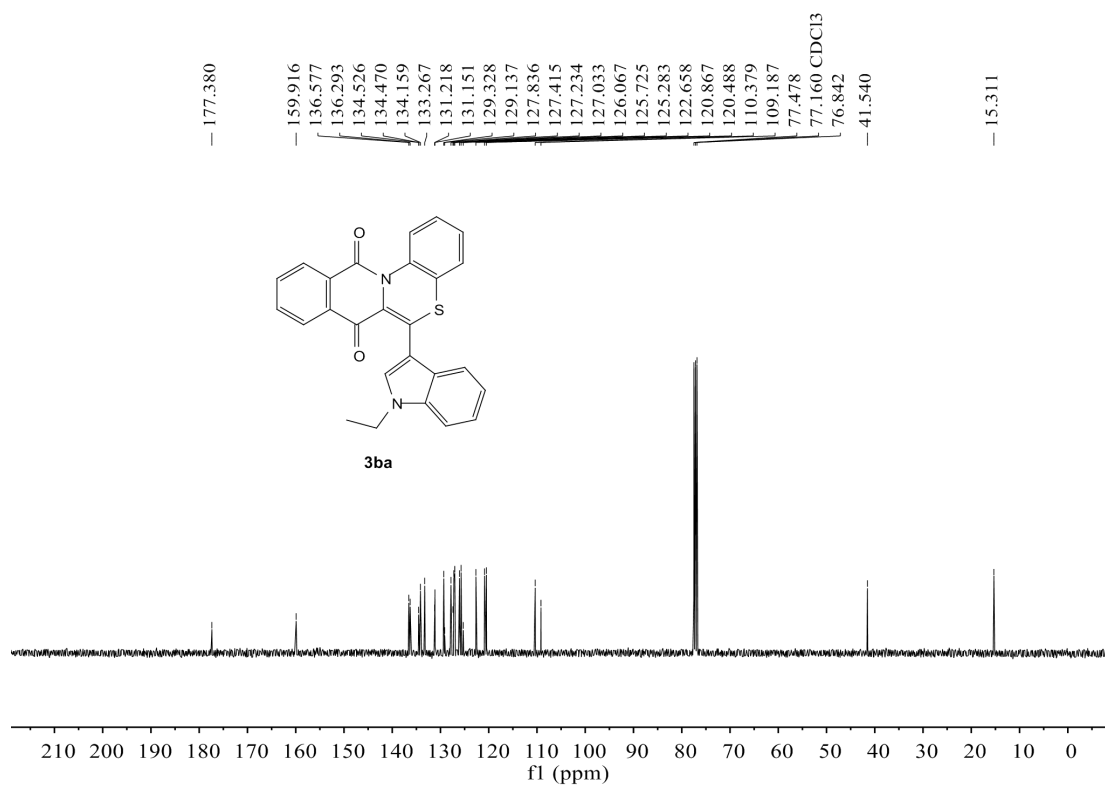



<sup>1</sup>H NMR (400 MHz) and <sup>13</sup>C NMR (100 MHz) spectra of **3ca** (CDCl<sub>3</sub>)

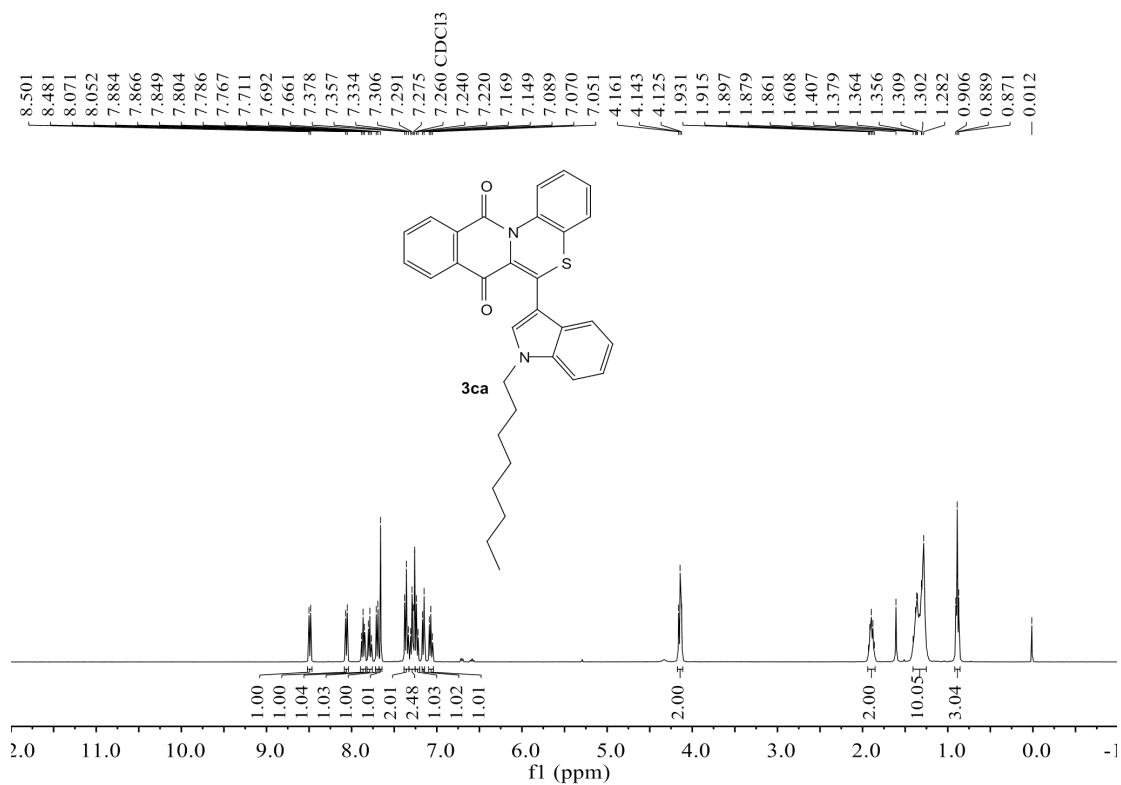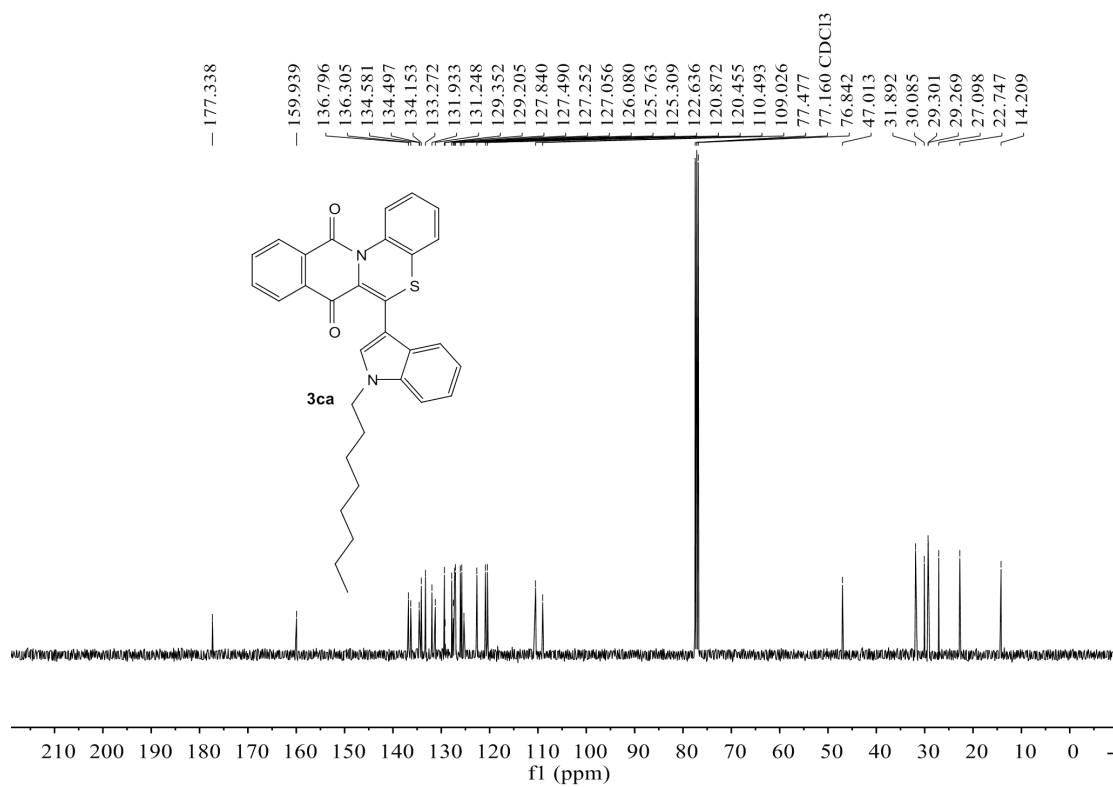

$^1\text{H}$  NMR (400 MHz) and  $^{13}\text{C}$  NMR (100 MHz) spectra of **3ea** ( $\text{CDCl}_3$ )

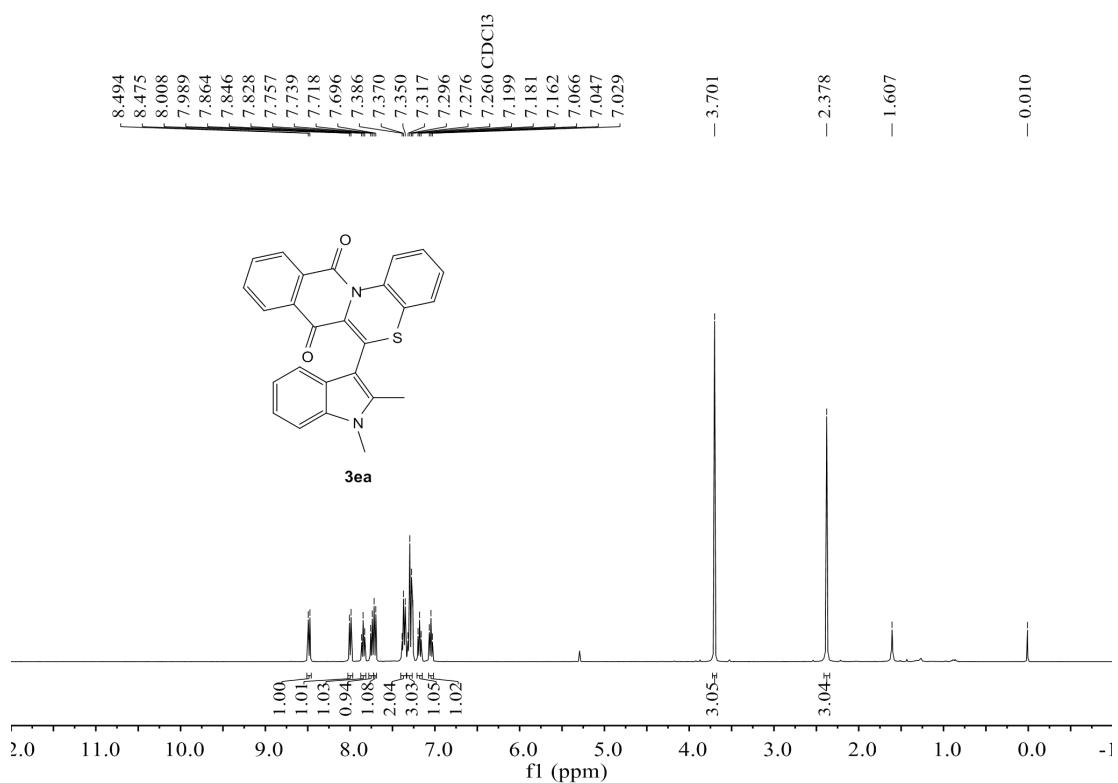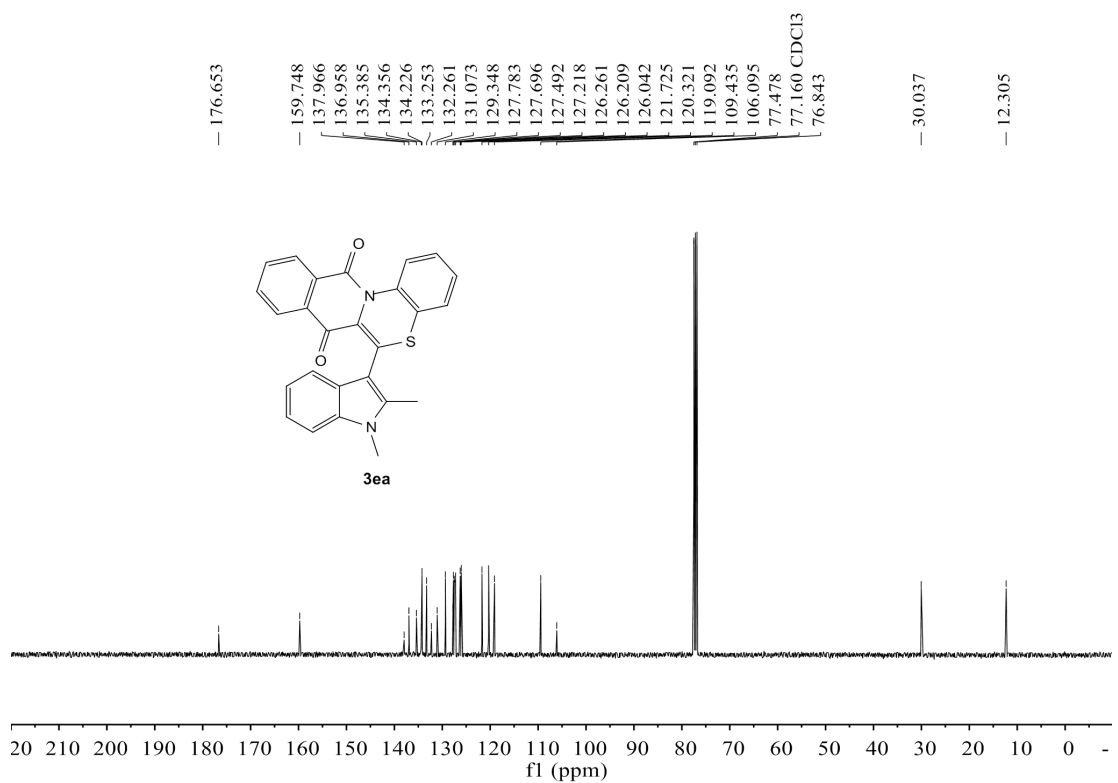

$^1\text{H}$  NMR (400 MHz) and  $^{13}\text{C}$  NMR (100 MHz) spectra of **3fa** ( $\text{CDCl}_3$ )

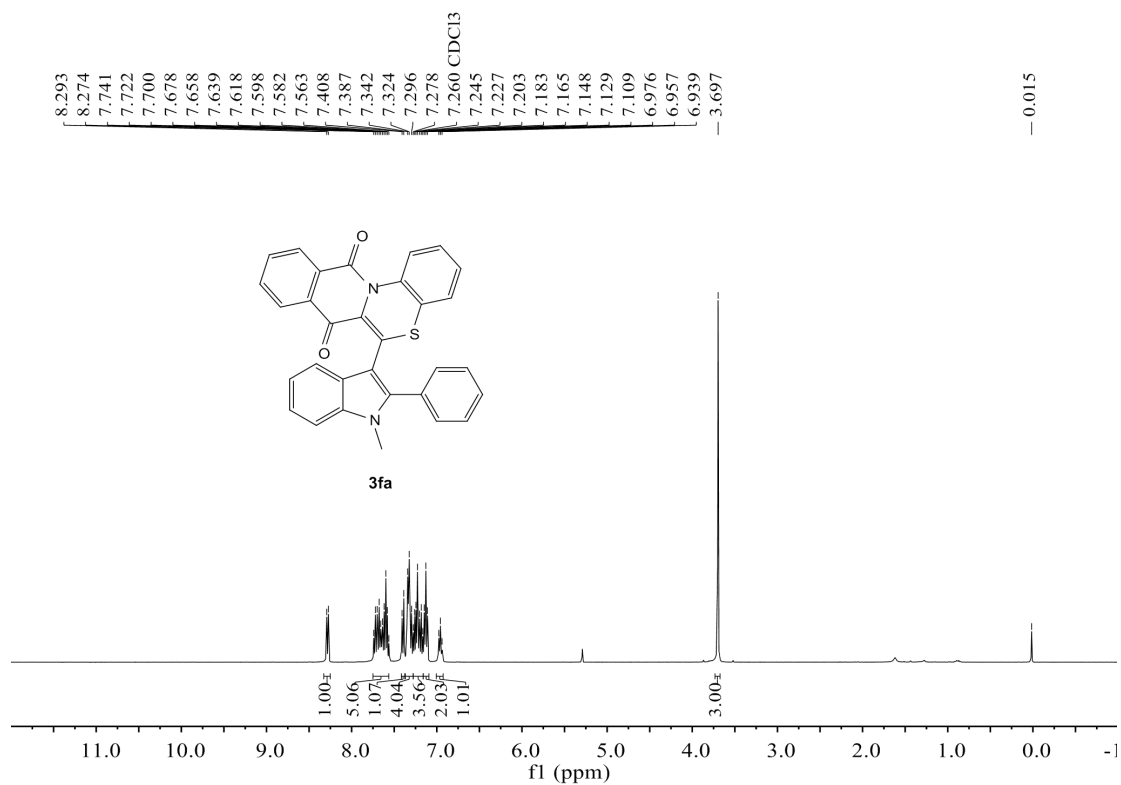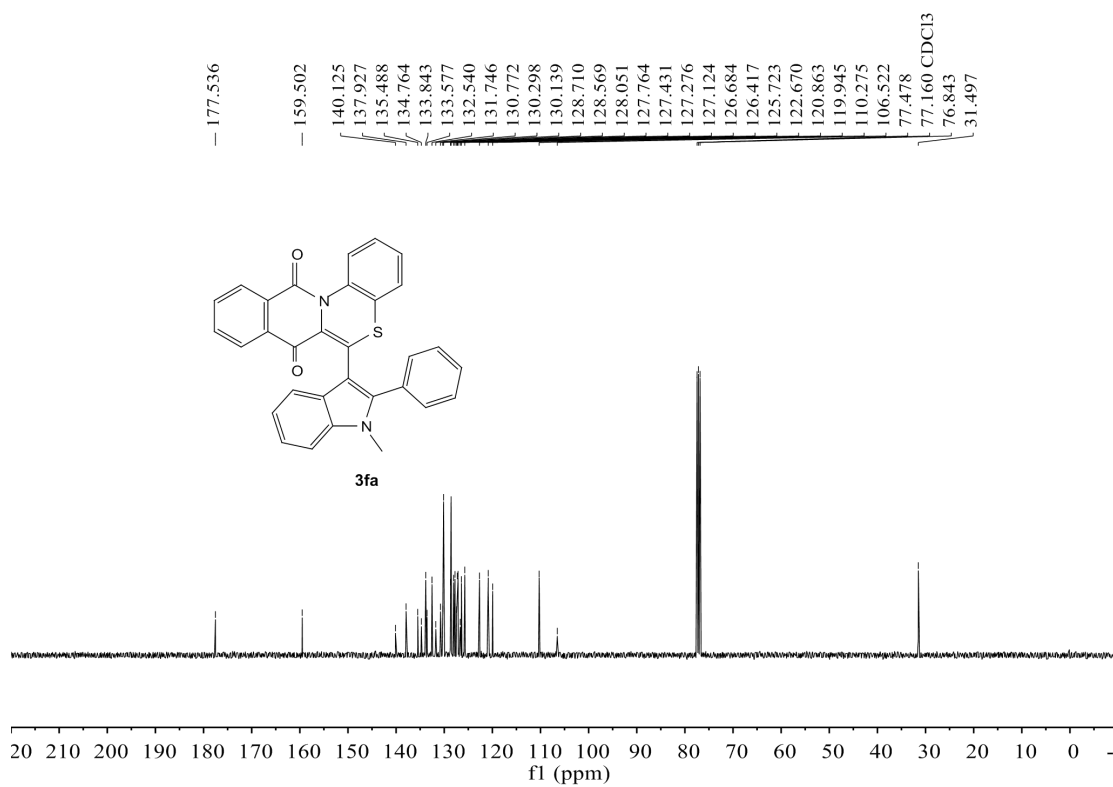

$^1\text{H}$  NMR (400 MHz) and  $^{13}\text{C}$  NMR (100 MHz) spectra of **3ga** ( $\text{CDCl}_3$ )

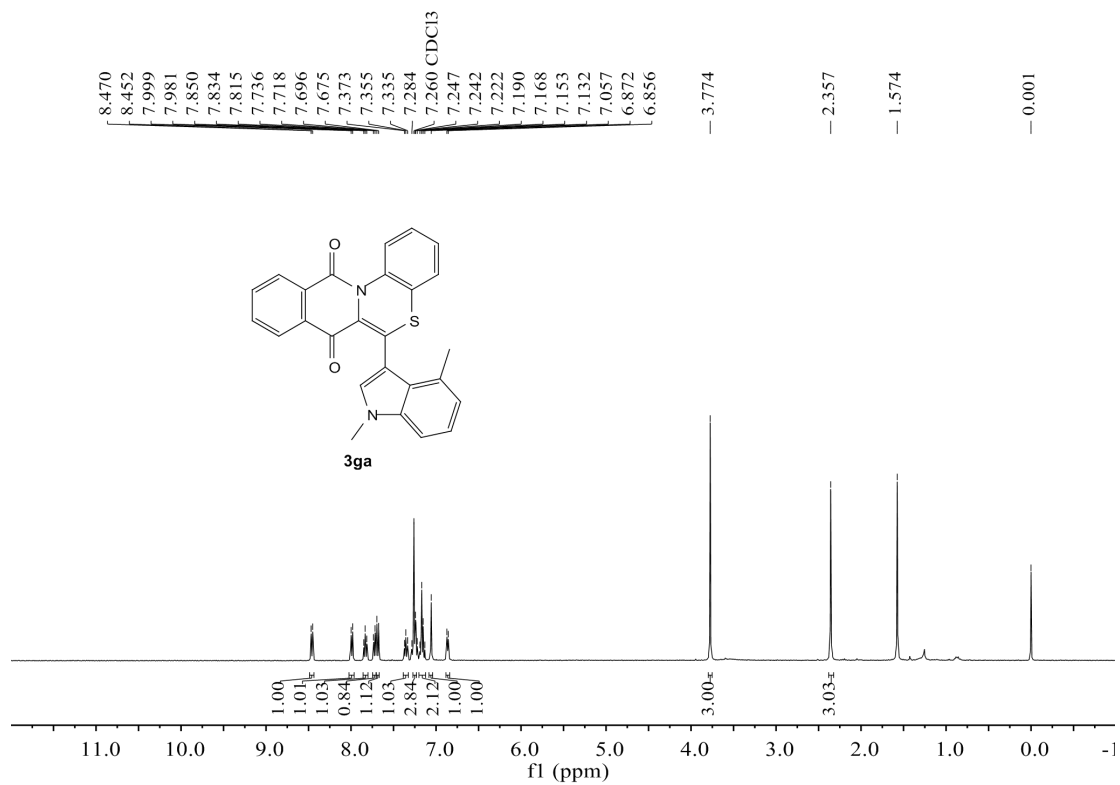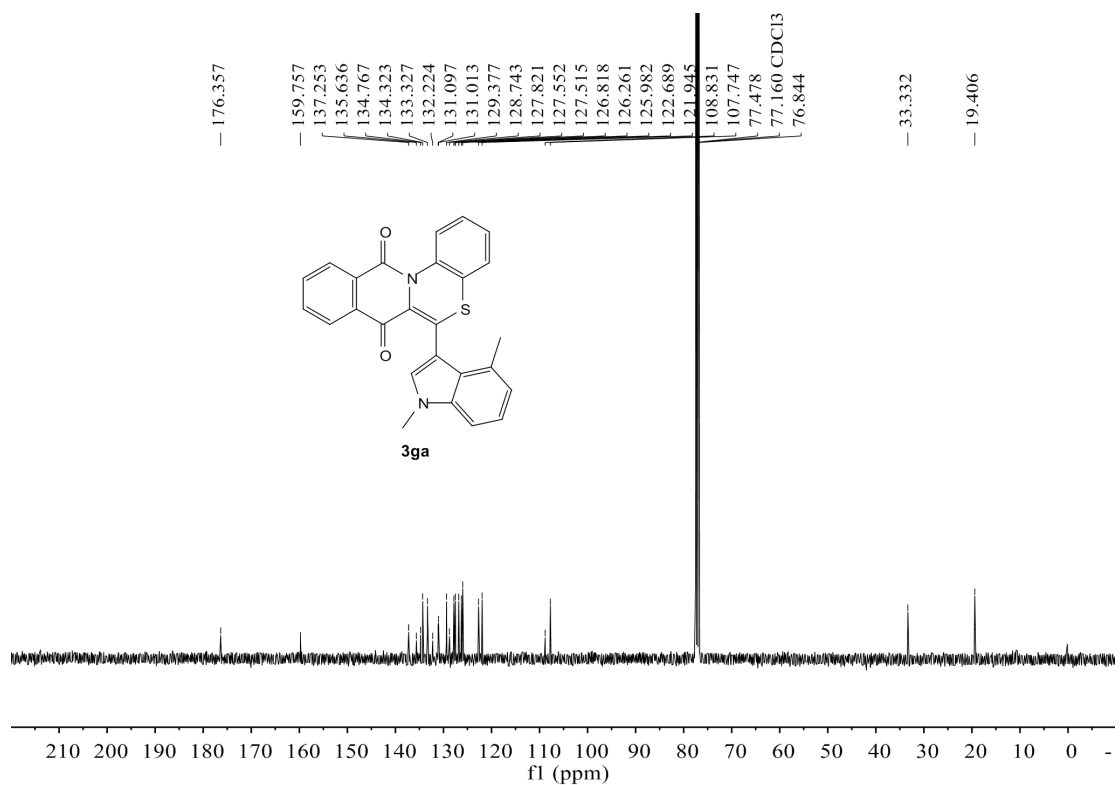

<sup>1</sup>H NMR (400 MHz) and <sup>13</sup>C NMR (100 MHz) spectra of **3ha** (CDCl<sub>3</sub>)

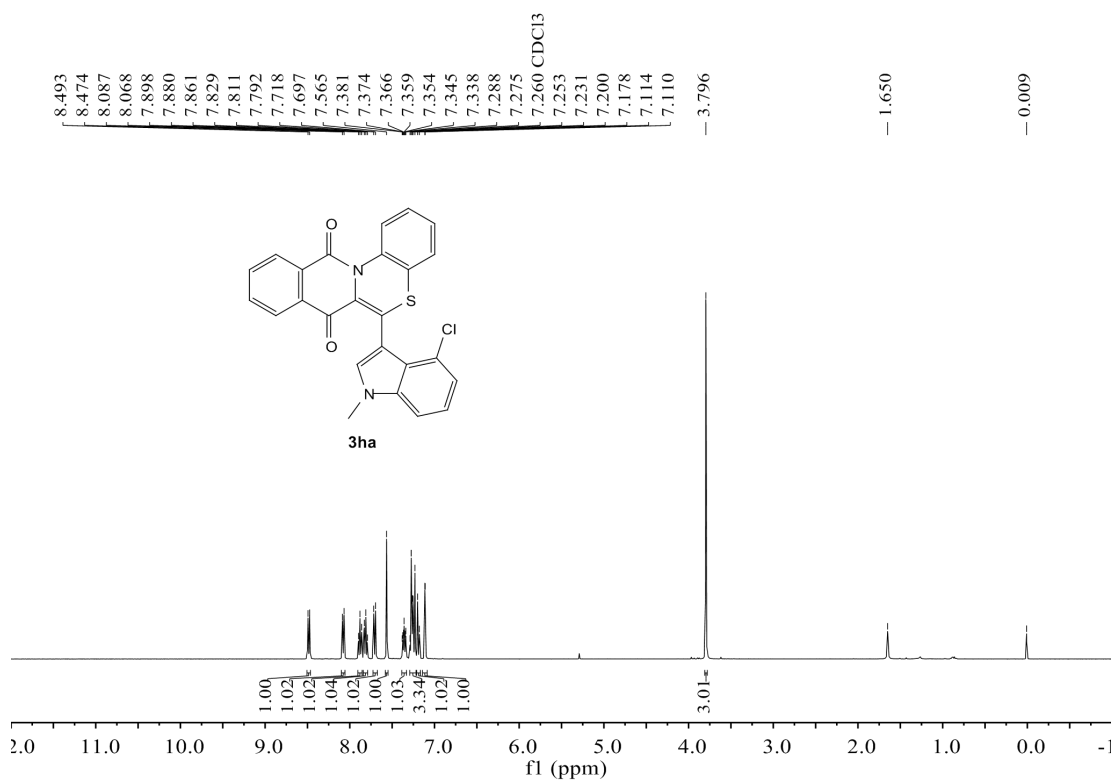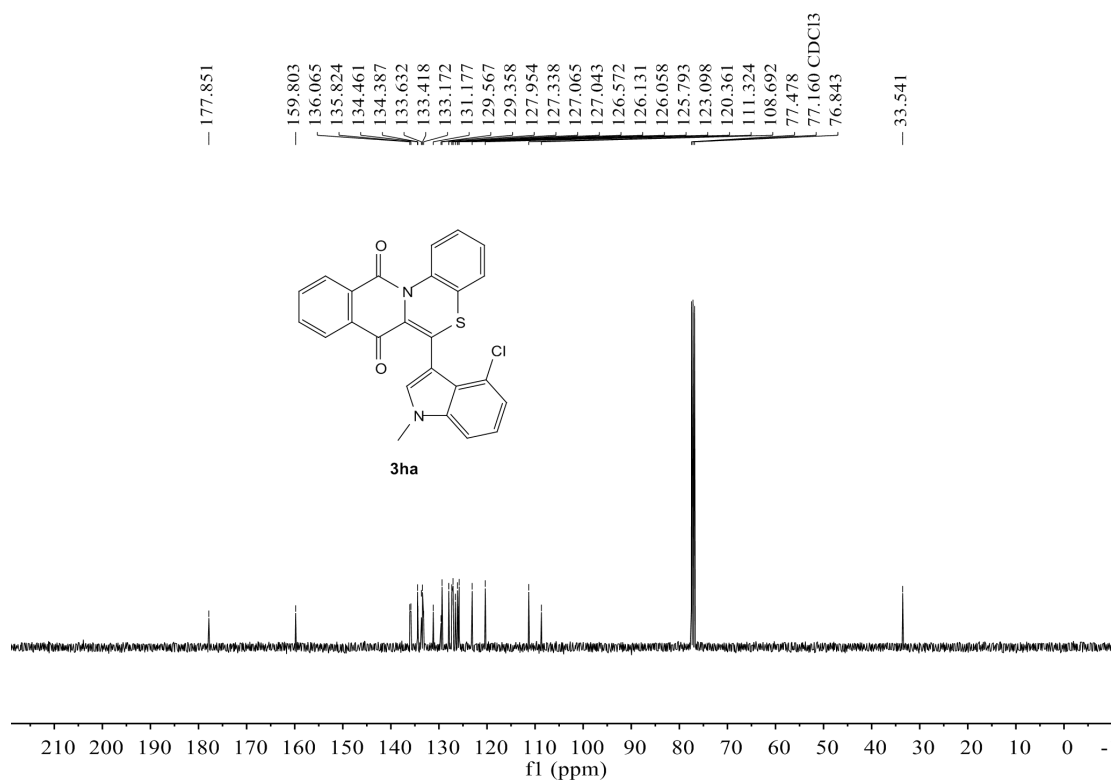

<sup>1</sup>H NMR (400 MHz) and <sup>13</sup>C NMR (100 MHz) spectra of **3ia** (CDCl<sub>3</sub>)

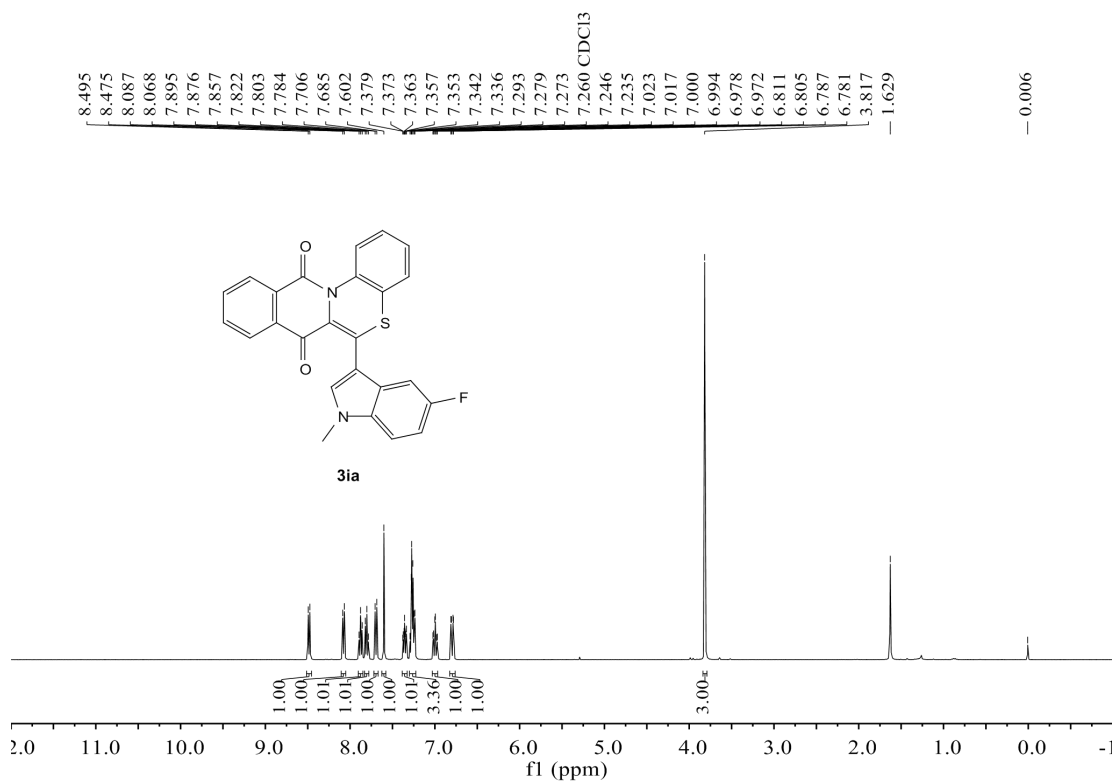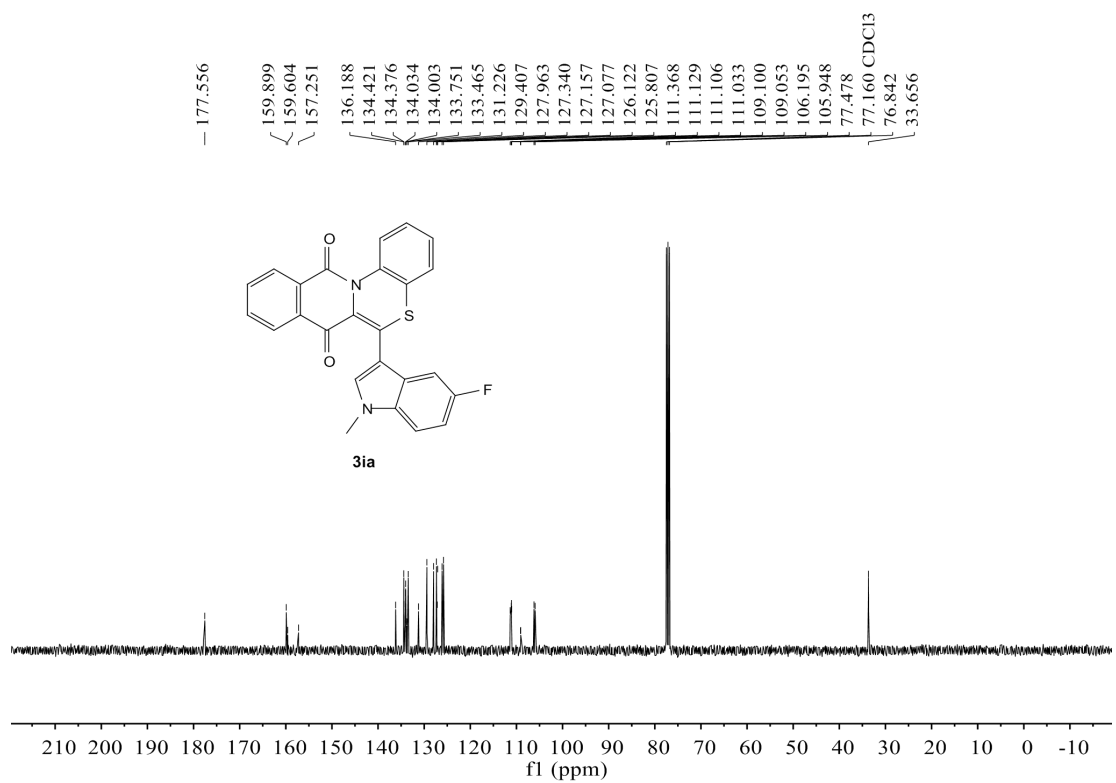

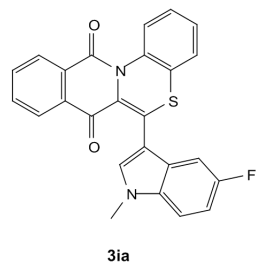

-122.9147

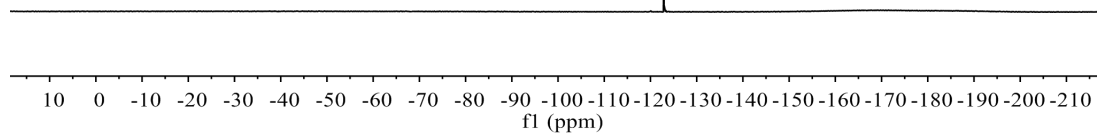

<sup>1</sup>H NMR (400 MHz) and <sup>13</sup>C NMR (100 MHz) spectra of **3ja** (CDCl<sub>3</sub>)

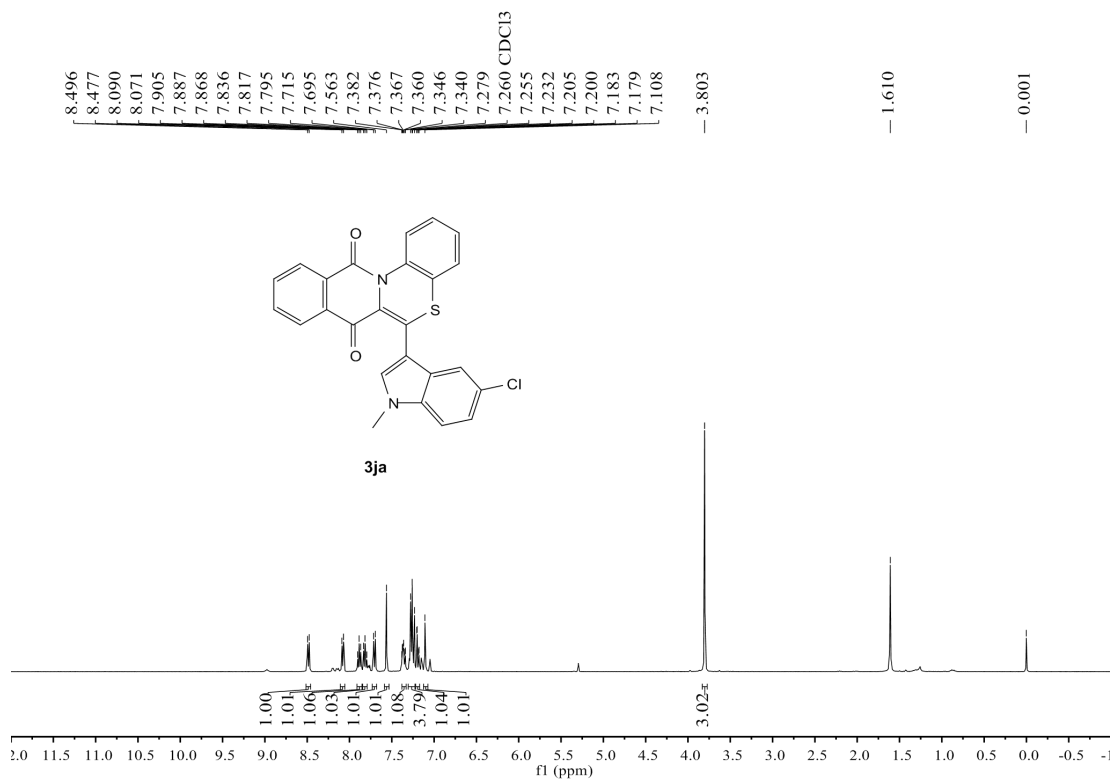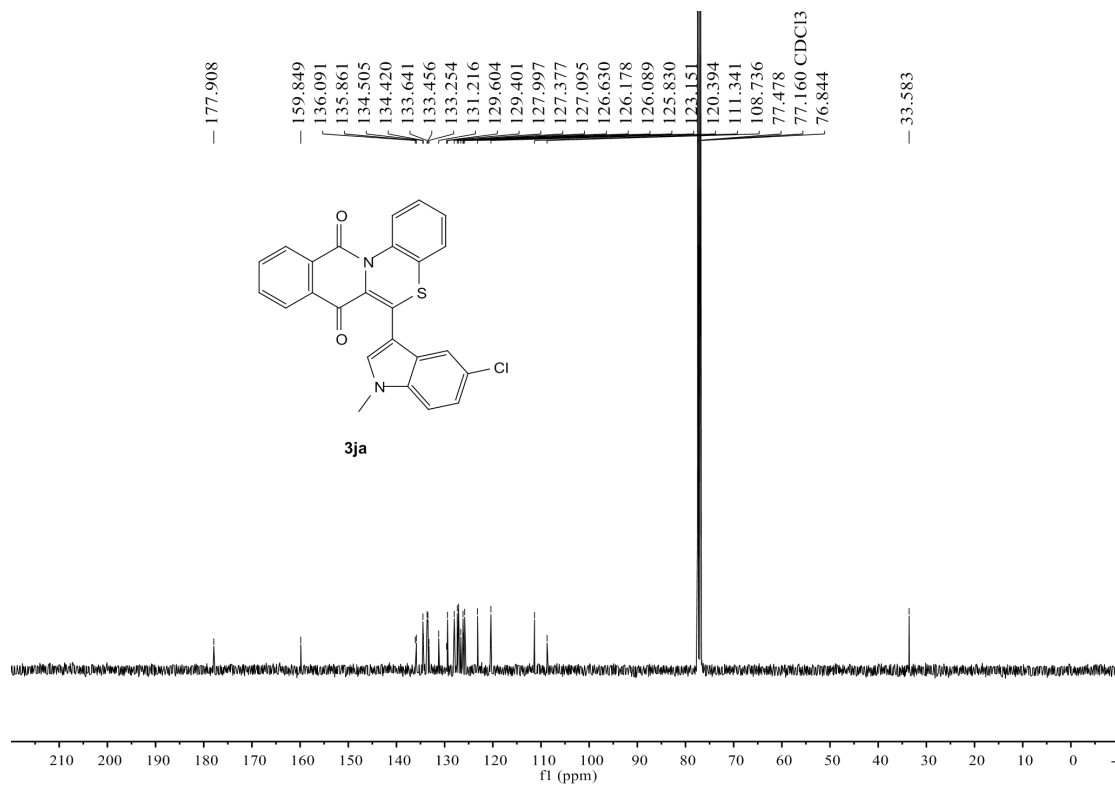



<sup>1</sup>H NMR (400 MHz) and <sup>13</sup>C NMR (100 MHz) spectra of **3ka** (CDCl<sub>3</sub>)

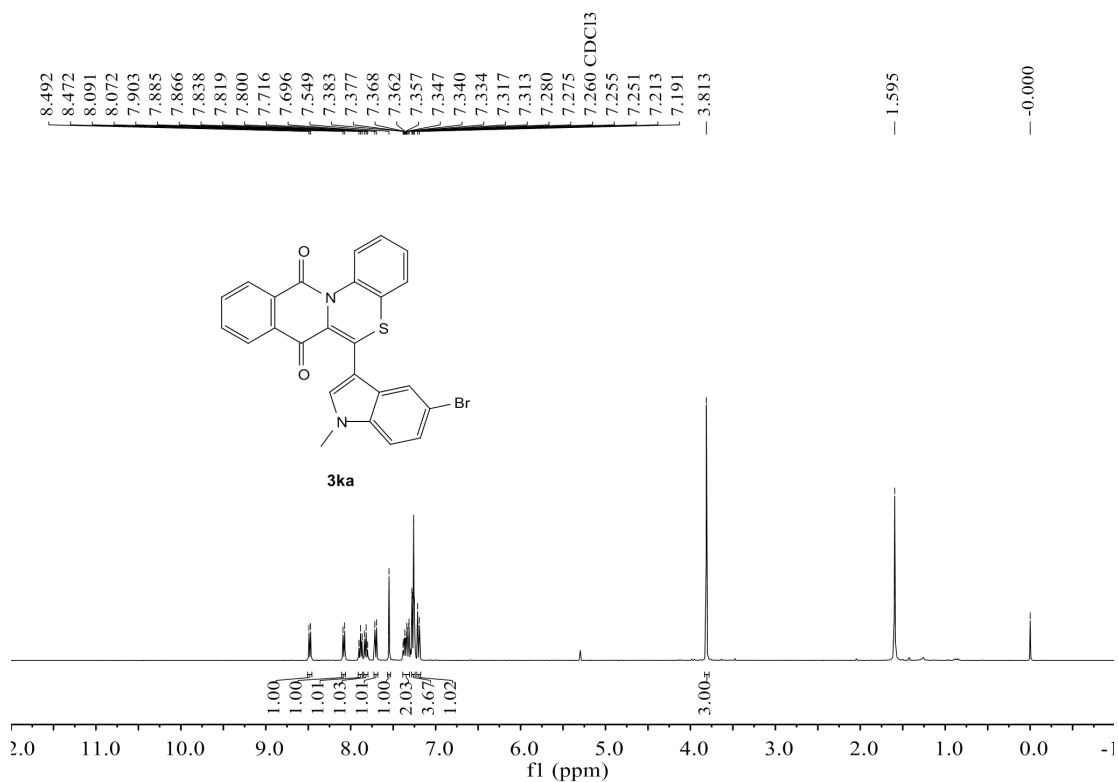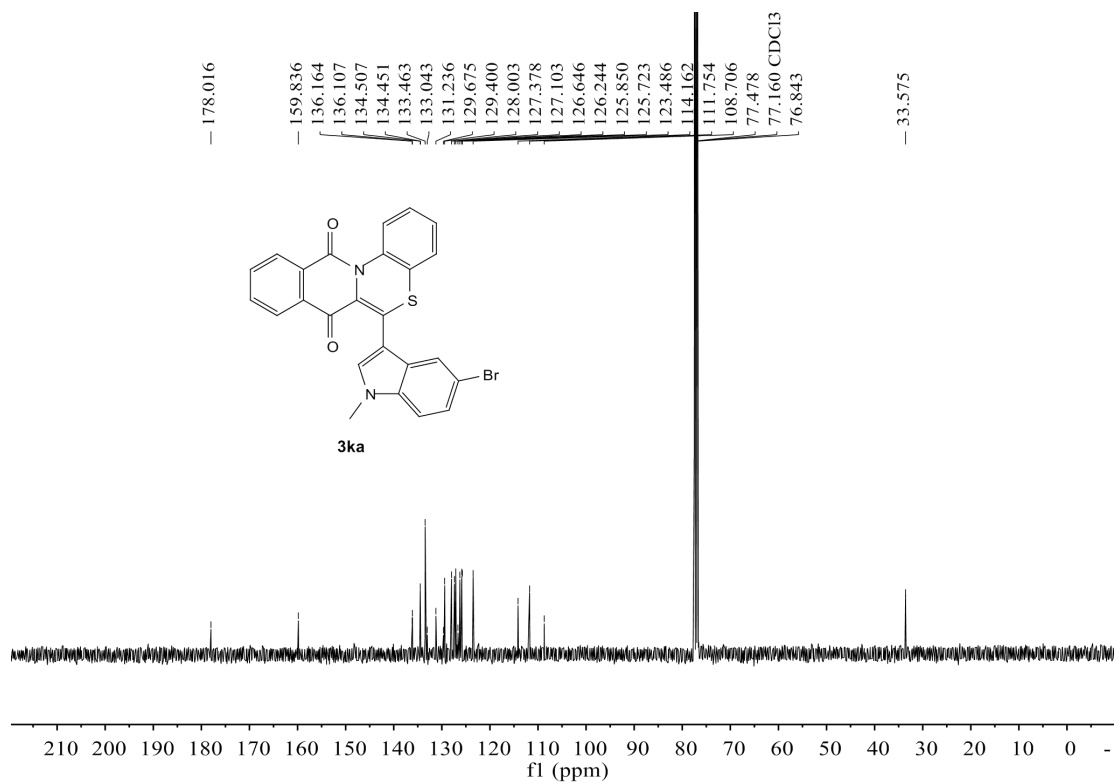

<sup>1</sup>H NMR (400 MHz) and <sup>13</sup>C NMR (100 MHz) spectra of **3la** (CDCl<sub>3</sub>)

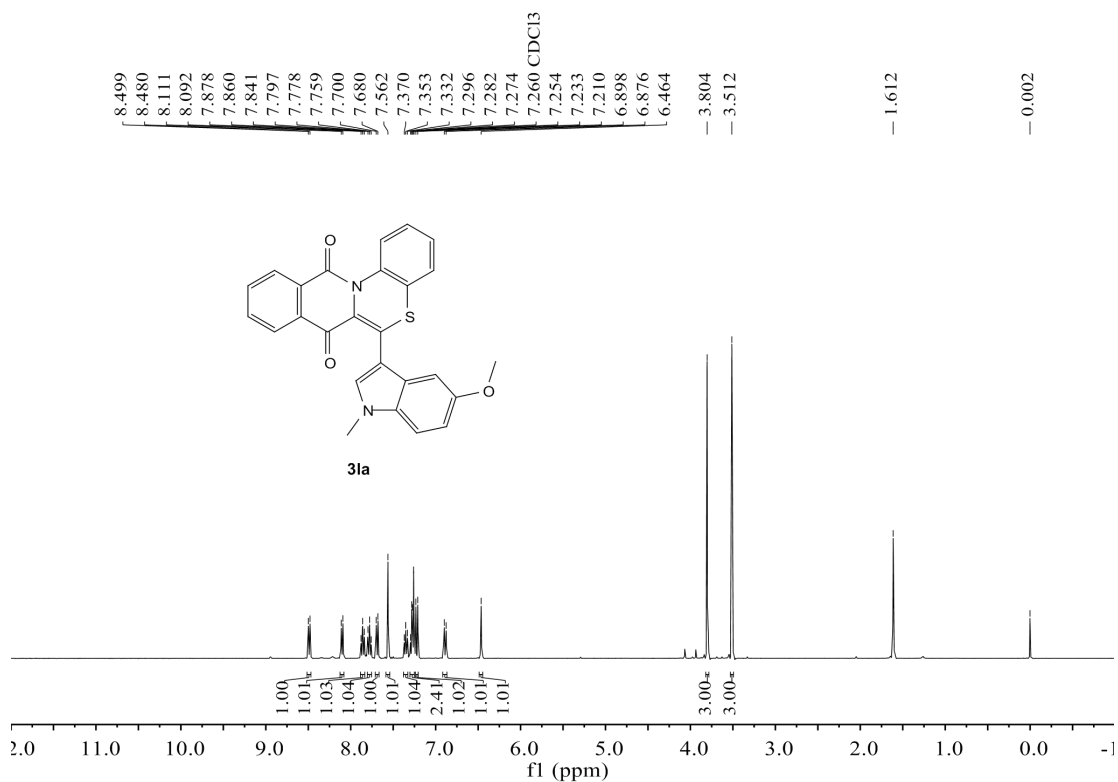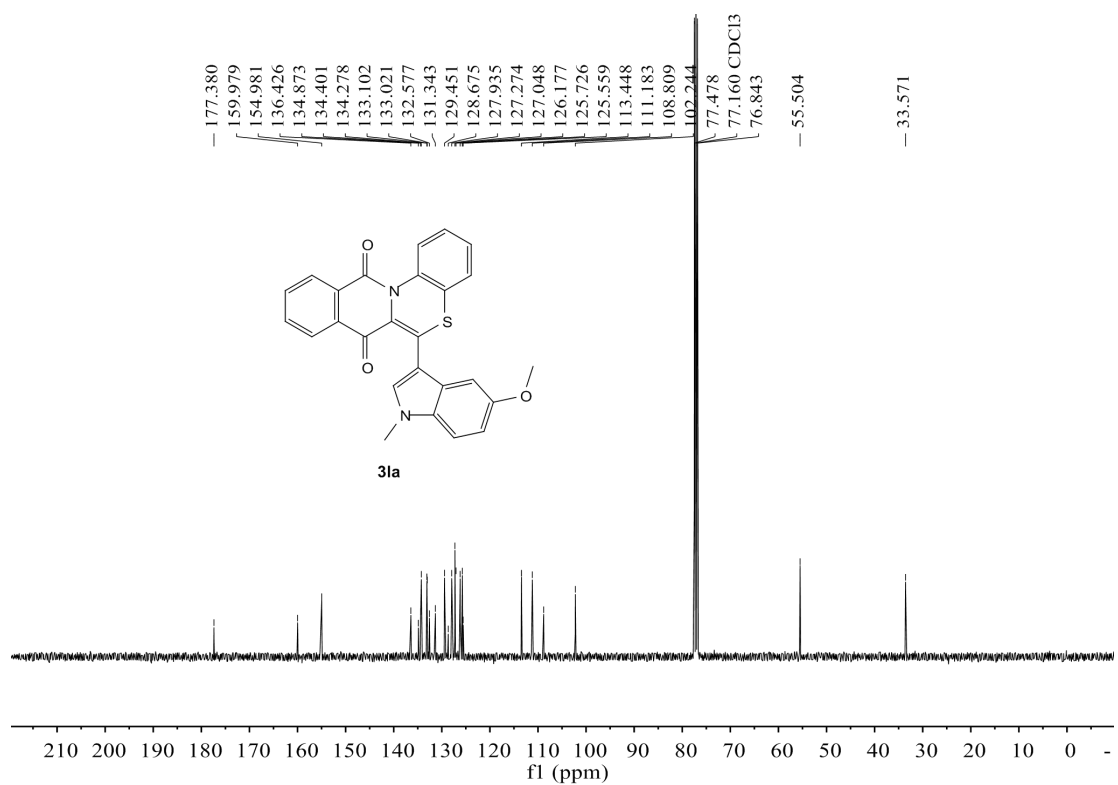

$^1\text{H}$  NMR (400 MHz) and  $^{13}\text{C}$  NMR (100 MHz) spectra of **3ma** ( $\text{CDCl}_3$ )

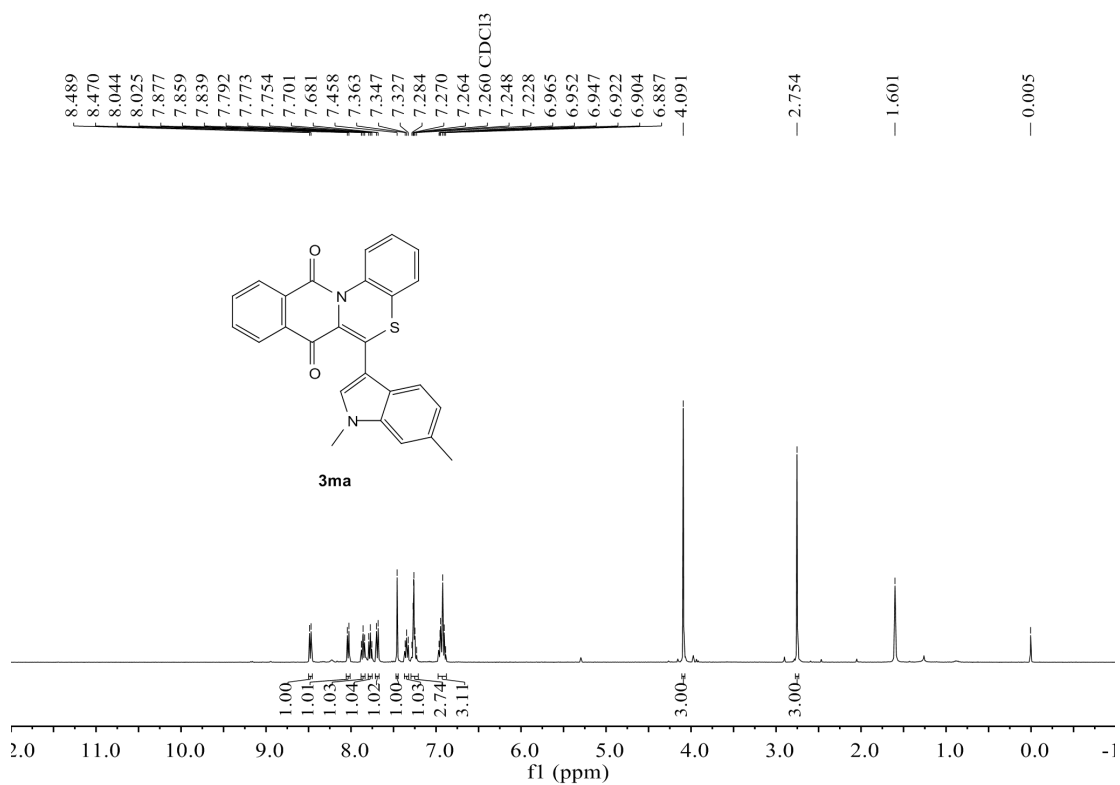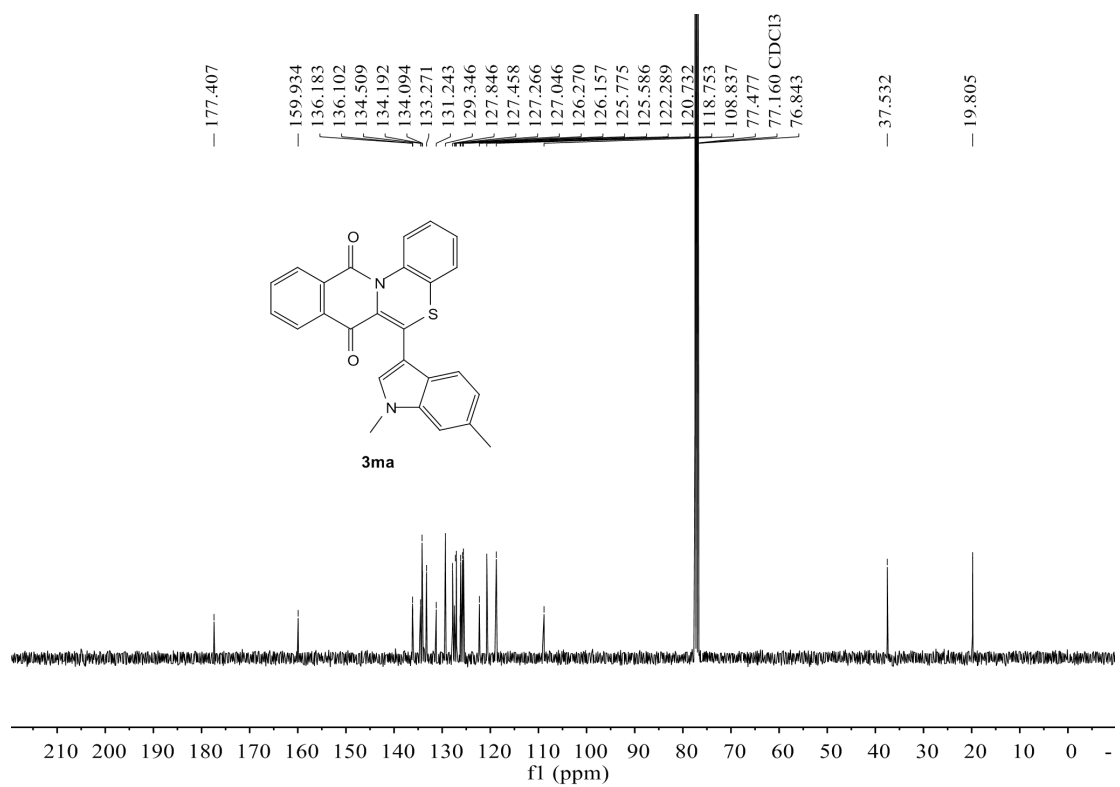

<sup>1</sup>H NMR (400 MHz) and <sup>13</sup>C NMR (100 MHz) spectra of **3na** (CDCl<sub>3</sub>)

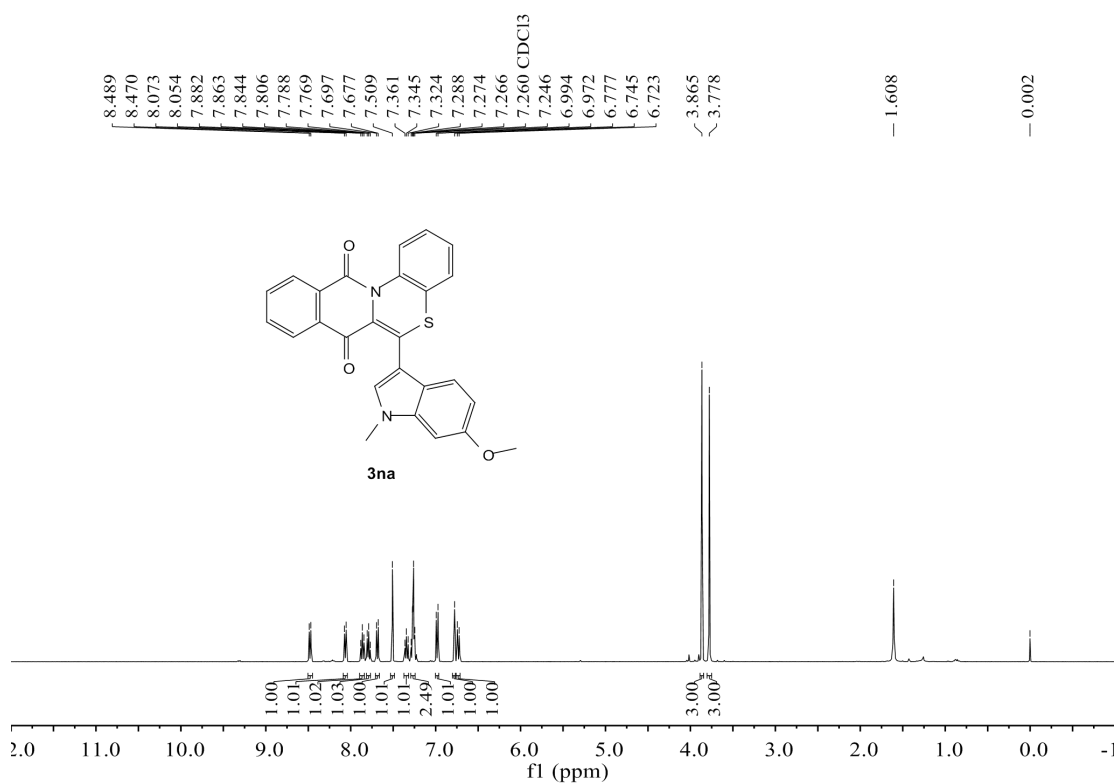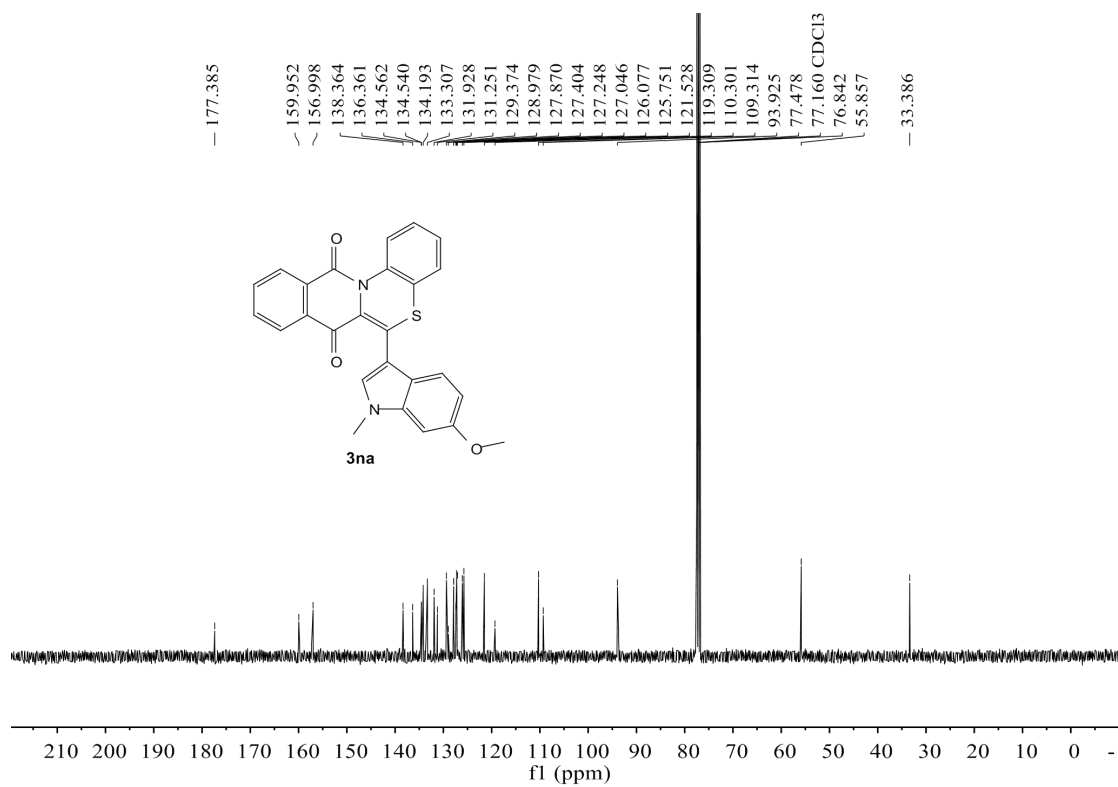

$^1\text{H}$  NMR (400 MHz) and  $^{13}\text{C}$  NMR (100 MHz) spectra of **3pa** ( $\text{CDCl}_3$ )

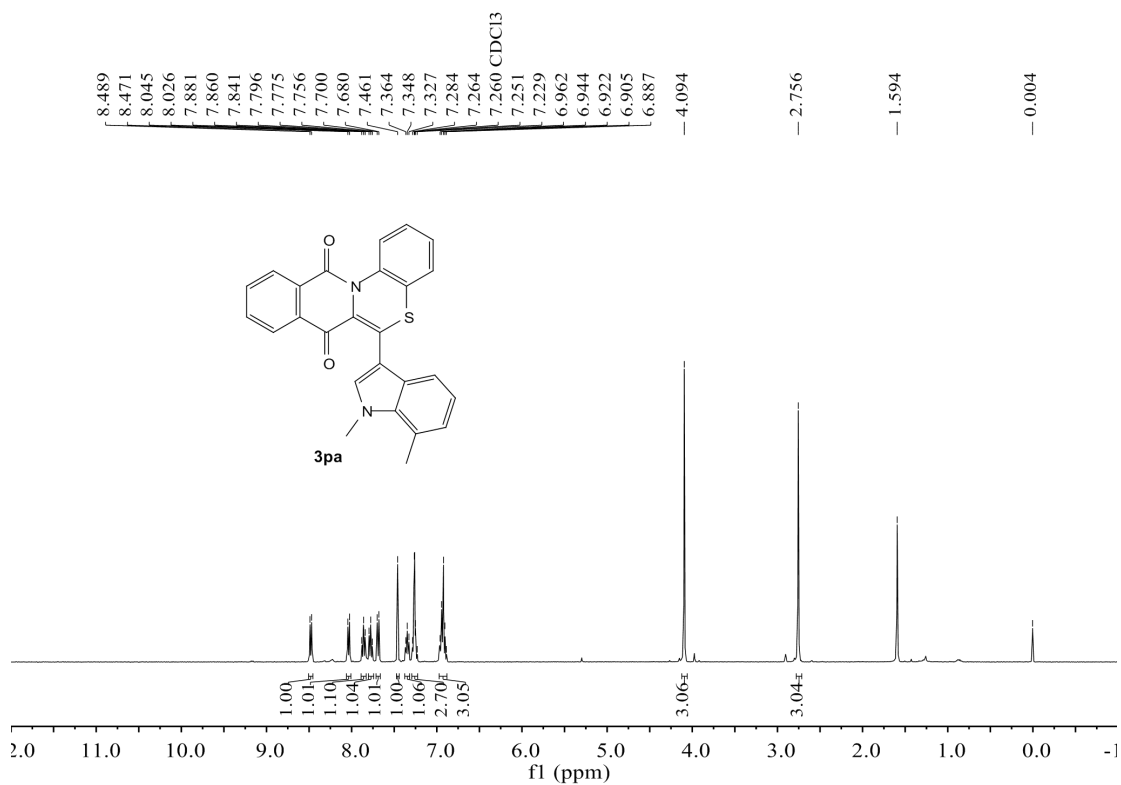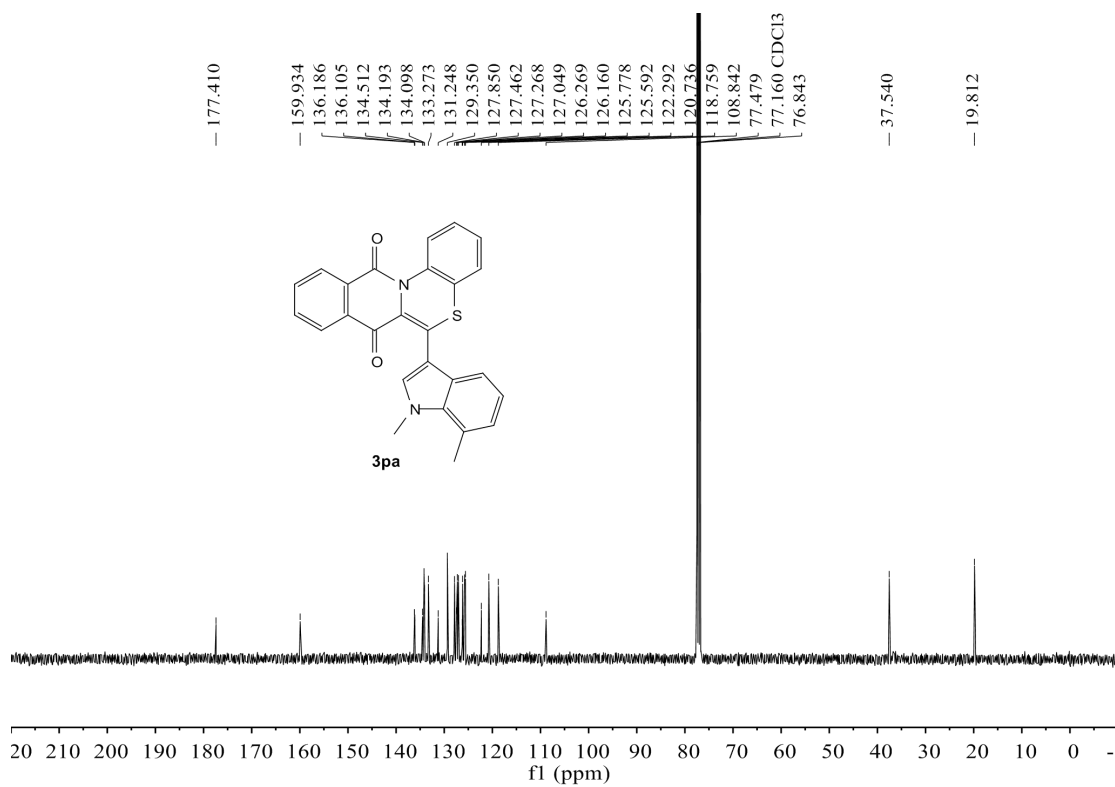

$^1\text{H}$  NMR (400 MHz) and  $^{13}\text{C}$  NMR (100 MHz) spectra of **3qa** ( $\text{CDCl}_3$ )

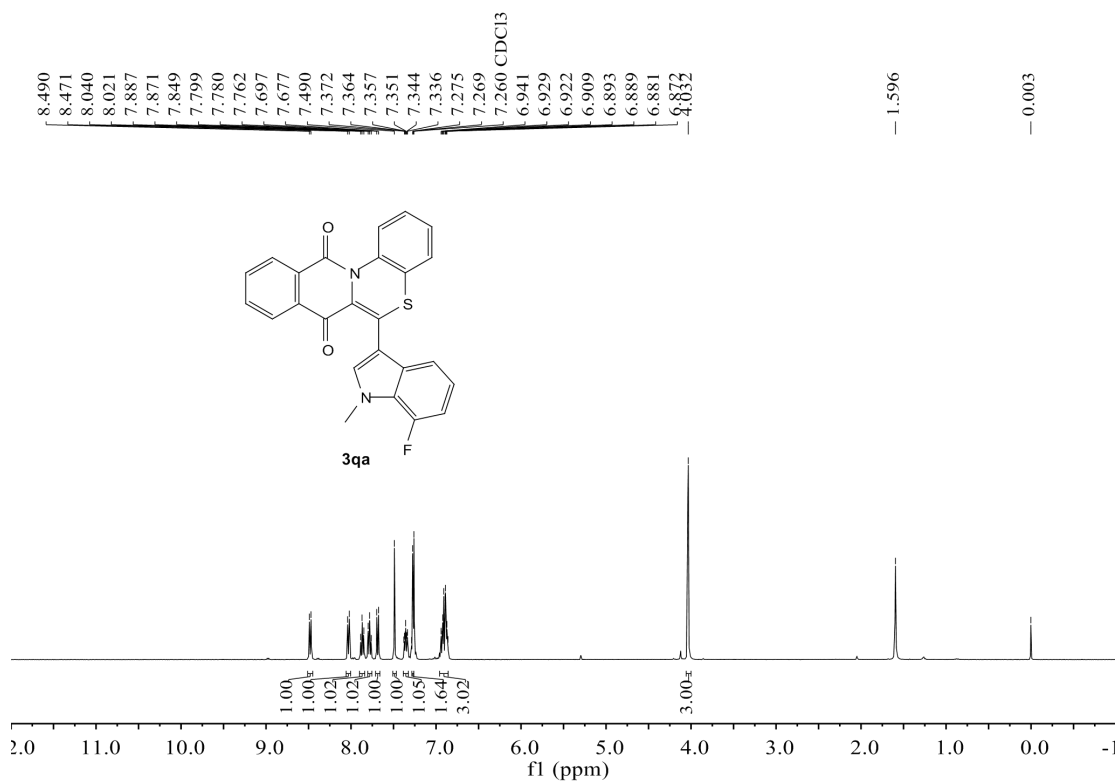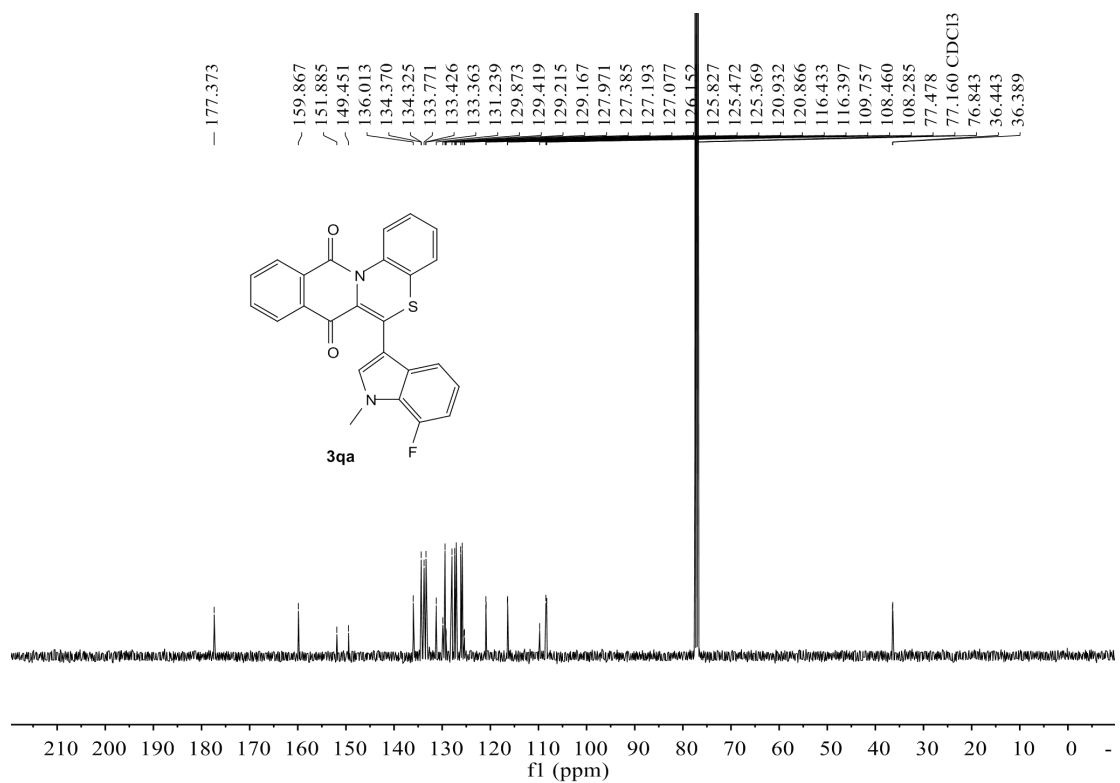

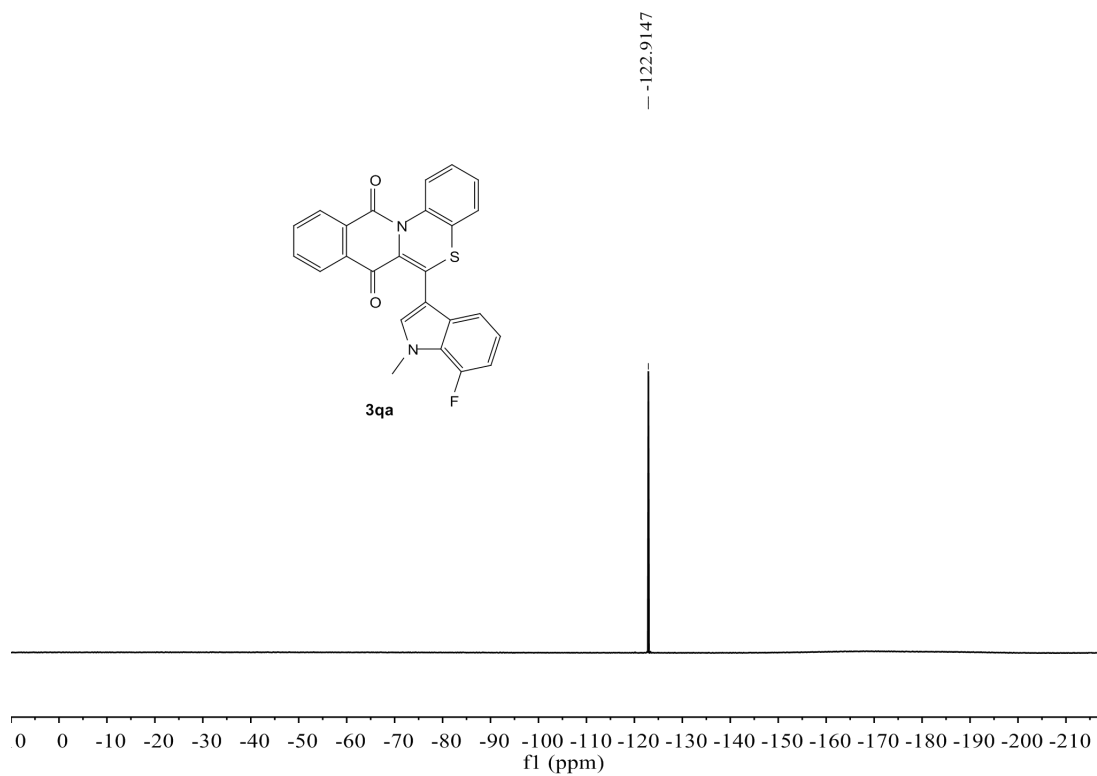

$^1\text{H}$  NMR (400 MHz) and  $^{13}\text{C}$  NMR (100 MHz) spectra of **3ra** ( $\text{CDCl}_3$ )

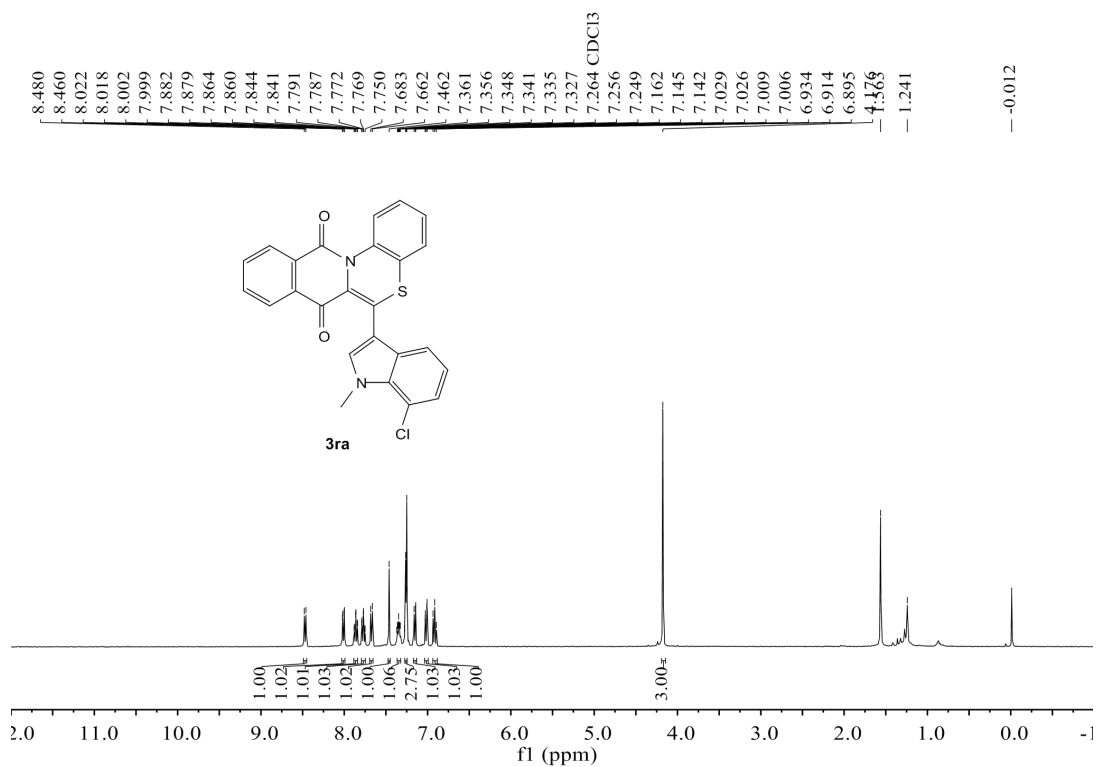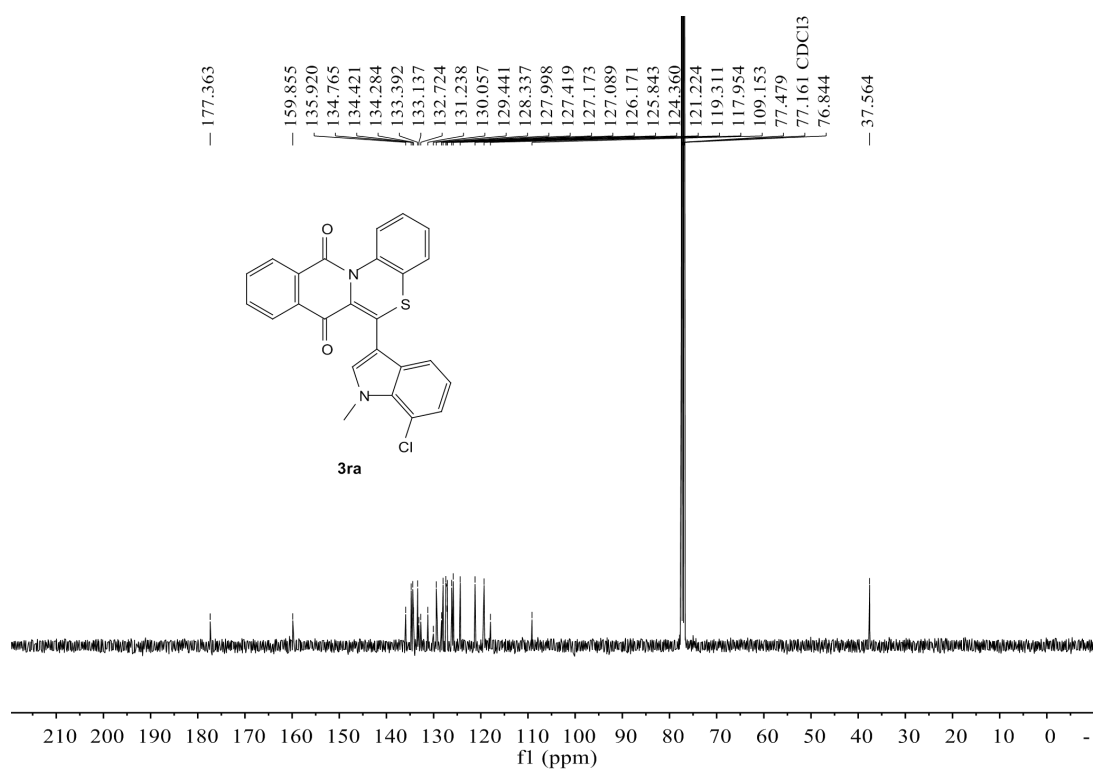

Supplement: d4qo00782d1.pdf [file d4qo00782d1.pdf]
